# Supplementary material for: Translating the Symptom Screening in Paediatrics Tool (SSPedi) into North American Spanish and Among Spanish-speaking children receiving cancer treatments: evaluating understandability and cultural relevance in a multiple-phase descriptive study
Source: PubMed Central journal article supplement — BMJ Open. 2020 Nov 12;10(11):e037406. doi: 10.1136/bmjopen-2020-037406 (PMC7662419; doi:10.1136/bmjopen-2020-037406), 2020-11-12
Supplement: bmjopen-2020-037406.draft_revisions.pdf [file bmjopen-2020-037406.draft_revisions.pdf]

# BMJ Open

BMJ Open is committed to open peer review. As part of this commitment we make the peer review history of every article we publish publicly available.

When an article is published we post the peer reviewers' comments and the authors' responses online. We also post the versions of the paper that were used during peer review. These are the versions that the peer review comments apply to.

The versions of the paper that follow are the versions that were submitted during the peer review process. They are not the versions of record or the final published versions. They should not be cited or distributed as the published version of this manuscript.

BMJ Open is an open access journal and the full, final, typeset and author-corrected version of record of the manuscript is available on our site with no access controls, subscription charges or pay-per-view fees (<http://bmjopen.bmj.com>).

If you have any questions on BMJ Open's open peer review process please email [info.bmjopen@bmj.com](mailto:info.bmjopen@bmj.com)

# BMJ Open

## Translating the Symptom Screening in Pediatrics Tool (SSPedi) into North American Spanish and Among Spanish-speaking Children Receiving Cancer Treatments, Evaluating Understandability and Cultural Relevance in a Multiple-Phase Descriptive Study

|                               |                                                                                                                                                                                                                                                                                                                                                                                                                                                                                                                                                                                                                                                                                                                                                                                                                                                                                                                                                                                                                                                                                                                                                    |
|-------------------------------|----------------------------------------------------------------------------------------------------------------------------------------------------------------------------------------------------------------------------------------------------------------------------------------------------------------------------------------------------------------------------------------------------------------------------------------------------------------------------------------------------------------------------------------------------------------------------------------------------------------------------------------------------------------------------------------------------------------------------------------------------------------------------------------------------------------------------------------------------------------------------------------------------------------------------------------------------------------------------------------------------------------------------------------------------------------------------------------------------------------------------------------------------|
| Journal:                      | <i>BMJ Open</i>                                                                                                                                                                                                                                                                                                                                                                                                                                                                                                                                                                                                                                                                                                                                                                                                                                                                                                                                                                                                                                                                                                                                    |
| Manuscript ID                 | bmjopen-2020-037406                                                                                                                                                                                                                                                                                                                                                                                                                                                                                                                                                                                                                                                                                                                                                                                                                                                                                                                                                                                                                                                                                                                                |
| Article Type:                 | Original research                                                                                                                                                                                                                                                                                                                                                                                                                                                                                                                                                                                                                                                                                                                                                                                                                                                                                                                                                                                                                                                                                                                                  |
| Date Submitted by the Author: | 31-Jan-2020                                                                                                                                                                                                                                                                                                                                                                                                                                                                                                                                                                                                                                                                                                                                                                                                                                                                                                                                                                                                                                                                                                                                        |
| Complete List of Authors:     | Plenert, Erin; Hospital for Sick Children Research Institute, Child Health Evaluative Sciences<br>Grimes, Allison; University of Texas Health Science Center at San Antonio, Division of Hematology-Oncology<br>Sugalski, Aaron; University of Texas Health Science Center at San Antonio, Division of Hematology-Oncology<br>Langevin, Anne-Marie; University of Texas Health Science Center at San Antonio, Division of Hematology-Oncology<br>Nieto, Dominica; University of Texas Health Science Center at San Antonio, Division of Hematology-Oncology<br>Salaverria, Carmen; Hospital Nacional De Ninos Benjamin Bloom, Department of Oncology<br>Gomez, Sergio; Hospital de Niños Sor María Ludovica, Stem Cell Transplantation Unit<br>Gonzalez, Gisela; Hospital de Niños Sor María Ludovica, Stem Cell Transplantation Unit<br>D'Angelo, Gisela; Hospital de Niños Sor María Ludovica, Stem Cell Transplantation Unit<br>Dupuis, Lee; University of Toronto Leslie Dan Faculty of Pharmacy,<br>Sung, Lillian; Hospital for Sick Children, Division of Haematology/Oncology; Hospital for Sick Children SickKids Learning Institute, CHES |
| Keywords:                     | Paediatric oncology < ONCOLOGY, Bone marrow transplantation < HAEMATOLOGY, Paediatric oncology < PAEDIATRICS                                                                                                                                                                                                                                                                                                                                                                                                                                                                                                                                                                                                                                                                                                                                                                                                                                                                                                                                                                                                                                       |
|                               |                                                                                                                                                                                                                                                                                                                                                                                                                                                                                                                                                                                                                                                                                                                                                                                                                                                                                                                                                                                                                                                                                                                                                    |

SCHOLARONE™  
Manuscripts

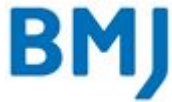

I, the Submitting Author has the right to grant and does grant on behalf of all authors of the Work (as defined in the below author licence), an exclusive licence and/or a non-exclusive licence for contributions from authors who are: i) UK Crown employees; ii) where BMJ has agreed a CC-BY licence shall apply, and/or iii) in accordance with the terms applicable for US Federal Government officers or employees acting as part of their official duties; on a worldwide, perpetual, irrevocable, royalty-free basis to BMJ Publishing Group Ltd ("BMJ") its licensees and where the relevant Journal is co-owned by BMJ to the co-owners of the Journal, to publish the Work in this journal and any other BMJ products and to exploit all rights, as set out in our [licence](#).

The Submitting Author accepts and understands that any supply made under these terms is made by BMJ to the Submitting Author unless you are acting as an employee on behalf of your employer or a postgraduate student of an affiliated institution which is paying any applicable article publishing charge ("APC") for Open Access articles. Where the Submitting Author wishes to make the Work available on an Open Access basis (and intends to pay the relevant APC), the terms of reuse of such Open Access shall be governed by a Creative Commons licence – details of these licences and which [Creative Commons](#) licence will apply to this Work are set out in our licence referred to above.

Other than as permitted in any relevant BMJ Author's Self Archiving Policies, I confirm this Work has not been accepted for publication elsewhere, is not being considered for publication elsewhere and does not duplicate material already published. I confirm all authors consent to publication of this Work and authorise the granting of this licence.

1  
2  
3 TITLE: Translating the Symptom Screening in Pediatrics Tool (SSPedi) into North American  
4 Spanish and Among Spanish-speaking Children Receiving Cancer Treatments, Evaluating  
5 Understandability and Cultural Relevance in a Multiple-Phase Descriptive Study  
6  
7  
8  
9

10  
11 AUTHORS: Erin Plenert BA, MPH<sup>1</sup>; Allison Grimes MD, MSCI<sup>2</sup>; Aaron Sugalski DO<sup>2</sup>; Anne-  
12 Marie Langevin MD<sup>2</sup>; Dominica Nieto BA<sup>2</sup>; Carmen Salaverria MSc<sup>3</sup>; Sergio Gomez MD<sup>4</sup>; Gisela  
13 Gonzalez<sup>4</sup>; Gisela D'Angelo<sup>4</sup>; L. Lee Dupuis RPh, PhD<sup>1,5</sup>; Lillian Sung MD, PhD<sup>1,6</sup>  
14  
15  
16  
17  
18  
19

#### 20 AFFILIATIONS

21  
22 <sup>1</sup>Program in Child Health Evaluative Sciences, The Hospital for Sick Children, Peter Gilgan  
23 Centre for Research and Learning, 686 Bay Street, Toronto, Ontario, M5G 0A4, Canada  
24

25  
26 <sup>2</sup>Pediatric Hematology Oncology, University of Texas Health Science Center at San Antonio,  
27 7703 Floyd Curl Drive, San Antonio, TX, 78229, US  
28

29  
30 <sup>3</sup>Department of Oncology, Benjamin Bloom Children's Hospital, Bulevar De Los Heroes, San  
31 Salvador, El Salvador  
32

33  
34 <sup>4</sup>Stem Cell Transplantation Unit, Hospital de Niños Sor María Ludovica, Calle 14 1631, La Plata,  
35 Argentina  
36

37  
38 <sup>5</sup>Department of Pharmacy, The Hospital for Sick Children, 555 University Avenue, Toronto,  
39 Ontario, M5G 1X8, Canada  
40

41  
42 <sup>6</sup>Division of Haematology/Oncology, The Hospital for Sick Children, 555 University Avenue,  
43 Toronto, Ontario, M5G 1X8, Canada  
44  
45  
46  
47  
48  
49  
50  
51  
52  
53  
54  
55  
56  
57  
58  
59  
60

CORRESPONDING AUTHOR:

Lillian Sung MD, PhD

Division of Haematology/Oncology

The Hospital for Sick Children

555 University Avenue

Toronto, Ontario

M5G 1X8

Telephone: 416-813-5287

Fax: 416-813-5979

Email: [lillian.sung@sickkids.ca](mailto:lillian.sung@sickkids.ca)

KEY WORDS: SSPedi, symptoms, translation, Spanish

WORD COUNTS: Abstract 257; Text 2,254; Tables 2; Figures 2; Appendix 1

## ABSTRACT

**Objectives:** Symptom screening is important to achieving symptom control. Symptom Screening in Pediatrics Tool (SSPedi) is validated for English-speaking children only. Objectives were to translate SSPedi into Spanish, and to evaluate the understandability and cultural relevance of the translated version among Spanish-speaking children with cancer and pediatric hematopoietic stem cell transplant recipients.

**Methods:** We conducted a multi-phase, descriptive study to translate SSPedi into Spanish. The first step was to determine whether one Spanish version would be appropriate for both North America and Argentina. Forward and backward translations were performed. The translated version was evaluated by Spanish-speaking children 8-18 years of age receiving cancer treatments.

**Primary and Secondary Outcome Measures:** Children self-reported difficulty with understanding while cognitive interviews identified incorrect understanding of SSPedi items. Cultural relevance was assessed qualitatively.

**Results:** This report focuses on North American Spanish as a separate version will be required for Argentinian Spanish SSPedi. There were 20 children from Toronto and San Antonio included in cognitive interviews. The most common types of Spanish spoken were Mexican (13, 65%), Central American (2, 10%) and South American (2, 10%). No child reported that it was hard or very hard to complete Spanish SSPedi. Changes to the instrument itself were not required. After enrollment of 20 respondents, the North American version of Spanish SSPedi was considered satisfactory based upon self-reported difficulty with understanding, adjudicated incorrect understanding and cultural relevance.

**Conclusions:** We translated and finalized Spanish SSPedi appropriate for use in North America. Future research will translate and evaluate SSPedi for use in Argentina and other Spanish-speaking countries.

1  
2  
3 **STRENGTHS AND LIMITATIONS OF THIS STUDY**  
4

- 5 • Multi-center conduct
- 6
- 7 • Multiple approaches to assessing understandability
- 8
- 9 • Use of external adjudicators
- 10
- 11
- 12 • Limited by conduct in only two countries
- 13
- 14 • Limited by no testing in Mexico
- 15

16  
17  
18  
19  
20  
21  
22  
23  
24  
25  
26  
27  
28  
29  
30  
31  
32  
33  
34  
35  
36  
37  
38  
39  
40  
41  
42  
43  
44  
45  
46  
47  
48  
49  
50  
51  
52  
53  
54  
55  
56  
57  
58  
59  
60

For peer review only

## BACKGROUND

Pediatric cancer patients experience prevalent and severely bothersome symptoms during treatment.(1-3) Active symptom screening and reporting are likely to be important in optimizing symptom control. In prior research, we identified the lack of appropriate symptom screening measures for children with cancer(4) and consequently, developed a new tool named the Symptom Screening in Pediatrics Tool (SSPedi).(5) SSPedi asks about the degree to which 15 symptoms bothered the child yesterday or today on a 5-point Likert scale.

To evaluate the psychometric properties of SSPedi, we conducted a multi-center study with 502 English-speaking children with sites in both Canada and the United States. All children enrolled in the study were between the ages of 8-18 and receiving cancer therapies. SSPedi was found to be reliable (internal consistency and test re-test and inter-rater reliability), valid (construct validity), and responsive to change.(5) More precisely, the intraclass correlation coefficients were 0.88 (95% CI 0.82 to 0.92) for test re-test reliability, and 0.76 (95% confidence interval (CI) 0.71 to 0.80) for inter-rater reliability between children and their parents. The mean difference in SSPedi scores between groups that were hypothesized to be more and less symptomatic was 7.8 (95% CI 6.4 to 9.2;  $P < 0.001$ ). (5) Construct validity was demonstrated as all hypothesized relationships among measures were observed. SSPedi was responsive to change - those who reported they were much better or worse on a global symptom change scale had significantly changed from their baseline score (mean absolute difference 5.6, 95% CI 3.8 to 7.5;  $P < 0.001$ ).

Translation into other languages will be an important component of SSPedi adoption within and outside of North America. We initially chose to focus translation on Spanish as it is a common first language of children in the United States.(6) Consequently, objectives were to translate SSPedi into Spanish and to evaluate the understandability and cultural relevance of the translated version of SSPedi among children with cancer and hematopoietic stem cell transplant (HSCT) recipients.



## METHODS

To translate SSPedi into Spanish, we conducted a multi-phase, descriptive study which was approved by the Hospital for Sick Children's Research Ethics Board (#1000057560) and the Research Ethics Boards of all participating sites. Written informed consent and assent was obtained from all study participants or guardians, in the case of children providing assent. The following reflect the specific steps taken for translation of SSPedi into Spanish. The target countries were the United States, Canada and Argentina. We first determined whether one Spanish version would be appropriate for North America and Argentina. Next, we conducted translation followed by cognitive interviews as further described below.

### Translation

In this study, translation of SSPedi included four distinct steps, namely forward translation, reconciliation, back translation and back translation review. We followed the guiding principles for the translation and cultural adaptation process for patient-reported outcomes from the ISPOR Task Force.<sup>(7)</sup> The generic methods that will be used for SSPedi translations are provided as Appendix 1.

Forward translation involved the independent translation of SSPedi from English (source language) by two professional medical translators, at least one of whom resided in the country targeted for translation. Reconciliation between the translated versions of SSPedi occurred via a translation panel, which consisted of investigators from the enrollment sites, both translators and the Toronto-based team. The Toronto-based research team included one pediatric oncologist, one pediatric pharmacist, one clinical research manager and one clinical research project assistant.

Next, the product of reconciliation was back translated to English by a third translator who did not have knowledge of English SSPedi and who was a native English speaker. The

1  
2  
3 translation panel then reviewed the back translation against the source instrument to identify  
4 any discrepancies in meaning.  
5  
6

7 In addition to translating SSPedi itself, the professional medical translators also  
8 translated the synonym list. The synonym list was created for the English version of SSPedi to  
9 facilitate child self-report. It provides alternative words for each SSPedi symptom and was  
10 derived primarily through cognitive interviews with children themselves.  
11  
12  
13  
14  
15  
16  
17

### 18 **Cognitive Interviewing**

19 The interviews were audio-recorded and sent to Toronto for evaluation and adjudication.  
20 The goals were to determine whether children found the Spanish translated version of SSPedi  
21 difficult to understand, whether they incorrectly understood it, and whether there were cultural  
22 issues with the instrument. Interviews were conducted by trained research associates or nurses  
23 with experience in cognitive probing who are fluent in Spanish and English. Children were  
24 eligible to participate if they were 8 to 18 years of age; they had a diagnosis of cancer or were  
25 HSCT recipients; and Spanish was their first language (permissible for both English and  
26 Spanish to be their first language). We excluded participants who had visual or cognitive  
27 impairments that precluded completion of SSPedi according to their healthcare provider.  
28 Sampling was purposive to ensure that children of varying ages, underlying diagnosis and  
29 gender were included.  
30  
31  
32  
33  
34  
35  
36  
37  
38  
39  
40  
41  
42

43 First, the respondent completed the translated version of SSPedi on paper in the  
44 presence of the interviewer. SSPedi could be read aloud if the child was having difficulty with  
45 reading. Child respondents rated how easy or hard the translated version of SSPedi was to  
46 understand using a 5-point Likert scale ranging from 1="very hard" to 5="very easy". The  
47 instrument overall, each of the 15 items and the response scale were evaluated. We reported  
48 the number of children who found SSPedi hard or very hard to understand (score of 1 or 2). We  
49 also evaluated the child's understanding of each item and the response scale using cognitive  
50  
51  
52  
53  
54  
55  
56  
57  
58  
59  
60

1  
2  
3 probing. Both the interviewer and an independent rater in Toronto who listened to the audio-  
4 recording adjudicated understanding using a 4-point Likert scale ranging from 1="completely  
5 incorrect" to 4="completely correct". Discrepancies were resolved by consensus. We described  
6 the number of items that were rated as partially or completely incorrect (score of 1 or 2). Finally,  
7 we asked children whether any questions within SSPedi did not make sense to them in thinking  
8 about their day-to-day life in order to assess cultural relevance. Children could have responded  
9 to questions in English or Spanish according to their preference.  
10  
11  
12  
13  
14  
15  
16  
17

18 After each group of five children were interviewed, the study team met to review the  
19 responses to identify whether the translated version of SSPedi should be modified. Modification  
20 could be made to the script, the instrument itself or a synonym list of terms available for each  
21 SSPedi item. Formal evaluation of difficulty with understanding and incorrect understanding was  
22 performed after each group of 10 children were interviewed (considered one iteration).  
23  
24  
25  
26  
27

28 Criteria to consider the Spanish version satisfactory were as follows: no more than one  
29 of the last 10 participants found the entire instrument and each item hard to understand, no  
30 more than one of the last 10 participants were incorrect in their understanding of each item as  
31 adjudicated by the raters, and other questions including those pertaining to cultural relevance  
32 did not suggest that modifications were required. Sample size was based upon the suggestion  
33 that seven to 10 interviews are sufficient to determine understandability of an item.(8) We  
34 therefore intended to enroll up to 10-30 children to allow for up to three iterations consisting of  
35 10 children each. All analyses were descriptive.  
36  
37  
38  
39  
40  
41  
42  
43  
44  
45  
46

## 47 Finalization

48 The final version of Spanish SSPedi was reviewed by all members of the translation  
49 panel to ensure cohesiveness and freedom from minor error. The final version was then  
50 formatted.  
51  
52  
53  
54  
55  
56  
57  
58  
59  
60

## Patient and Public Involvement

No patients were involved in study design or conduct apart from being participants in the research.

## RESULTS

With Spanish-speaking investigators and translators from the United States, Canada and Argentina, we identified that at least two versions of Spanish will be required, namely one appropriate for North America and one appropriate for Argentina. Only the North American version is presented in this manuscript; the Argentinian version will be reported separately. Thus, enrollment sites for this report were The Hospital for Sick Children, Toronto, Canada and University of Texas Health Sciences Center San Antonio, San Antonio, United States.

Between January 2018 and April 2019, we identified 38 children and enrolled 20 participants, at which point North American Spanish SSPedi was considered satisfactory (Figure 1). Table 1 shows the demographics of the included participants. The number of children who were 8-10, 11-14 and 15-18 years of age were 4 (20%), 7 (35%) and 9 (45%) respectively. The most common types of Spanish spoken were Mexican (13, 65%) followed by Central American (2, 10%), South American (2, 10%) and other (3, 15%).

**Table 1: Demographic Characteristics of Participants Evaluating North American Spanish SSPedi**

|                              | Cohort 1<br>(n=10) | Cohort 2<br>(n=10) |
|------------------------------|--------------------|--------------------|
| Sex                          |                    |                    |
| Male                         | 6                  | 6                  |
| Female                       | 4                  | 4                  |
| Age in Years                 |                    |                    |
| 8-10                         | 1                  | 3                  |
| 11-14                        | 4                  | 3                  |
| 15-18                        | 5                  | 4                  |
| Diagnosis                    |                    |                    |
| Leukemia/lymphoma            | 9                  | 4                  |
| Solid tumor                  | 1                  | 3                  |
| Brain tumor                  | 0                  | 2                  |
| Other*                       | 0                  | 1                  |
| Metastatic Disease           | 0                  | 0                  |
| Relapse                      | 1                  | 1                  |
| Stem Cell Transplantation    | 1                  | 1                  |
| Active Treatment             | 7                  | 4                  |
| Born in Country of Interview | 6                  | 9                  |
| Type of Spanish Spoken       |                    |                    |
| Mexican                      | 5                  | 8                  |
| Central American             | 2                  | 0                  |
| South American               | 1                  | 1                  |
| Other                        | 2                  | 1                  |
| Inpatient at Interview       | 0                  | 1                  |
| Attending School             | 5                  | 9                  |

Abbreviation: SSPedi – Symptom Screening in Pediatrics Tool

\*Other - primary immunodeficiency (n=1)

None of the child respondents reported that it was hard or very hard to complete Spanish SSPedi overall. Table 2 shows self-reported difficulty with understanding and adjudicated incorrect understanding of SSPedi items. Changes made after the first two iterations were additions to the synonym list only, based on alternative words given by children during the interview process. No changes to the instrument were required. In the last 10 enrolled participants, at most one participant found each item hard to understand and none were incorrect in their understanding of each item. None of the respondents were incorrect in

1  
2  
3 their understanding of the response scale. In terms of cultural relevance, no issues were  
4  
5 identified by any of the 20 respondents. None of the children interviewed indicated that there  
6  
7 were additional symptoms they felt were missing from the tool.  
8  
9

10  
11 **Table 2: Self-reported Difficulty with Understanding and Rater-Adjudicated Incorrectness**  
12 **with North American Spanish SSPedi\***  
13

|                                 | Cohort 1<br>(n=10) |           | Cohort 2<br>(n=10) |           |
|---------------------------------|--------------------|-----------|--------------------|-----------|
|                                 | Hard to Understand | Incorrect | Hard to Understand | Incorrect |
| Disappointed or Sad             | 0                  | 0         | 0                  | 0         |
| Scared or Worried               | 0                  | 0         | 0                  | 0         |
| Cranky or Angry                 | 1                  | 0         | 1                  | 0         |
| Difficulty Thinking/Remembering | 0                  | 0         | 1                  | 0         |
| Changes in your face/body       | 0                  | 0         | 1                  | 0         |
| Tired                           | 0                  | 0         | 0                  | 0         |
| Mouth sores                     | 2                  | 1         | 1                  | 0         |
| Headache                        | 0                  | 0         | 0                  | 0         |
| Hurt or Pain                    | 0                  | 1         | 0                  | 0         |
| Tingly or numb hands or feet    | 2                  | 0         | 1                  | 0         |
| Throwing Up                     | 0                  | 0         | 0                  | 0         |
| More or less hungry             | 0                  | 0         | 0                  | 0         |
| Changes in Taste                | 0                  | 0         | 1                  | 0         |
| Constipation                    | 0                  | 0         | 1                  | 0         |
| Diarrhea                        | 0                  | 0         | 0                  | 0         |

14  
15  
16  
17  
18  
19  
20  
21  
22  
23  
24  
25  
26  
27  
28  
29  
30  
31  
32  
33  
34  
35  
36  
37  
38 \* Hard = rated as hard or very hard to understand by participant  
39 Incorrect = rated as partially or completely incorrect by rater  
40  
41

42 Thus, after 20 participants, the North American Spanish version of SSPedi was  
43 considered satisfactory and appropriate for utilization. Figure 2 shows the final version.  
44  
45  
46  
47

## 48 DISCUSSION

49  
50 We translated a self-report symptom screening tool for pediatric patients with cancer and  
51 HSCT recipients named SSPedi into Spanish appropriate for use in North America. The final  
52  
53  
54  
55  
56  
57  
58  
59  
60

1  
2  
3 version was acceptable based upon self-reported difficulty with understanding and adjudicated  
4 incorrect understanding of different aspects of SSPedi and cultural relevance.  
5  
6

7 We found that at least two versions of Spanish SSPedi will be needed since Argentinian  
8 Spanish was considered sufficiently different from North American Spanish to require a distinct  
9 version. Interestingly, different quality of life instruments have taken alternate approaches to  
10 Spanish translation. For example, the developers of the PedsQL modules have chosen to  
11 translate Spanish for several different countries including the United States, Argentina,  
12 Columbia and Spain.(9) In contrast, the Patient-Reported Outcome Measurement Information  
13 System has a single Spanish translation version.(10)  
14  
15

16 We termed this version of Spanish SSPedi “North American” even though we did not  
17 include a site in Mexico. However, we noted that the majority of children self-identified their  
18 Spanish type as Mexican, thus providing reassurance that this version should be appropriate in  
19 that country. Ideally, further testing in Mexico would be conducted to confirm understandability  
20 and cultural relevance in that setting. Some could argue that North American Spanish is not a  
21 distinct form of Spanish as it reflects the Spanish spoken in several different originating  
22 countries. However, a study conducted in the United States or Canada is unlikely to use multiple  
23 versions of Spanish. Thus, creating a North America Spanish version addresses a practical  
24 clinical and research need in these geographic locations.  
25  
26  
27  
28  
29  
30  
31  
32  
33  
34  
35  
36  
37  
38  
39  
40

41 In the creation of English SSPedi, we found four items more difficult to understand by  
42 children 8-18 years of age, namely ‘changes in how your body and face look’, ‘tingly or numb  
43 hands or feet’, ‘feeling more or less hungry than you usually do’, and ‘constipation (hard to  
44 poop).(11) Interestingly, three of these four items were similarly hard to understand by at least  
45 one participant in this study. This may suggest that difficulty with understanding was not related  
46 to Spanish translation but rather, that these are more difficult concepts for children in general to  
47 understand.  
48  
49  
50  
51  
52  
53  
54  
55  
56  
57  
58  
59  
60

1  
2  
3 The strengths of this study were conduct of the translation according to internationally  
4 recognized standards and evaluation in two countries. However, weaknesses included  
5 enrollment of a limited number of children and in only two centers. Evaluation in other locations  
6 and with additional children may influence the synonym list further although based upon the  
7 initial results, it is less likely that changes to the instrument itself will be required.  
8  
9  
10  
11  
12

13 In summary, we translated and finalized Spanish SSPedi appropriate for use in North  
14 America. Future research will translate and evaluate SSPedi for use in Argentina and other  
15 Spanish-speaking countries.  
16  
17  
18  
19  
20  
21

## 22 **ACKNOWLEDGMENTS**

23  
24 We thank all the translators who worked with us on this project and whose expertise and  
25 insights greatly assisted the translation and evaluation process.  
26  
27  
28  
29

## 30 **AUTHOR CONTRIBUTORSHIP**

31  
32 LD and LS developed the study concept and design. EP, DN, CS, SG, GG, and GD were  
33 involved in data collection. LS drafted the manuscript. All authors EP, AG, AS, AML, DN, CS,  
34 SG, GG, GD, LD, and LS participated in data interpretation, reviewed, revised, and approved  
35 the manuscript.  
36  
37  
38  
39  
40  
41  
42

## 43 **COMPETING INTERESTS**

44  
45 The authors declare that they have no competing interests.  
46  
47  
48  
49

## 50 **FUNDING**

51  
52 This research received no specific grant from any funding agency in the public, commercial or  
53 not-for-profit sectors.  
54  
55  
56  
57  
58  
59  
60



1  
2  
3  
4  
5  
6  
7  
8  
9  
10  
11  
12  
13  
14  
15  
16  
17  
18  
19  
20  
21  
22  
23  
24  
25  
26  
27  
28  
29  
30  
31  
32  
33  
34  
35  
36  
37  
38  
39  
40  
41  
42  
43  
44  
45  
46  
47  
48  
49  
50  
51  
52  
53  
54  
55  
56  
57  
58  
59  
60

**DATA SHARING**

The datasets used or analyzed during the current study are available from the corresponding author on reasonable request.

**FIGURE LEGEND**

Figure 1: North American Spanish SSPedi Participant Flow Diagram

Figure 2: North American Spanish SSPedi

For peer review only

## REFERENCES

1. Baggott C, Dodd M, Kennedy C, et al. Changes in children's reports of symptom occurrence and severity during a course of myelosuppressive chemotherapy. *J Pediatr Oncol Nurs*. 2010;27(6):307-15 doi:10.1177/1043454210377619
2. Miller E, Jacob E, Hockenberry MJ. Nausea, pain, fatigue, and multiple symptoms in hospitalized children with cancer. *Oncol Nurs Forum*. 2011;38(5):E382-93 doi:10.1188/11.ONF.E382-E393
3. Poder U, Ljungman G, von Essen L. Parents' perceptions of their children's cancer-related symptoms during treatment: a prospective, longitudinal study. *J Pain Symptom Manage*. 2010;40(5):661-70 doi:10.1016/j.jpainsymman.2010.02.012
4. Dupuis LL, Ethier MC, Tomlinson D, et al. A systematic review of symptom assessment scales in children with cancer. *BMC Cancer*. 2012;12:430 doi:10.1186/1471-2407-12-430
5. Tomlinson D, Dupuis LL, Gibson P, et al. Initial development of the Symptom Screening in Pediatrics Tool (SSPedi). *Support Care Cancer*. 2014;22(1):71-5 doi:10.1007/s00520-013-1945-x
6. Gonzalez-Barrera A, Lopez M. Spanish is the most spoken non-English language in U.S. homes, even among non-Hispanics Washington, D.C.: Pew Research Center; 2013. Date accessed 20Jan2020. Available from: <https://www.pewresearch.org/fact-tank/2013/08/13/spanish-is-the-most-spoken-non-english-language-in-u-s-homes-even-among-non-hispanics/>.
7. Wild D, Grove A, Martin M, et al. Principles of Good Practice for the Translation and Cultural Adaptation Process for Patient-Reported Outcomes (PRO) Measures: report of the ISPOR Task Force for Translation and Cultural Adaptation. *Value Health*. 2005;8(2):94-104 doi:10.1111/j.1524-4733.2005.04054.x
8. Willis G, editor. *Cognitive Interviewing: A Tool for Improving Questionnaire Design*: Sage Publications; 2009.
9. Varni JW. PedsQL Translations 2019. Date accessed 20Jan2020. Available from: <https://www.pedsq.org/translations.html>.
10. HealthMeasures. Available Translations 2019. Date accessed 20Jan2020. Available from: <http://www.healthmeasures.net/explore-measurement-systems/promis/intro-to-promis/available-translations/117-available-translations>.
11. O'Sullivan C, Lee Dupuis L, Gibson P, et al. Evaluation of the electronic self-report Symptom Screening in Pediatrics Tool (SSPedi). *BMJ Support Palliat Care*. 2018;8(1):110-6 doi:10.1136/bmjspcare-2015-001084

**Figure 1: North American Spanish SSPedi Participant Flow Diagram**

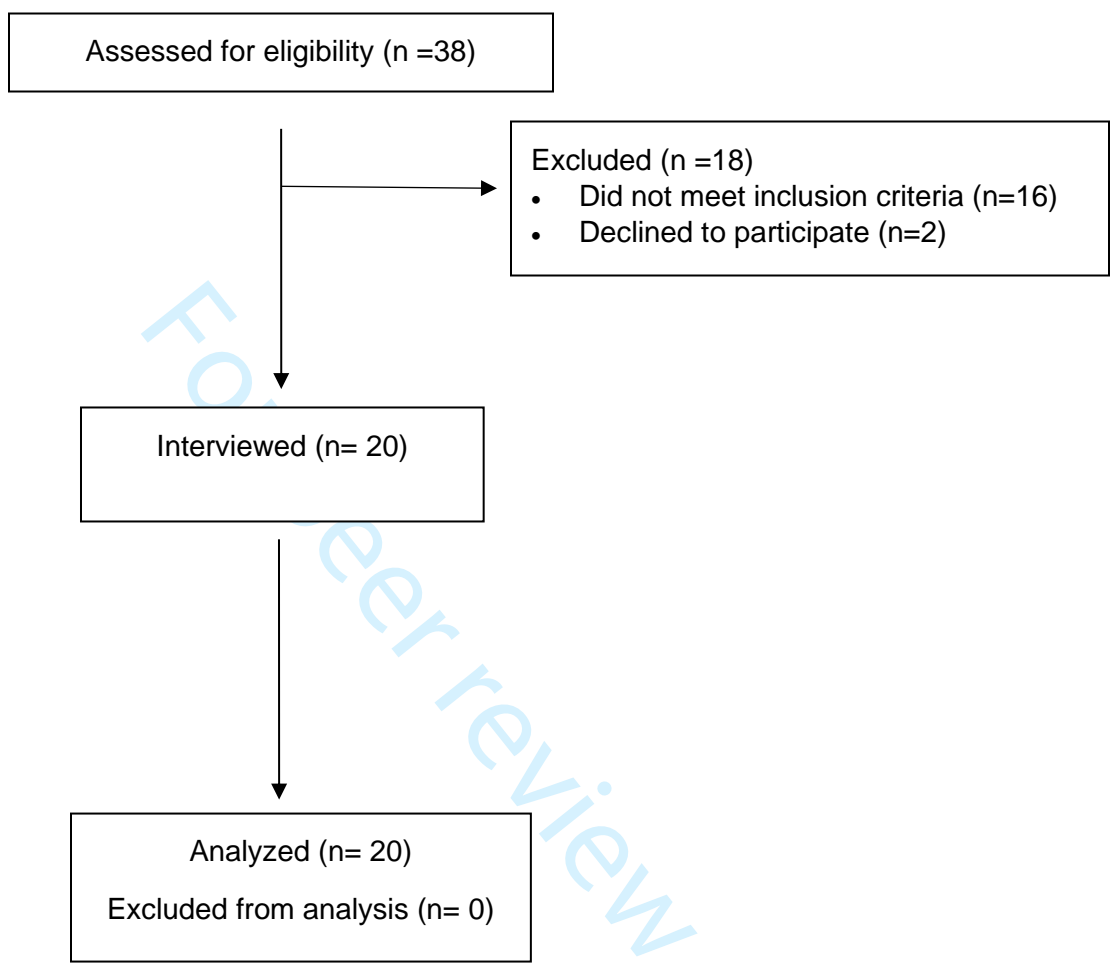

Figure 2: North American Spanish SSPedi

## Spanish SSPedi (North America): detección de síntomas en pediatría

Marca el círculo que mejor describe cuánto te **molestó** cada una de estas cosas **ayer u hoy**:

|                                                            | No me molestó para nada | Un poco               | Más o menos           | Mucho                 | Me molestó muchísimo  |
|------------------------------------------------------------|-------------------------|-----------------------|-----------------------|-----------------------|-----------------------|
| Te sientes decepcionado o triste                           | <input type="radio"/>   | <input type="radio"/> | <input type="radio"/> | <input type="radio"/> | <input type="radio"/> |
| Te sientes asustado o preocupado                           | <input type="radio"/>   | <input type="radio"/> | <input type="radio"/> | <input type="radio"/> | <input type="radio"/> |
| Estas de mal humor o enojado                               | <input type="radio"/>   | <input type="radio"/> | <input type="radio"/> | <input type="radio"/> | <input type="radio"/> |
| Te cuesta pensar o recordar cosas                          | <input type="radio"/>   | <input type="radio"/> | <input type="radio"/> | <input type="radio"/> | <input type="radio"/> |
| Notas algún cambio en el cuerpo o la cara                  | <input type="radio"/>   | <input type="radio"/> | <input type="radio"/> | <input type="radio"/> | <input type="radio"/> |
| Te sientes cansado                                         | <input type="radio"/>   | <input type="radio"/> | <input type="radio"/> | <input type="radio"/> | <input type="radio"/> |
| Tienes llagas en la boca                                   | <input type="radio"/>   | <input type="radio"/> | <input type="radio"/> | <input type="radio"/> | <input type="radio"/> |
| Tienes dolor de cabeza                                     | <input type="radio"/>   | <input type="radio"/> | <input type="radio"/> | <input type="radio"/> | <input type="radio"/> |
| Sientes malestar o dolor (que no sea dolor de cabeza)      | <input type="radio"/>   | <input type="radio"/> | <input type="radio"/> | <input type="radio"/> | <input type="radio"/> |
| Sientes hormigueo o entumecimiento en las manos o los pies | <input type="radio"/>   | <input type="radio"/> | <input type="radio"/> | <input type="radio"/> | <input type="radio"/> |
| Tienes vómitos o ganas de vomitar                          | <input type="radio"/>   | <input type="radio"/> | <input type="radio"/> | <input type="radio"/> | <input type="radio"/> |
| Tienes más o menos hambre que de costumbre                 | <input type="radio"/>   | <input type="radio"/> | <input type="radio"/> | <input type="radio"/> | <input type="radio"/> |
| Notas cambios en el gusto                                  | <input type="radio"/>   | <input type="radio"/> | <input type="radio"/> | <input type="radio"/> | <input type="radio"/> |
| Tienes estreñimiento (dificultad para hacer popó)          | <input type="radio"/>   | <input type="radio"/> | <input type="radio"/> | <input type="radio"/> | <input type="radio"/> |
| Tienes diarrea (popó aguada)                               | <input type="radio"/>   | <input type="radio"/> | <input type="radio"/> | <input type="radio"/> | <input type="radio"/> |

Cuéntanos cualquier otra cosa que te haya molestado recientemente y escríbelo aquí.

Fecha de la versión: 27 febrero 2018

## Appendix 1: Guidelines for Conducting Translation of SSPedi

| Step | Description                            | Details                                                                                                                                                                                                                                                                                                                                                                                                                                                                                                                                  |
|------|----------------------------------------|------------------------------------------------------------------------------------------------------------------------------------------------------------------------------------------------------------------------------------------------------------------------------------------------------------------------------------------------------------------------------------------------------------------------------------------------------------------------------------------------------------------------------------------|
| 1    | Forward translation                    | Two native speakers of the target language independently produce a forward translation of SSPedi from English into the target language. Both must be professional medical translators and at least one must reside in the country targeted for translation.                                                                                                                                                                                                                                                                              |
| 2    | Reconciliation of forward translations | Translation panel consists of the two forward translators and investigators from enrollment sites where translation will be tested. Discrepancies between translators identified and resolved by consensus. Goal is to produce a single translated version of the tool.                                                                                                                                                                                                                                                                  |
| 3    | Back translation                       | Forward translation is back translated into English by an independent translator. Back translator must be a native English speaker with no knowledge of English SSPedi.                                                                                                                                                                                                                                                                                                                                                                  |
| 4    | Back translation review                | Comparison of back translated version of SSPedi with original SSPedi tool by the research team to detect mistranslations or inaccuracies. Goal is to produce a final translated version of the tool ready for testing.                                                                                                                                                                                                                                                                                                                   |
| 5    | Cognitive interviewing                 | Goals are to determine if<br>a) SSPedi items and response scale are: <ul style="list-style-type: none"> <li>• Easy to understand as rated by children</li> <li>• Correctly interpreted as rated by the interviewer and a second adjudicator</li> </ul> b) there are any issues with cultural relevancy<br>A minimum of <b>10</b> children from target population must be enrolled.                                                                                                                                                       |
| 6    | Review interview findings              | Interview findings are summarized by iterations of 10 children. Translation panel decides whether revisions required or whether translated version is satisfactory. In general, criteria to consider the translation satisfactory are:<br>a) No more than one participants in the last 10 finds an item hard or very hard to understand<br>b) No more than one participant in the last 10 is incorrect in their understanding of an item<br>c) Comments do not indicate other modification or additions to the synonym list are required |
| 7    | <i>Further cognitive interviewing</i>  | <i>If any changes were made, additional cognitive interviews conducted in iterations of 10 children until the translated version is considered satisfactory</i>                                                                                                                                                                                                                                                                                                                                                                          |
| 8    | Finalization                           | The final translated version of SSPedi reviewed by the translation panel to ensure cohesiveness and freedom from minor error.                                                                                                                                                                                                                                                                                                                                                                                                            |

# BMJ Open

## Translating the Symptom Screening in Pediatrics Tool (SSPedi) into North American Spanish and Among Spanish-speaking Children Receiving Cancer Treatments, Evaluating Understandability and Cultural Relevance in a Multiple-Phase Descriptive Study

|                                 |                                                                                                                                                                                                                                                                                                                                                                                                                                                                                                                                                                                                                                                                                                                                                                                                                                                                                                                                                                                                                                                                                                                                                    |
|---------------------------------|----------------------------------------------------------------------------------------------------------------------------------------------------------------------------------------------------------------------------------------------------------------------------------------------------------------------------------------------------------------------------------------------------------------------------------------------------------------------------------------------------------------------------------------------------------------------------------------------------------------------------------------------------------------------------------------------------------------------------------------------------------------------------------------------------------------------------------------------------------------------------------------------------------------------------------------------------------------------------------------------------------------------------------------------------------------------------------------------------------------------------------------------------|
| Journal:                        | <i>BMJ Open</i>                                                                                                                                                                                                                                                                                                                                                                                                                                                                                                                                                                                                                                                                                                                                                                                                                                                                                                                                                                                                                                                                                                                                    |
| Manuscript ID                   | bmjopen-2020-037406.R1                                                                                                                                                                                                                                                                                                                                                                                                                                                                                                                                                                                                                                                                                                                                                                                                                                                                                                                                                                                                                                                                                                                             |
| Article Type:                   | Original research                                                                                                                                                                                                                                                                                                                                                                                                                                                                                                                                                                                                                                                                                                                                                                                                                                                                                                                                                                                                                                                                                                                                  |
| Date Submitted by the Author:   | 26-May-2020                                                                                                                                                                                                                                                                                                                                                                                                                                                                                                                                                                                                                                                                                                                                                                                                                                                                                                                                                                                                                                                                                                                                        |
| Complete List of Authors:       | Plenert, Erin; Hospital for Sick Children Research Institute, Child Health Evaluative Sciences<br>Grimes, Allison; University of Texas Health Science Center at San Antonio, Division of Hematology-Oncology<br>Sugalski, Aaron; University of Texas Health Science Center at San Antonio, Division of Hematology-Oncology<br>Langevin, Anne-Marie; University of Texas Health Science Center at San Antonio, Division of Hematology-Oncology<br>Nieto, Dominica; University of Texas Health Science Center at San Antonio, Division of Hematology-Oncology<br>Salaverria, Carmen; Hospital Nacional De Ninos Benjamin Bloom, Department of Oncology<br>Gomez, Sergio; Hospital de Niños Sor María Ludovica, Stem Cell Transplantation Unit<br>Gonzalez, Gisela; Hospital de Niños Sor María Ludovica, Stem Cell Transplantation Unit<br>D'Angelo, Gisela; Hospital de Niños Sor María Ludovica, Stem Cell Transplantation Unit<br>Dupuis, Lee; University of Toronto Leslie Dan Faculty of Pharmacy,<br>Sung, Lillian; Hospital for Sick Children, Division of Haematology/Oncology; Hospital for Sick Children SickKids Learning Institute, CHES |
| <b>Primary Subject Heading</b>: | Oncology                                                                                                                                                                                                                                                                                                                                                                                                                                                                                                                                                                                                                                                                                                                                                                                                                                                                                                                                                                                                                                                                                                                                           |
| Secondary Subject Heading:      | Paediatrics                                                                                                                                                                                                                                                                                                                                                                                                                                                                                                                                                                                                                                                                                                                                                                                                                                                                                                                                                                                                                                                                                                                                        |
| Keywords:                       | Paediatric oncology < ONCOLOGY, Bone marrow transplantation < HAEMATOLOGY, Paediatric oncology < PAEDIATRICS                                                                                                                                                                                                                                                                                                                                                                                                                                                                                                                                                                                                                                                                                                                                                                                                                                                                                                                                                                                                                                       |
|                                 |                                                                                                                                                                                                                                                                                                                                                                                                                                                                                                                                                                                                                                                                                                                                                                                                                                                                                                                                                                                                                                                                                                                                                    |

1  
2  
3  
4  
5  
6  
7  
8  
9  
10  
11  
12  
13  
14  
15  
16  
17  
18  
19  
20  
21  
22  
23  
24  
25  
26  
27  
28  
29  
30  
31  
32  
33  
34  
35  
36  
37  
38  
39  
40  
41  
42  
43  
44  
45  
46  
47  
48  
49  
50  
51  
52  
53  
54  
55  
56  
57  
58  
59  
60

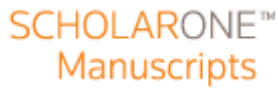



I, the Submitting Author has the right to grant and does grant on behalf of all authors of the Work (as defined in the below author licence), an exclusive licence and/or a non-exclusive licence for contributions from authors who are: i) UK Crown employees; ii) where BMJ has agreed a CC-BY licence shall apply, and/or iii) in accordance with the terms applicable for US Federal Government officers or employees acting as part of their official duties; on a worldwide, perpetual, irrevocable, royalty-free basis to BMJ Publishing Group Ltd ("BMJ") its licensees and where the relevant Journal is co-owned by BMJ to the co-owners of the Journal, to publish the Work in this journal and any other BMJ products and to exploit all rights, as set out in our [licence](#).

The Submitting Author accepts and understands that any supply made under these terms is made by BMJ to the Submitting Author unless you are acting as an employee on behalf of your employer or a postgraduate student of an affiliated institution which is paying any applicable article publishing charge ("APC") for Open Access articles. Where the Submitting Author wishes to make the Work available on an Open Access basis (and intends to pay the relevant APC), the terms of reuse of such Open Access shall be governed by a Creative Commons licence – details of these licences and which [Creative Commons](#) licence will apply to this Work are set out in our licence referred to above.

Other than as permitted in any relevant BMJ Author's Self Archiving Policies, I confirm this Work has not been accepted for publication elsewhere, is not being considered for publication elsewhere and does not duplicate material already published. I confirm all authors consent to publication of this Work and authorise the granting of this licence.



1  
2  
3 TITLE: Translating the Symptom Screening in Pediatrics Tool (SSPedi) into North American  
4 Spanish and Among Spanish-speaking Children Receiving Cancer Treatments, Evaluating  
5 Understandability and Cultural Relevance in a Multiple-Phase Descriptive Study  
6  
7  
8  
9

10  
11 AUTHORS: Erin Plenert BA, MPH<sup>1</sup>; Allison Grimes MD, MSCI<sup>2</sup>; Aaron Sugalski DO<sup>2</sup>; Anne-  
12 Marie Langevin MD<sup>2</sup>; Dominica Nieto BA<sup>2</sup>; Carmen Salaverria MSc<sup>3</sup>; Sergio Gomez MD<sup>4</sup>; Gisela  
13 Gonzalez<sup>4</sup>; Gisela D'Angelo<sup>4</sup>; L. Lee Dupuis RPh, PhD<sup>1,5</sup>; Lillian Sung MD, PhD<sup>1,6</sup>  
14  
15  
16  
17  
18  
19

#### 20 AFFILIATIONS

21  
22 <sup>1</sup>Program in Child Health Evaluative Sciences, The Hospital for Sick Children, Peter Gilgan  
23 Centre for Research and Learning, 686 Bay Street, Toronto, Ontario, M5G 0A4, Canada  
24

25  
26 <sup>2</sup>Pediatric Hematology Oncology, University of Texas Health Science Center at San Antonio,  
27 7703 Floyd Curl Drive, San Antonio, TX, 78229, US  
28

29  
30 <sup>3</sup>Department of Oncology, Benjamin Bloom Children's Hospital, Bulevar De Los Heroes, San  
31 Salvador, El Salvador  
32

33  
34 <sup>4</sup>Stem Cell Transplantation Unit, Hospital de Niños Sor María Ludovica, Calle 14 1631, La Plata,  
35 Argentina  
36

37  
38 <sup>5</sup>Department of Pharmacy, The Hospital for Sick Children, 555 University Avenue, Toronto,  
39 Ontario, M5G 1X8, Canada  
40

41  
42 <sup>6</sup>Division of Haematology/Oncology, The Hospital for Sick Children, 555 University Avenue,  
43 Toronto, Ontario, M5G 1X8, Canada  
44  
45  
46  
47  
48  
49  
50  
51  
52  
53  
54  
55  
56  
57  
58  
59  
60

## CORRESPONDING AUTHOR:

Lillian Sung MD, PhD

Division of Haematology/Oncology

The Hospital for Sick Children

555 University Avenue

Toronto, Ontario

M5G 1X8

Telephone: 416-813-5287

Fax: 416-813-5979

Email: [lillian.sung@sickkids.ca](mailto:lillian.sung@sickkids.ca)

KEY WORDS: SSPedi, symptoms, translation, Spanish

WORD COUNTS: Abstract 281; Text 2,254; Tables 2; Figures 2; Appendix 1

## ABSTRACT

**Objectives:** Symptom screening is important to achieving symptom control. Symptom Screening in Pediatrics Tool (SSPedi) is validated for English-speaking children. Objectives were to translate SSPedi into Spanish, and to evaluate the understandability and cultural relevance of the translated version among Spanish-speaking children with cancer and pediatric hematopoietic stem cell transplant recipients.

**Methods:** We conducted a multi-phase, descriptive study to translate SSPedi into Spanish. The first step was to determine whether one Spanish version would be appropriate for both North America and Argentina by identification of a single translation that would be acceptable and understood in both regions. Forward and backward translations were performed. The translated version was evaluated by Spanish-speaking children 8-18 years of age receiving cancer treatments.

**Primary and Secondary Outcome Measures:** Children self-reported difficulty with understanding using a 5-point Likert scale while cognitive interviews identified incorrect understanding of SSPedi items using a 4-point Likert scale. Cultural relevance was assessed qualitatively.

**Results:** This report focuses on North American Spanish as a separate version will be required for Argentinian Spanish SSPedi. There were 20 children from Toronto and San Antonio included in cognitive interviews. The most common types of Spanish spoken were Mexican (13, 65%), Central American (2, 10%) and South American (2, 10%). No child reported that it was hard or very hard to complete Spanish SSPedi. Changes to the instrument itself were not required.

**Conclusions:** After enrollment of 20 respondents, the North American version of Spanish SSPedi was considered satisfactory based upon self-reported difficulty with understanding, adjudicated incorrect understanding and cultural relevance. We translated and finalized Spanish SSPedi appropriate for use in North America. Future research will translate and evaluate SSPedi for use in Argentina and other Spanish-speaking countries.

## STRENGTHS AND LIMITATIONS OF THIS STUDY

- Multi-center conduct is a strength as it improves generalizability of the study.
- Multiple approaches to assessing understandability is a strength as it improves robustness and validity of the findings.
- Use of external adjudicators is a strength as it improves reliability of the results.
- The study is limited by conduct in only two countries; this version of SSPedi may not be well-understood in other Spanish-speaking countries.

## BACKGROUND

Pediatric cancer patients experience prevalent and severely bothersome symptoms during treatment.(1-3) Common symptoms experienced include pain, nausea and fatigue.(1) More recent studies have also highlighted the prevalence of changes in hunger and taste as bothersome symptoms in this population.(4-7) Symptoms are important because there is strong correlation between increasing symptom burden and worse quality of life.(8) Active symptom screening and reporting are likely to be central in optimizing symptom control. Active symptom screening may identify symptoms early, improve communication of the extent of bother to the healthcare team and increase earlier and more consistent management strategies.

In prior research, we identified the lack of appropriate symptom screening measures for children with cancer based upon length, content validity or appropriateness (9) and consequently, developed a new instrument named the Symptom Screening in Pediatrics Tool (SSPedi).(10) SSPedi asks about the degree to which 15 symptoms bothered the child yesterday or today on a 5-point Likert scale. These symptoms are disappointed or sad, scared or worried, cranky or angry, problems thinking, body or face changes, tiredness, mouth sores, headache, other pain, tingling or numbness, throwing up, hunger changes, taste changes, constipation and diarrhea.

To evaluate the psychometric properties of SSPedi, we conducted a multi-center study with 502 English-speaking children with sites in both Canada and the United States. All children enrolled in the study were between the ages of 8-18 and were receiving cancer therapies. SSPedi was found to be reliable (internal consistency and test re-test and inter-rater reliability), valid (construct validity), and responsive to change.(10) More precisely, the intraclass correlation coefficients were 0.88 (95% confidence interval (CI) 0.82 to 0.92) for test re-test reliability, and 0.76 (95% CI 0.71 to 0.80) for inter-rater reliability between children and their parents. The mean difference in SSPedi scores between groups that were hypothesized to be more and less symptomatic was 7.8 (95% CI 6.4 to 9.2;  $P < 0.001$ ).(10) Construct validity was

1  
2  
3 demonstrated as all hypothesized relationships among measures were observed. SSPedi was  
4 responsive to change; those who reported they were much better or worse on a global symptom  
5 change scale had significantly changed from their baseline score (mean absolute difference 5.6,  
6 95% CI 3.8 to 7.5;  $P < 0.001$ ).  
7  
8  
9

10  
11 Translation into other languages will be an important component of SSPedi adoption within  
12 and outside of North America. We initially chose to focus translation on Spanish as it is a  
13 common first language of children in the United States.<sup>(11)</sup> The process of translation to  
14 Spanish must consider both cultural and linguistic perspectives.<sup>(12)</sup> Consequently, objectives  
15 were to translate SSPedi into Spanish and to evaluate the understandability and cultural  
16 relevance of the translated version of SSPedi among children with cancer and pediatric  
17 hematopoietic stem cell transplant (HSCT) recipients.  
18  
19  
20  
21  
22  
23  
24  
25  
26  
27

## 28 **METHODS**

29  
30 To translate SSPedi into Spanish, we conducted a multi-phase, descriptive study that was  
31 approved by The Hospital for Sick Children's Research Ethics Board (#1000057560) and the  
32 Research Ethics Boards of all participating sites. Written informed consent and assent was  
33 obtained from all study participants or guardians (in the case of children providing assent). The  
34 following reflect the specific steps taken for translation of SSPedi into Spanish. The target  
35 countries were the United States, Canada and Argentina. We first determined whether one  
36 Spanish version would be appropriate for North America and Argentina by identification of a  
37 single translation that would be acceptable and understood in both regions. Next, we conducted  
38 translation followed by cognitive interviews as further described below.  
39  
40  
41  
42  
43  
44  
45  
46  
47  
48

49 With Spanish-speaking investigators and translators from the United States, Canada and  
50 Argentina, we identified that at least two versions of Spanish would be required, namely one  
51 appropriate for North America and one appropriate for Argentina. More specifically, the local  
52 investigators and translators determined that for some symptoms, language that would be  
53  
54  
55  
56  
57  
58  
59  
60

1  
2  
3 commonly used and well understood in one region would not be commonly used or well  
4 understood in the other region. In addition, they identified regional differences in terms of  
5 grammatical structure and the use of voseo conjugation. Only the North American version is  
6 presented in this manuscript; the Argentinian version will be reported separately. Thus,  
7 enrollment sites for this report were The Hospital for Sick Children, Toronto, Canada and  
8 University of Texas Health Sciences Center San Antonio, San Antonio, United States.  
9  
10  
11  
12  
13  
14  
15

### 16 17 **Translation**

18  
19 Translation of SSPedi included four distinct steps, namely forward translation,  
20 reconciliation, back translation and back translation review. We followed the guiding principles  
21 for the translation and cultural adaptation process for patient-reported outcomes from the  
22 ISPOR Task Force.(13) The generic methods that will be used for SSPedi translations are  
23 provided as Appendix 1.  
24  
25  
26  
27  
28  
29

30 Forward translation involved the independent translation of SSPedi from English (source  
31 language) by two professional medical translators, at least one of whom resided in the country  
32 targeted for translation. Reconciliation between the translated versions of SSPedi occurred via a  
33 translation panel, which consisted of investigators from the enrollment sites, both translators  
34 and the Toronto-based team. The Toronto-based research team included one pediatric  
35 oncologist, one pediatric pharmacist, one clinical research manager and one clinical research  
36 project assistant.  
37  
38  
39  
40  
41  
42  
43  
44

45 Next, the product of reconciliation was back translated to English by a third translator who  
46 did not have knowledge of English SSPedi and who was a native English speaker. The  
47 translation panel then reviewed the back translation against the source instrument to identify  
48 any discrepancies in meaning.  
49  
50  
51  
52

53 In addition to translating SSPedi itself, the professional medical translators also translated  
54 the synonym list. The synonym list was created for the English version of SSPedi to facilitate  
55  
56  
57  
58  
59  
60

1  
2  
3 child self-report. It provides alternative words for each SSPedi symptom and was derived  
4 primarily through cognitive interviews with children themselves. Examples of synonyms for “te  
5 sientes decepcionado” included “te sientes desilusionado”, “desencantado” and “fastidiado”.  
6  
7  
8  
9

## 10 11 **Cognitive Interviewing**

12  
13 *Overview:* The interviews were audio-recorded and sent to Toronto for evaluation and  
14 adjudication. The goals were to determine whether children found the Spanish translated  
15 version of SSPedi difficult to understand, whether they incorrectly understood it, and whether  
16 there were cultural issues with the instrument. Interviews were conducted by trained research  
17 associates or nurses with experience in cognitive interviewing who are fluent in Spanish and  
18 English.  
19  
20  
21  
22  
23  
24  
25  
26  
27

28  
29 *Eligibility Criteria:* Children were eligible to participate if they were 8 to 18 years of age; they had  
30 a diagnosis of cancer or were HSCT recipients; and Spanish was their first language  
31 (permissible for both English and Spanish to be their first language). We excluded participants  
32 who had visual or cognitive impairments that precluded completion of SSPedi according to their  
33 healthcare provider.  
34  
35  
36  
37  
38  
39  
40

41  
42 *Primary and Secondary Outcome Measures:* Children self-reported difficulty with understanding  
43 using a 5-point Likert scale while cognitive interviews identified incorrect understanding of  
44 SSPedi items using a 4-point Likert scale. Cultural relevance was assessed qualitatively.  
45  
46  
47  
48

49  
50 *Procedures:* Sampling was purposive to ensure that children of varying age, underlying  
51 diagnosis and gender were included. Potential participants were identified on the inpatient ward  
52 or outpatient clinic by the healthcare team. Upon confirmation of eligibility, the patient or family  
53 was approached to request participation in this study.  
54  
55  
56  
57



1  
2  
3 First, the respondent completed the translated version of SSPedi on paper in the presence  
4 of the interviewer. SSPedi could be read aloud if the child was having difficulty with reading.  
5 Child respondents rated how easy or hard the translated version of SSPedi was to understand  
6 using a 5-point Likert scale ranging from 1="very hard" to 5="very easy". The instrument overall,  
7 each of the 15 items and the response scale were evaluated. We reported the number of  
8 children who found SSPedi hard or very hard to understand (score of 1 or 2). We also evaluated  
9 the child's understanding of each item and the response scale using cognitive probing. Both the  
10 interviewer and an independent rater in Toronto who listened to the audio-recording adjudicated  
11 understanding using a 4-point Likert scale ranging from 1="completely incorrect" to  
12 4="completely correct". Discrepancies were resolved by consensus. We described the number  
13 of items that were rated as partially or completely incorrect (score of 1 or 2). Next, we asked  
14 children whether any questions within SSPedi did not make sense to them in thinking about  
15 their day-to-day life in order to assess cultural relevance. These data were evaluated by the  
16 Toronto rater and dichotomized into issues with cultural relevance identified vs. not identified.  
17 Finally, we asked whether any important symptoms were missing from Spanish SSPedi.  
18 Children could have responded to questions in English or Spanish according to their preference.

19  
20  
21  
22  
23  
24  
25  
26  
27  
28  
29  
30  
31  
32  
33  
34  
35  
36  
37 After each group of five children were interviewed, the study team met to review the  
38 responses to identify whether the translated version of SSPedi should be modified. Modification  
39 could be made to the script, the instrument itself or a synonym list of terms available for each  
40 SSPedi item. Formal evaluation of difficulty with understanding and incorrect understanding was  
41 performed after each group of 10 children were interviewed (considered one iteration).

42  
43  
44  
45  
46  
47  
48  
49  
50  
51  
52  
53  
54  
55  
56  
57  
58  
59  
60  
Criteria to consider Spanish SSPedi satisfactory were as follows: no more than one of the  
last 10 participants found the entire instrument and each item hard to understand, no more than  
one of the last 10 participants were incorrect in their understanding of each item as adjudicated  
by the raters, and other comments including those pertaining to cultural relevance did not  
suggest that modification was required. Sample size was based upon the suggestion that seven

1  
2  
3 to 10 interviews are sufficient to determine understandability of an item.(14) We therefore  
4 intended to enroll up to 10-30 children to allow for up to three iterations consisting of 10 children  
5 each. All analyses were descriptive.  
6  
7  
8  
9

## 10 11 **Finalization**

12  
13 The final version of Spanish SSPedi was reviewed by all members of the translation panel  
14 to ensure cohesiveness and freedom from minor error. The final version was then formatted.  
15  
16  
17

## 18 19 **Patient and Public Involvement**

20  
21 No patients were involved in study design or conduct apart from being participants in the  
22 research.  
23  
24  
25  
26  
27

## 28 29 **RESULTS**

30  
31 Between January 2018 and April 2019, we identified 38 children and enrolled 20  
32 participants, at which point North American Spanish SSPedi was considered satisfactory (Figure  
33 1). Table 1 shows the demographics of the included participants. The number of children who  
34 were 8-10, 11-14 and 15-18 years of age were 4 (20%), 7 (35%) and 9 (45%) respectively. The  
35 most common types of Spanish spoken were Mexican (13, 65%) followed by Central American  
36 (2, 10%), South American (2, 10%) and other (3, 15%).  
37  
38  
39  
40  
41  
42  
43  
44  
45  
46  
47  
48  
49  
50  
51  
52  
53  
54  
55  
56  
57  
58  
59  
60

**Table 1: Demographic Characteristics of Participants Evaluating North American Spanish SSPedi**

|                              | Cohort 1<br>(n=10) | Cohort 2<br>(n=10) |
|------------------------------|--------------------|--------------------|
| Sex                          |                    |                    |
| Male                         | 6 (60%)            | 6 (60%)            |
| Female                       | 4 (40%)            | 4 (40%)            |
| Age in Years                 |                    |                    |
| 8-10                         | 1 (10%)            | 3 (30%)            |
| 11-14                        | 4 (40%)            | 3 (30%)            |
| 15-18                        | 5 (50%)            | 4 (40%)            |
| Diagnosis                    |                    |                    |
| Leukemia/lymphoma            | 9 (90%)            | 4 (40%)            |
| Solid tumor                  | 1 (10%)            | 3 (30%)            |
| Brain tumor                  | 0                  | 2 (20%)            |
| Other*                       | 0                  | 1 (10%)            |
| Metastatic Disease           | 0                  | 0                  |
| Relapse                      | 1 (10%)            | 1 (10%)            |
| Stem Cell Transplantation    | 1 (10%)            | 1 (10%)            |
| Active Treatment             | 7 (70%)            | 4 (40%)            |
| Born in Country of Interview | 6 (60%)            | 9 (90%)            |
| Type of Spanish Spoken       |                    |                    |
| Mexican                      | 5 (50%)            | 8 (80%)            |
| Central American             | 2 (20%)            | 0                  |
| South American               | 1 (10%)            | 1 (10%)            |
| Other                        | 2 (20%)            | 1 (10%)            |
| Inpatient at Interview       | 0                  | 1 (10%)            |
| Attending School             | 5 (50%)            | 9 (90%)            |

Abbreviation: SSPedi – Symptom Screening in Pediatrics Tool

\*Other - primary immunodeficiency (n=1)

None of the child respondents reported that it was hard or very hard to complete Spanish SSPedi overall. Table 2 shows self-reported difficulty with understanding and adjudicated incorrect understanding of SSPedi items. It shows that after enrolling the first 10 participants, two participants found two items (mouth sores and tingly or numb hands or feet) hard to understand and therefore, criteria were not met to consider that version satisfactory. Changes made were additions to the synonym list only, based on alternative words given by children during the interview process. No changes to the instrument itself were required. In the last 10

enrolled participants, at most one participant found each item hard to understand and none were incorrect in their understanding of each item. None of the respondents were incorrect in their understanding of the response scale. In terms of cultural relevance, no issues were identified by any of the 20 respondents. None of the children interviewed indicated that there were additional symptoms they felt were missing from the tool.

**Table 2: Self-reported Difficulty with Understanding and Rater-Adjudicated Incorrectness with North American Spanish SSPedi\***

|                                 | Cohort 1<br>(n=10) |           | Cohort 2<br>(n=10) |           |
|---------------------------------|--------------------|-----------|--------------------|-----------|
|                                 | Hard to Understand | Incorrect | Hard to Understand | Incorrect |
| Disappointed or Sad             | 0                  | 0         | 0                  | 0         |
| Scared or Worried               | 0                  | 0         | 0                  | 0         |
| Cranky or Angry                 | 1                  | 0         | 1                  | 0         |
| Difficulty Thinking/Remembering | 0                  | 0         | 1                  | 0         |
| Changes in your face/body       | 0                  | 0         | 1                  | 0         |
| Tired                           | 0                  | 0         | 0                  | 0         |
| Mouth sores                     | 2                  | 1         | 1                  | 0         |
| Headache                        | 0                  | 0         | 0                  | 0         |
| Hurt or Pain                    | 0                  | 1         | 0                  | 0         |
| Tingly or numb hands or feet    | 2                  | 0         | 1                  | 0         |
| Throwing Up                     | 0                  | 0         | 0                  | 0         |
| More or less hungry             | 0                  | 0         | 0                  | 0         |
| Changes in Taste                | 0                  | 0         | 1                  | 0         |
| Constipation                    | 0                  | 0         | 1                  | 0         |
| Diarrhea                        | 0                  | 0         | 0                  | 0         |

\* Hard = rated as hard or very hard to understand by participant  
Incorrect = rated as partially or completely incorrect by rater

Thus, after 20 participants, the North American Spanish version of SSPedi was considered satisfactory and appropriate for utilization. Figure 2 shows the final version.

## DISCUSSION

We translated a self-report symptom screening tool for pediatric patients with cancer and HSCT recipients named SSPedi into Spanish appropriate for use in North America. The final version was acceptable based upon self-reported difficulty with understanding, adjudicated incorrect understanding of different aspects of SSPedi and cultural relevance. Many patient-reported outcomes incorporated into oncology clinical trials are only validated in English,(15) leading to potential disparities in clinical trial participation. Consequently, translation into non-English languages should be a priority.

We found that at least two versions of Spanish SSPedi will be needed since Argentinian Spanish was considered sufficiently different from North American Spanish to require a distinct version. Interestingly, different quality of life instruments have taken alternate approaches to Spanish translation. For example, the developers of the PedsQL modules have chosen to translate Spanish for several different countries including the United States, Argentina, Columbia and Spain.(16) In contrast, the Patient-Reported Outcome Measurement Information System has a single Spanish translation version.(17)

We termed this version of Spanish SSPedi “North American” even though we did not include a site in Mexico. However, we noted that the majority of children self-identified their Spanish type as Mexican, thus providing reassurance that this version should be appropriate in that country. Ideally, further testing in Mexico would be conducted to confirm understandability and cultural relevance in that setting. Some could argue that North American Spanish is not a distinct form of Spanish as it reflects the Spanish spoken in several different originating countries. However, a study conducted in the United States or Canada is unlikely to use multiple versions of Spanish. Thus, creating a North America Spanish version addresses a practical clinical and research need in these geographic locations.

During the creation of English SSPedi, we found four items more difficult to understand by children 8-18 years of age, namely ‘changes in how your body and face look’, ‘tingly or numb

1  
2  
3 hands or feet', 'feeling more or less hungry than you usually do', and 'constipation (hard to  
4  
5 poop).(18) Interestingly, three of these four items were similarly hard to understand by at least  
6  
7 one participant in this current study focused on Spanish translation. This may suggest that  
8  
9 difficulty with understanding was not related to Spanish translation but rather, that these are  
10  
11 more difficult concepts for children in general to understand, particularly if respondents had no  
12  
13 previous experience with the symptom. This hypothesis is supported by the absence or limited  
14  
15 number of self-reported instruments for at least peripheral neuropathy among pediatric cancer  
16  
17 patients.(19)

18  
19  
20 The main implication of this work is that there is now a symptom assessment tool that can  
21  
22 be used among North American Spanish speaking children receiving cancer treatments. Given  
23  
24 known disparities based upon race, ethnicity and language,(20, 21) development of such a tool  
25  
26 may be an important step toward reducing disparities in terms of both clinical trial enrollment  
27  
28 and routine clinical care. Future efforts could evaluate barriers to utilization of the translated tool  
29  
30 as well as translating SSPedi to other Spanish-speaking populations.

31  
32  
33 The strengths of this study were conduct of the translation according to internationally  
34  
35 recognized standards (13) and evaluation in two countries. Other strengths include its multi-  
36  
37 center conduct to improve generalizability, multiple approaches to assessing understandability  
38  
39 to improve validity and use of external adjudicators to improve reliability. However, weaknesses  
40  
41 included enrollment of a limited number of children and in only two centers. Evaluation in other  
42  
43 locations and with additional children may influence the synonym list further although based  
44  
45 upon the initial results, it is less likely that changes to the instrument itself will be required. In  
46  
47 addition, throughout the SSPedi program, ease or difficulty in understanding has focused on the  
48  
49 number of children describing an item as hard or very hard to understand. Focusing on those  
50  
51 who find an item neither easy nor hard to understand could lead to different results.

52  
53  
54 In summary, we translated and finalized Spanish SSPedi appropriate for use in North  
55  
56 America based upon self-reported difficulty with understanding, adjudicated incorrect  
57  
58

1  
2  
3 understanding of different aspects of SSPedi and cultural relevance. This work is important as  
4 translation of patient-reported outcomes to non-English languages may reduce disparities in  
5 clinical trial enrollment and cancer care delivery. Future research will translate and evaluate  
6 SSPedi for use in Argentina and other Spanish-speaking countries.  
7  
8  
9  
10

## 11 12 13 **ACKNOWLEDGMENTS**

14 We thank all the translators who worked with us on this project and whose expertise and  
15 insights greatly assisted the translation and evaluation process.  
16  
17  
18  
19

## 20 21 22 **AUTHOR CONTRIBUTORSHIP**

23 LD and LS developed the study concept and design. EP, DN, CS, SG, GG, and GD were  
24 involved in data collection. LS drafted the manuscript. All authors EP, AG, AS, AML, DN, CS,  
25 SG, GG, GD, LD, and LS participated in data interpretation, reviewed, revised, and approved  
26 the manuscript.  
27  
28  
29  
30  
31

## 32 33 34 **COMPETING INTERESTS**

35 The authors declare that they have no competing interests.  
36  
37  
38  
39

## 40 41 **FUNDING**

42 This research received no specific grant from any funding agency in the public, commercial or  
43 not-for-profit sectors. LS is supported by a Canada Research Chair in Pediatric Oncology  
44 Supportive Care.  
45  
46  
47  
48  
49

## 50 51 **DATA SHARING**

52 The datasets used or analyzed during the current study are available from the corresponding  
53 author on reasonable request.  
54  
55  
56  
57

## FIGURE LEGEND

Figure 1: North American Spanish SSPedi Participant Flow Diagram

Figure 2: North American Spanish SSPedi

## REFERENCES

1. Baggott C, Dodd M, Kennedy C, et al. Changes in children's reports of symptom occurrence and severity during a course of myelosuppressive chemotherapy. *J Pediatr Oncol Nurs*. 2010;27(6):307-15. doi:10.1177/1043454210377619
2. Miller E, Jacob E, Hockenberry MJ. Nausea, pain, fatigue, and multiple symptoms in hospitalized children with cancer. *Oncol Nurs Forum*. 2011;38(5):E382-93. doi:10.1188/11.ONF.E382-E393
3. Poder U, Ljungman G, von Essen L. Parents' perceptions of their children's cancer-related symptoms during treatment: a prospective, longitudinal study. *J Pain Symptom Manage*. 2010;40(5):661-70. doi:10.1016/j.jpainsymman.2010.02.012
4. Loves R, Plenert E, Tomlinson V, et al. Changes in hunger among pediatric patients with cancer and hematopoietic stem cell transplantation recipients. *Support Care Cancer*. 2020. doi:10.1007/s00520-020-05425-w
5. Loves R, Plenert E, Tomlinson V, et al. Changes in taste among pediatric patients with cancer and hematopoietic stem cell transplantation recipients. *Qual Life Res*. 2019;28(11):2941-9. doi:10.1007/s11136-019-02242-5
6. Loves R, Tomlinson D, Baggott C, et al. Taste changes in children with cancer and hematopoietic stem cell transplant recipients. *Support Care Cancer*. 2019;27(6):2247-54. doi:10.1007/s00520-018-4509-2
7. Johnston DL, Hyslop S, Tomlinson D, et al. Describing symptoms using the Symptom Screening in Pediatrics Tool in hospitalized children with cancer and hematopoietic stem cell transplant recipients. *Cancer Med*. 2018;7(5):1750-5. doi:10.1002/cam4.1433
8. Dupuis LL, Johnston DL, Baggott C, et al. Validation of the Symptom Screening in Pediatrics Tool in Children Receiving Cancer Treatments. *J Natl Cancer Inst*. 2018;110(6):661-8. doi:10.1093/jnci/djx250
9. Dupuis LL, Ethier MC, Tomlinson D, et al. A systematic review of symptom assessment scales in children with cancer. *BMC Cancer*. 2012;12:430. doi:10.1186/1471-2407-12-430
10. Tomlinson D, Dupuis LL, Gibson P, et al. Initial development of the Symptom Screening in Pediatrics Tool (SSPedi). *Support Care Cancer*. 2014;22(1):71-5. doi:10.1007/s00520-013-1945-x
11. Gonzalez-Barrera A, Lopez M. Spanish is the most spoken non-English language in U.S. homes, even among non-Hispanics Washington, D.C.: Pew Research Center; 2013 [updated 20Jan2020]. [Available from: <https://www.pewresearch.org/fact-tank/2013/08/13/spanish-is-the-most-spoken-non-english-language-in-u-s-homes-even-among-non-hispanics/>.]
12. Yang L. Treatment of cultural differences in translation. *Studies in Literature and Language*. 2014;8(1):39-42. doi:10.3968/j.sll.1923156320140801.2941



- 1  
2  
3 13. Wild D, Grove A, Martin M, et al. Principles of Good Practice for the Translation and  
4 Cultural Adaptation Process for Patient-Reported Outcomes (PRO) Measures: report of the  
5 ISPOR Task Force for Translation and Cultural Adaptation. *Value Health*. 2005;8(2):94-104.  
6 doi:10.1111/j.1524-4733.2005.04054.x
- 7 14. Willis G, editor. *Cognitive Interviewing: A Tool for Improving Questionnaire Design*: Sage  
8 Publications; 2009.
- 9 15. Grant SR, Noticewala SS, Mainwaring W, et al. Non-English language validation of  
10 patient-reported outcome measures in cancer clinical trials. *Support Care Cancer*.  
11 2020;28(6):2503-5. doi:10.1007/s00520-020-05399-9
- 12 16. Varni JW. PedsQL Translations 2019 [updated 20Jan2020]. [Available from:  
13 <https://www.pedsql.org/translations.html>.]
- 14 17. HealthMeasures. Available Translations 2019 [updated 20Jan2020]. [Available from:  
15 [http://www.healthmeasures.net/explore-measurement-systems/promis/intro-to-promis/available-](http://www.healthmeasures.net/explore-measurement-systems/promis/intro-to-promis/available-translations/117-available-translations)  
16 [translations/117-available-translations](http://www.healthmeasures.net/explore-measurement-systems/promis/intro-to-promis/available-translations/117-available-translations).]
- 17 18. O'Sullivan C, Lee Dupuis L, Gibson P, et al. Evaluation of the electronic self-report  
18 Symptom Screening in Pediatrics Tool (SSPedi). *BMJ Support Palliat Care*. 2018;8(1):110-6.  
19 doi:10.1136/bmjspcare-2015-001084
- 20 19. Johnston DL, Sung L, Stark D, et al. A systematic review of patient-reported outcome  
21 measures of neuropathy in children, adolescents and young adults. *Support Care Cancer*.  
22 2016;24(9):3723-8. doi:10.1007/s00520-016-3199-x
- 23 20. Bhatia S. Disparities in cancer outcomes: lessons learned from children with cancer.  
24 *Pediatr Blood Cancer*. 2011;56(6):994-1002. doi:10.1002/pbc.23078
- 25 21. Vega WA, Rodriguez MA, Gruskin E. Health disparities in the Latino population.  
26 *Epidemiol Rev*. 2009;31:99-112. doi:10.1093/epirev/mxp008
- 27  
28  
29  
30  
31  
32  
33  
34  
35  
36  
37  
38  
39  
40  
41  
42  
43  
44  
45  
46  
47  
48  
49  
50  
51  
52  
53  
54  
55  
56  
57  
58  
59  
60

1  
2  
3 **Figure 1: North American Spanish SSPedi Participant Flow Diagram**  
4  
5  
6

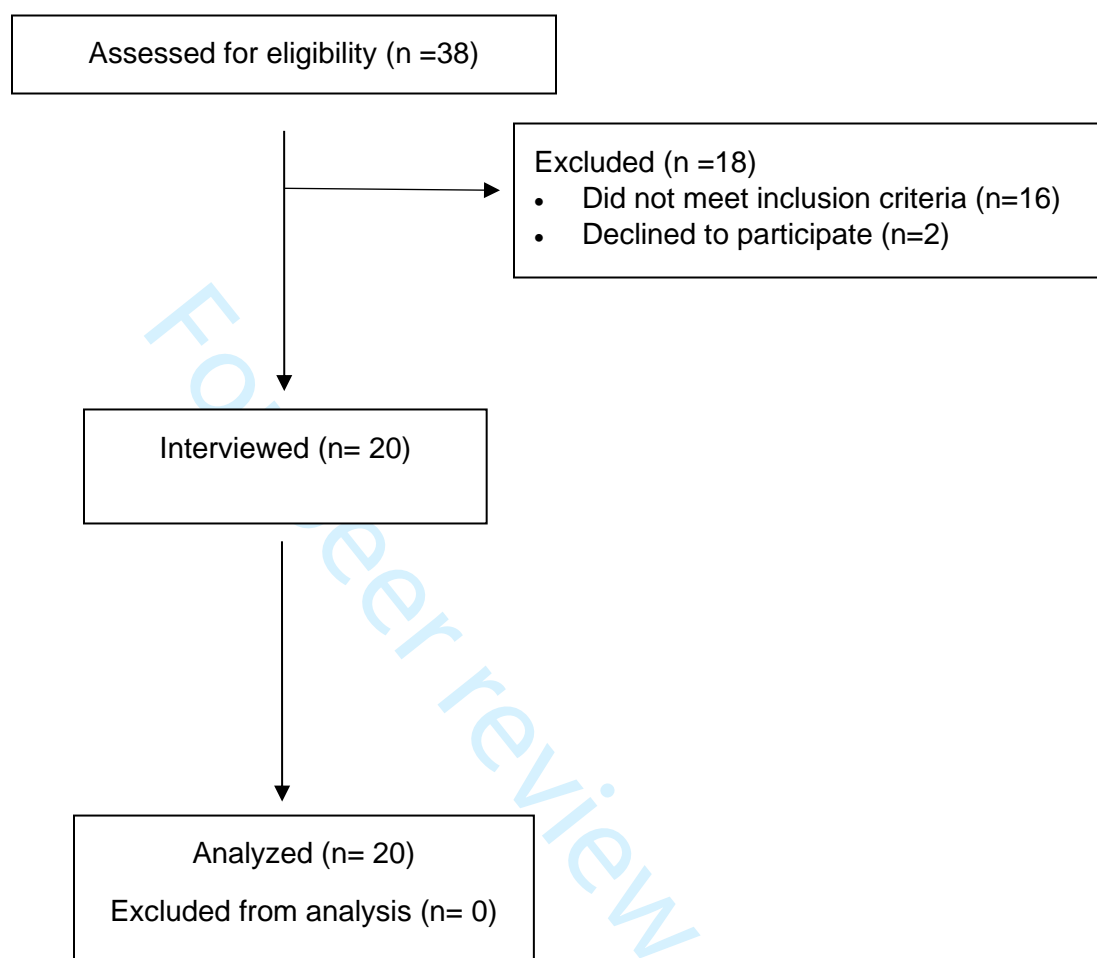

Figure 2: North American Spanish SSPedi

## Spanish SSPedi (North America): detección de síntomas en pediatría

Marca el círculo que mejor describe cuánto te **molestó** cada una de estas cosas **ayer u hoy**:

|                                                            | No me molestó para nada | Un poco               | Más o menos           | Mucho                 | Me molestó muchísimo  |
|------------------------------------------------------------|-------------------------|-----------------------|-----------------------|-----------------------|-----------------------|
| Te sientes decepcionado o triste                           | <input type="radio"/>   | <input type="radio"/> | <input type="radio"/> | <input type="radio"/> | <input type="radio"/> |
| Te sientes asustado o preocupado                           | <input type="radio"/>   | <input type="radio"/> | <input type="radio"/> | <input type="radio"/> | <input type="radio"/> |
| Estas de mal humor o enojado                               | <input type="radio"/>   | <input type="radio"/> | <input type="radio"/> | <input type="radio"/> | <input type="radio"/> |
| Te cuesta pensar o recordar cosas                          | <input type="radio"/>   | <input type="radio"/> | <input type="radio"/> | <input type="radio"/> | <input type="radio"/> |
| Notas algún cambio en el cuerpo o la cara                  | <input type="radio"/>   | <input type="radio"/> | <input type="radio"/> | <input type="radio"/> | <input type="radio"/> |
| Te sientes cansado                                         | <input type="radio"/>   | <input type="radio"/> | <input type="radio"/> | <input type="radio"/> | <input type="radio"/> |
| Tienes llagas en la boca                                   | <input type="radio"/>   | <input type="radio"/> | <input type="radio"/> | <input type="radio"/> | <input type="radio"/> |
| Tienes dolor de cabeza                                     | <input type="radio"/>   | <input type="radio"/> | <input type="radio"/> | <input type="radio"/> | <input type="radio"/> |
| Sientes malestar o dolor (que no sea dolor de cabeza)      | <input type="radio"/>   | <input type="radio"/> | <input type="radio"/> | <input type="radio"/> | <input type="radio"/> |
| Sientes hormigueo o entumecimiento en las manos o los pies | <input type="radio"/>   | <input type="radio"/> | <input type="radio"/> | <input type="radio"/> | <input type="radio"/> |
| Tienes vómitos o ganas de vomitar                          | <input type="radio"/>   | <input type="radio"/> | <input type="radio"/> | <input type="radio"/> | <input type="radio"/> |
| Tienes más o menos hambre que de costumbre                 | <input type="radio"/>   | <input type="radio"/> | <input type="radio"/> | <input type="radio"/> | <input type="radio"/> |
| Notas cambios en el gusto                                  | <input type="radio"/>   | <input type="radio"/> | <input type="radio"/> | <input type="radio"/> | <input type="radio"/> |
| Tienes estreñimiento (dificultad para hacer popó)          | <input type="radio"/>   | <input type="radio"/> | <input type="radio"/> | <input type="radio"/> | <input type="radio"/> |
| Tienes diarrea (popó aguada)                               | <input type="radio"/>   | <input type="radio"/> | <input type="radio"/> | <input type="radio"/> | <input type="radio"/> |

Cuéntanos cualquier otra cosa que te haya molestado recientemente y escríbelo aquí.

Fecha de la versión: 27 febrero 2018

## Appendix 1: Guidelines for Conducting Translation of SSPedi

| Step | Description                            | Details                                                                                                                                                                                                                                                                                                                                                                                                                                                                                                                                  |
|------|----------------------------------------|------------------------------------------------------------------------------------------------------------------------------------------------------------------------------------------------------------------------------------------------------------------------------------------------------------------------------------------------------------------------------------------------------------------------------------------------------------------------------------------------------------------------------------------|
| 1    | Forward translation                    | Two native speakers of the target language independently produce a forward translation of SSPedi from English into the target language. Both must be professional medical translators and at least one must reside in the country targeted for translation.                                                                                                                                                                                                                                                                              |
| 2    | Reconciliation of forward translations | Translation panel consists of the two forward translators and investigators from enrollment sites where translation will be tested. Discrepancies between translators identified and resolved by consensus. Goal is to produce a single translated version of the tool.                                                                                                                                                                                                                                                                  |
| 3    | Back translation                       | Forward translation is back translated into English by an independent translator. Back translator must be a native English speaker with no knowledge of English SSPedi.                                                                                                                                                                                                                                                                                                                                                                  |
| 4    | Back translation review                | Comparison of back translated version of SSPedi with original SSPedi tool by the research team to detect mistranslations or inaccuracies. Goal is to produce a final translated version of the tool ready for testing.                                                                                                                                                                                                                                                                                                                   |
| 5    | Cognitive interviewing                 | Goals are to determine if<br>a) SSPedi items and response scale are:<br><ul style="list-style-type: none"> <li>• Easy to understand as rated by children</li> <li>• Correctly interpreted as rated by the interviewer and a second adjudicator</li> </ul> b) there are any issues with cultural relevancy<br>A minimum of <b>10</b> children from target population must be enrolled.                                                                                                                                                    |
| 6    | Review interview findings              | Interview findings are summarized by iterations of 10 children. Translation panel decides whether revisions required or whether translated version is satisfactory. In general, criteria to consider the translation satisfactory are:<br>a) No more than one participants in the last 10 finds an item hard or very hard to understand<br>b) No more than one participant in the last 10 is incorrect in their understanding of an item<br>c) Comments do not indicate other modification or additions to the synonym list are required |
| 7    | <i>Further cognitive interviewing</i>  | <i>If any changes were made, additional cognitive interviews conducted in iterations of 10 children until the translated version is considered satisfactory</i>                                                                                                                                                                                                                                                                                                                                                                          |
| 8    | Finalization                           | The final translated version of SSPedi reviewed by the translation panel to ensure cohesiveness and freedom from minor error.                                                                                                                                                                                                                                                                                                                                                                                                            |

# BMJ Open

## Translating the Symptom Screening in Pediatrics Tool (SSPedi) into North American Spanish and Among Spanish-speaking Children Receiving Cancer Treatments, Evaluating Understandability and Cultural Relevance in a Multiple-Phase Descriptive Study

|                                 |                                                                                                                                                                                                                                                                                                                                                                                                                                                                                                                                                                                                                                                                                                                                                                                                                                                                                                                                                                                                                                                                                                                                                    |
|---------------------------------|----------------------------------------------------------------------------------------------------------------------------------------------------------------------------------------------------------------------------------------------------------------------------------------------------------------------------------------------------------------------------------------------------------------------------------------------------------------------------------------------------------------------------------------------------------------------------------------------------------------------------------------------------------------------------------------------------------------------------------------------------------------------------------------------------------------------------------------------------------------------------------------------------------------------------------------------------------------------------------------------------------------------------------------------------------------------------------------------------------------------------------------------------|
| Journal:                        | <i>BMJ Open</i>                                                                                                                                                                                                                                                                                                                                                                                                                                                                                                                                                                                                                                                                                                                                                                                                                                                                                                                                                                                                                                                                                                                                    |
| Manuscript ID                   | bmjopen-2020-037406.R2                                                                                                                                                                                                                                                                                                                                                                                                                                                                                                                                                                                                                                                                                                                                                                                                                                                                                                                                                                                                                                                                                                                             |
| Article Type:                   | Original research                                                                                                                                                                                                                                                                                                                                                                                                                                                                                                                                                                                                                                                                                                                                                                                                                                                                                                                                                                                                                                                                                                                                  |
| Date Submitted by the Author:   | 07-Aug-2020                                                                                                                                                                                                                                                                                                                                                                                                                                                                                                                                                                                                                                                                                                                                                                                                                                                                                                                                                                                                                                                                                                                                        |
| Complete List of Authors:       | Plenert, Erin; Hospital for Sick Children Research Institute, Child Health Evaluative Sciences<br>Grimes, Allison; University of Texas Health Science Center at San Antonio, Division of Hematology-Oncology<br>Sugalski, Aaron; University of Texas Health Science Center at San Antonio, Division of Hematology-Oncology<br>Langevin, Anne-Marie; University of Texas Health Science Center at San Antonio, Division of Hematology-Oncology<br>Nieto, Dominica; University of Texas Health Science Center at San Antonio, Division of Hematology-Oncology<br>Salaverria, Carmen; Hospital Nacional De Ninos Benjamin Bloom, Department of Oncology<br>Gomez, Sergio; Hospital de Niños Sor María Ludovica, Stem Cell Transplantation Unit<br>Gonzalez, Gisela; Hospital de Niños Sor María Ludovica, Stem Cell Transplantation Unit<br>D'Angelo, Gisela; Hospital de Niños Sor María Ludovica, Stem Cell Transplantation Unit<br>Dupuis, Lee; University of Toronto Leslie Dan Faculty of Pharmacy,<br>Sung, Lillian; Hospital for Sick Children, Division of Haematology/Oncology; Hospital for Sick Children SickKids Learning Institute, CHES |
| <b>Primary Subject Heading</b>: | Oncology                                                                                                                                                                                                                                                                                                                                                                                                                                                                                                                                                                                                                                                                                                                                                                                                                                                                                                                                                                                                                                                                                                                                           |
| Secondary Subject Heading:      | Paediatrics                                                                                                                                                                                                                                                                                                                                                                                                                                                                                                                                                                                                                                                                                                                                                                                                                                                                                                                                                                                                                                                                                                                                        |
| Keywords:                       | Paediatric oncology < ONCOLOGY, Bone marrow transplantation < HAEMATOLOGY, Paediatric oncology < PAEDIATRICES                                                                                                                                                                                                                                                                                                                                                                                                                                                                                                                                                                                                                                                                                                                                                                                                                                                                                                                                                                                                                                      |
|                                 |                                                                                                                                                                                                                                                                                                                                                                                                                                                                                                                                                                                                                                                                                                                                                                                                                                                                                                                                                                                                                                                                                                                                                    |

1  
2  
3  
4  
5  
6  
7  
8  
9  
10  
11  
12  
13  
14  
15  
16  
17  
18  
19  
20  
21  
22  
23  
24  
25  
26  
27  
28  
29  
30  
31  
32  
33  
34  
35  
36  
37  
38  
39  
40  
41  
42  
43  
44  
45  
46  
47  
48  
49  
50  
51  
52  
53  
54  
55  
56  
57  
58  
59  
60





I, the Submitting Author has the right to grant and does grant on behalf of all authors of the Work (as defined in the below author licence), an exclusive licence and/or a non-exclusive licence for contributions from authors who are: i) UK Crown employees; ii) where BMJ has agreed a CC-BY licence shall apply, and/or iii) in accordance with the terms applicable for US Federal Government officers or employees acting as part of their official duties; on a worldwide, perpetual, irrevocable, royalty-free basis to BMJ Publishing Group Ltd ("BMJ") its licensees and where the relevant Journal is co-owned by BMJ to the co-owners of the Journal, to publish the Work in this journal and any other BMJ products and to exploit all rights, as set out in our [licence](#).

The Submitting Author accepts and understands that any supply made under these terms is made by BMJ to the Submitting Author unless you are acting as an employee on behalf of your employer or a postgraduate student of an affiliated institution which is paying any applicable article publishing charge ("APC") for Open Access articles. Where the Submitting Author wishes to make the Work available on an Open Access basis (and intends to pay the relevant APC), the terms of reuse of such Open Access shall be governed by a Creative Commons licence – details of these licences and which [Creative Commons](#) licence will apply to this Work are set out in our licence referred to above.

Other than as permitted in any relevant BMJ Author's Self Archiving Policies, I confirm this Work has not been accepted for publication elsewhere, is not being considered for publication elsewhere and does not duplicate material already published. I confirm all authors consent to publication of this Work and authorise the granting of this licence.

1  
2  
3 TITLE: Translating the Symptom Screening in Pediatrics Tool (SSPedi) into North American  
4 Spanish and Among Spanish-speaking Children Receiving Cancer Treatments, Evaluating  
5 Understandability and Cultural Relevance in a Multiple-Phase Descriptive Study  
6  
7  
8  
9

10  
11 AUTHORS: Erin Plenert BA, MPH<sup>1</sup>; Allison Grimes MD, MSCI<sup>2</sup>; Aaron Sugalski DO<sup>2</sup>; Anne-  
12 Marie Langevin MD<sup>2</sup>; Dominica Nieto BA<sup>2</sup>; Carmen Salaverria MSc<sup>3</sup>; Sergio Gomez MD<sup>4</sup>; Gisela  
13 Gonzalez<sup>4</sup>; Gisela D'Angelo<sup>4</sup>; L. Lee Dupuis RPh, PhD<sup>1,5</sup>; Lillian Sung MD, PhD<sup>1,6</sup>  
14  
15  
16  
17  
18  
19

#### 20 AFFILIATIONS

21  
22 <sup>1</sup>Program in Child Health Evaluative Sciences, The Hospital for Sick Children, Peter Gilgan  
23 Centre for Research and Learning, 686 Bay Street, Toronto, Ontario, M5G 0A4, Canada  
24

25  
26 <sup>2</sup>Pediatric Hematology Oncology, University of Texas Health Science Center at San Antonio,  
27 7703 Floyd Curl Drive, San Antonio, TX, 78229, US  
28

29  
30 <sup>3</sup>Department of Oncology, Benjamin Bloom Children's Hospital, Bulevar De Los Heroes, San  
31 Salvador, El Salvador  
32

33  
34 <sup>4</sup>Stem Cell Transplantation Unit, Hospital de Niños Sor María Ludovica, Calle 14 1631, La Plata,  
35 Argentina  
36

37  
38 <sup>5</sup>Department of Pharmacy, The Hospital for Sick Children, 555 University Avenue, Toronto,  
39 Ontario, M5G 1X8, Canada  
40

41  
42 <sup>6</sup>Division of Haematology/Oncology, The Hospital for Sick Children, 555 University Avenue,  
43 Toronto, Ontario, M5G 1X8, Canada  
44  
45  
46  
47  
48  
49  
50  
51  
52  
53  
54  
55  
56  
57  
58  
59  
60



## CORRESPONDING AUTHOR:

Lillian Sung MD, PhD

Division of Haematology/Oncology

The Hospital for Sick Children

555 University Avenue

Toronto, Ontario

M5G 1X8

Telephone: 416-813-5287

Fax: 416-813-5979

Email: [lillian.sung@sickkids.ca](mailto:lillian.sung@sickkids.ca)

KEY WORDS: SSPedi, symptoms, translation, Spanish

WORD COUNTS: Abstract 270; Text 2,731; Tables 2; Figures 2; Appendix 1

## ABSTRACT

**Objectives:** Symptom screening is important to achieving symptom control. Symptom Screening in Pediatrics Tool (SSPedi) is validated for English-speaking children. Objectives were to translate SSPedi into Spanish, and to evaluate the understandability and cultural relevance of the translated version among Spanish-speaking children with cancer and pediatric hematopoietic stem cell transplant recipients.

**Methods:** We conducted a multi-phase, descriptive study to translate SSPedi into Spanish. The first step was to determine whether one Spanish version would be appropriate for both North America and Argentina. Once this decision was made, forward and backward translations were performed. The translated version was evaluated by Spanish-speaking children 8-18 years of age receiving cancer treatments.

**Primary and Secondary Outcome Measures:** Children self-reported difficulty with understanding using a 5-point Likert scale. Cognitive interviews identified incorrect understanding of SSPedi items using a 4-point Likert scale. Cultural relevance was assessed qualitatively.

**Results:** This report focuses on North American Spanish as a separate version will be required for Argentinian Spanish SSPedi. There were 20 children from Toronto and San Antonio included in cognitive interviews. The most common types of Spanish spoken were Mexican (13, 65%), Central American (2, 10%) and South American (2, 10%). No child reported that it was hard or very hard to complete Spanish SSPedi. Changes to the instrument itself were not required.

**Conclusions:** After enrollment of 20 respondents, the North American version of Spanish SSPedi was considered satisfactory based upon self-reported difficulty with understanding, adjudicated incorrect understanding and cultural relevance. We translated and finalized Spanish SSPedi appropriate for use in North America. Future research will translate and evaluate SSPedi for use in Argentina and other Spanish-speaking countries.

### STRENGTHS AND LIMITATIONS OF THIS STUDY

- Multi-center conduct is a strength as it improves generalizability of the study.
- Multiple approaches to assessing understandability is a strength as it improves robustness and validity of the findings.
- Use of external adjudicators is a strength as it improves reliability of the results.
- The study is limited by conduct in only two countries; this version of SSPedi may not be well-understood in other Spanish-speaking countries.

## BACKGROUND

Pediatric cancer patients experience prevalent and severely bothersome symptoms during treatment.(1-3) Common symptoms experienced include pain, nausea and fatigue.(1) More recent studies have also highlighted the prevalence of changes in hunger and taste as bothersome symptoms in this population.(4-7) Symptoms are important because there is strong correlation between increasing symptom burden and worse quality of life.(8) Active symptom screening and reporting are likely to be central in optimizing symptom control. Active symptom screening may identify symptoms early, improve communication of the extent of bother to the healthcare team and increase earlier and more consistent management strategies.

In prior research, we identified the lack of appropriate symptom screening measures for children with cancer based upon length, content validity or appropriateness (9) and consequently, developed a new instrument named the Symptom Screening in Pediatrics Tool (SSPedi).(10) SSPedi asks about the degree to which 15 symptoms bothered the child yesterday or today on a 5-point Likert scale. These symptoms are disappointed or sad, scared or worried, cranky or angry, problems thinking, body or face changes, tiredness, mouth sores, headache, other pain, tingling or numbness, throwing up, hunger changes, taste changes, constipation and diarrhea.

To evaluate the psychometric properties of SSPedi, we conducted a multi-center study with 502 English-speaking children with sites in both Canada and the United States. All children enrolled in the study were between the ages of 8-18 and were receiving cancer therapies. SSPedi was found to be reliable (internal consistency and test re-test and inter-rater reliability), valid (construct validity), and responsive to change.(10) More precisely, the intraclass correlation coefficients were 0.88 (95% confidence interval (CI) 0.82 to 0.92) for test re-test reliability, and 0.76 (95% CI 0.71 to 0.80) for inter-rater reliability between children and their parents. The mean difference in SSPedi scores between groups that were hypothesized to be more and less symptomatic was 7.8 (95% CI 6.4 to 9.2;  $P < 0.001$ ).(10) Construct validity was

1  
2  
3 demonstrated as all hypothesized relationships among measures were observed. SSPedi was  
4 responsive to change; those who reported they were much better or worse on a global symptom  
5 change scale had significantly changed from their baseline score (mean absolute difference 5.6,  
6 95% CI 3.8 to 7.5;  $P < 0.001$ ).  
7  
8  
9

10  
11 Translation into other languages will be an important component of SSPedi adoption within  
12 and outside of North America. We initially chose to focus translation on Spanish as it is a  
13 common first language of children in the United States.<sup>(11)</sup> The process of translation to  
14 Spanish must consider both cultural and linguistic perspectives.<sup>(12)</sup> Consequently, objectives  
15 were to translate SSPedi into Spanish and to evaluate the understandability and cultural  
16 relevance of the translated version of SSPedi among children with cancer and pediatric  
17 hematopoietic stem cell transplant (HSCT) recipients.  
18  
19  
20  
21  
22  
23  
24  
25  
26  
27

## 28 **METHODS**

29  
30 To translate SSPedi into Spanish, we conducted a multi-phase, descriptive study that was  
31 approved by The Hospital for Sick Children's Research Ethics Board (#1000057560) and the  
32 Research Ethics Boards of all participating sites. Written informed consent and verbal assent  
33 were obtained from all study participants or guardians (in the case of children providing assent).  
34 Both Spanish and English consent/assent forms were available. The following reflect the  
35 specific steps taken for translation of SSPedi into Spanish. The target countries were the United  
36 States, Canada and Argentina. We first determined whether one Spanish version would be  
37 appropriate for North America and Argentina by identification of a single translation that would  
38 be acceptable and understood in both regions. Next, we conducted translation followed by  
39 cognitive interviews as further described below.  
40  
41  
42  
43  
44  
45  
46  
47  
48  
49  
50

51 With Spanish-speaking investigators and translators from the United States, Canada and  
52 Argentina, we identified that at least two versions of Spanish would be required, namely one  
53 appropriate for North America and one appropriate for Argentina. More specifically, the local  
54  
55  
56  
57  
58  
59  
60

1  
2  
3 investigators and translators determined that for some symptoms, language that would be  
4 commonly used and well understood in one region would not be commonly used or well  
5 understood in the other region. In addition, they identified regional differences in terms of  
6 grammatical structure and the use of voseo conjugation. Voseo is the use of *vos* as a second-  
7 person singular pronoun, instead of, or alongside *tu*. In some countries such as Argentina, *vos*  
8 is the written and spoken standard. It can also be found in more casual speech in many other  
9 parts of Central and South America. Only the North American version is presented in this  
10 manuscript; the Argentinian version will be reported separately. Thus, enrollment sites for this  
11 report were The Hospital for Sick Children, Toronto, Canada and University of Texas Health  
12 Sciences Center San Antonio, San Antonio, United States.  
13  
14  
15  
16  
17  
18  
19  
20  
21  
22  
23  
24  
25  
26

## 27 Translation

28 Translation of SSPedi included four distinct steps, namely forward translation,  
29 reconciliation, back translation and back translation review. We followed the guiding principles  
30 for the translation and cultural adaptation process for patient-reported outcomes from the  
31 ISPOR Task Force.<sup>(13)</sup> The generic methods that will be used for SSPedi translations are  
32 provided as Appendix 1.  
33  
34  
35  
36  
37  
38

39 Forward translation involved the independent translation of SSPedi from English (source  
40 language) by two professional medical translators, at least one of whom resided in the country  
41 targeted for translation. Reconciliation between the translated versions of SSPedi occurred via a  
42 translation panel, which consisted of investigators from the enrollment sites, both translators  
43 and the Toronto-based team. The Toronto-based research team included one pediatric  
44 oncologist, one pediatric pharmacist, one clinical research manager and one clinical research  
45 project assistant.  
46  
47  
48  
49  
50  
51  
52  
53  
54  
55  
56  
57  
58  
59  
60

1  
2  
3 Next, the product of reconciliation was back translated to English by a third translator who  
4 did not have knowledge of English SSPedi and who was a native English speaker. The  
5 translation panel then reviewed the back translation against the source instrument to identify  
6 any discrepancies in meaning.  
7  
8  
9  
10

11 In addition to translating SSPedi itself, the professional medical translators also translated  
12 the synonym list. The synonym list was created for the English version of SSPedi to facilitate  
13 child self-report. It provides alternative words for each SSPedi symptom and was derived  
14 primarily through cognitive interviews with children themselves. Examples of synonyms for “te  
15 sientes decepcionado” (you feel disappointed) included “te sientes desilusionado” (you feel  
16 disillusioned) and “desencantado” (disenchanted).  
17  
18  
19  
20  
21  
22  
23  
24  
25

## 26 **Cognitive Interviewing**

27  
28 *Overview:* The interviews were audio-recorded and sent to Toronto for evaluation and  
29 adjudication. The goals were to determine whether children found the Spanish translated  
30 version of SSPedi difficult to understand, whether they incorrectly understood it, and whether  
31 there were cultural issues with the instrument. Interviews were conducted by trained research  
32 associates or nurses with experience in cognitive interviewing who are fluent in Spanish and  
33 English.  
34  
35  
36  
37  
38  
39  
40  
41  
42

43 *Eligibility Criteria:* Children were eligible to participate if they were 8 to 18 years of age; they had  
44 a diagnosis of cancer or were HSCT recipients; and Spanish was their first language  
45 (permissible for both English and Spanish to be their first language). We excluded participants  
46 who had visual or cognitive impairments that precluded completion of SSPedi according to their  
47 healthcare provider.  
48  
49  
50  
51  
52  
53  
54  
55  
56  
57  
58  
59  
60

1  
2  
3 *Primary and Secondary Outcome Measures:* Children self-reported difficulty with understanding  
4 using a 5-point Likert scale. Cognitive interviews identified incorrect understanding of SSPedi  
5 items using a 4-point Likert scale. Cultural relevance was assessed qualitatively.  
6  
7  
8  
9

10  
11 *Procedures:* Sampling was purposive to ensure that children of varying age, underlying  
12 diagnosis and gender were included. Potential participants were identified on the inpatient ward  
13 or outpatient clinic by the healthcare team. Upon confirmation of eligibility, the patient or family  
14 was approached to request participation in this study.  
15  
16  
17  
18  
19

20 First, the respondent completed the translated version of SSPedi on paper in the presence  
21 of the interviewer. SSPedi could be read aloud if the child was having difficulty with reading. We  
22 evaluated four aspects, namely ease or difficulty with understanding as reported by the child,  
23 correct or incorrect understanding as evaluated by two raters, cultural relevance and missing  
24 items. Child respondents rated how easy or hard the translated version of SSPedi was to  
25 understand using a 5-point Likert scale ranging from 1="very hard" to 5="very easy". The  
26 instrument overall, each of the 15 items and the response scale were evaluated. We reported  
27 the number of children who found SSPedi hard or very hard to understand (score of 1 or 2). We  
28 also evaluated the child's understanding of each item and the response scale using cognitive  
29 probing. Both the interviewer and an independent rater in Toronto who listened to the audio-  
30 recording adjudicated understanding using a 4-point Likert scale ranging from 1="completely  
31 incorrect" to 4="completely correct". Discrepancies were resolved by consensus. We described  
32 the number of items that were rated as partially or completely incorrect (score of 1 or 2). Next,  
33 we asked children whether any questions within SSPedi did not make sense to them in thinking  
34 about their day-to-day life in order to assess cultural relevance. These data were evaluated by  
35 the Toronto rater and dichotomized into issues with cultural relevance identified vs. not  
36 identified. Finally, we asked whether any important symptoms were missing from Spanish  
37  
38  
39  
40  
41  
42  
43  
44  
45  
46  
47  
48  
49  
50  
51  
52  
53  
54  
55  
56  
57  
58  
59  
60



1  
2  
3 SSPedi. Children could have responded to questions in English or Spanish according to their  
4  
5 preference.  
6  
7  
8

9 *Evaluation of Responses and Sample Size Justification:* After each group of five children were  
10 interviewed, the study team met to review the responses to identify whether the translated  
11 version of SSPedi should be modified. Modification could be made to the script, the instrument  
12 itself or a synonym list of terms available for each SSPedi item. Formal evaluation of difficulty  
13 with understanding and incorrect understanding was performed after each group of 10 children  
14 were interviewed (considered one iteration).  
15  
16  
17  
18  
19  
20  
21

22 Criteria to consider Spanish SSPedi satisfactory were as follows: no more than one of the  
23 last 10 participants found the entire instrument and each item hard to understand, no more than  
24 one of the last 10 participants were incorrect in their understanding of each item as adjudicated  
25 by the raters, and other comments including those pertaining to cultural relevance did not  
26 suggest that modification was required. Sample size was based upon the suggestion that seven  
27 to 10 interviews are sufficient to determine understandability of an item.<sup>(14)</sup> We therefore  
28 intended to enroll up to 10-30 children to allow for up to three iterations consisting of 10 children  
29 each. All analyses were descriptive.  
30  
31  
32  
33  
34  
35  
36  
37  
38  
39  
40

#### 41 **Finalization**

42  
43 The final version of Spanish SSPedi was reviewed by all members of the translation panel  
44 to ensure cohesiveness and freedom from minor error. The final version was then formatted.  
45  
46  
47  
48

#### 49 **Patient and Public Involvement**

50  
51 No patients were involved in study design or conduct apart from being participants in the  
52 research.  
53  
54  
55  
56  
57  
58  
59  
60

## RESULTS

Between January 2018 and April 2019, we identified 38 children and enrolled 20 participants (Figure 1). Table 1 shows the demographics of the included participants. The number of children who were 8-10, 11-14 and 15-18 years of age were 4 (20%), 7 (35%) and 9 (45%) respectively. The most common types of Spanish spoken were Mexican (13, 65%) followed by Central American (2, 10%), South American (2, 10%) and other (3, 15%). After enrollment of 20 children, the North American Spanish SSPedi was considered satisfactory

**Table 1: Demographic Characteristics of Participants Evaluating North American Spanish SSPedi**

|                              | Cohort 1<br>(n=10) | Cohort 2<br>(n=10) |
|------------------------------|--------------------|--------------------|
| Sex                          |                    |                    |
| Male                         | 6 (60%)            | 6 (60%)            |
| Female                       | 4 (40%)            | 4 (40%)            |
| Age in Years                 |                    |                    |
| 8-10                         | 1 (10%)            | 3 (30%)            |
| 11-14                        | 4 (40%)            | 3 (30%)            |
| 15-18                        | 5 (50%)            | 4 (40%)            |
| Diagnosis                    |                    |                    |
| Leukemia/lymphoma            | 9 (90%)            | 4 (40%)            |
| Solid tumor                  | 1 (10%)            | 3 (30%)            |
| Brain tumor                  | 0                  | 2 (20%)            |
| Other*                       | 0                  | 1 (10%)            |
| Metastatic Disease           | 0                  | 0                  |
| Relapse                      | 1 (10%)            | 1 (10%)            |
| Stem Cell Transplantation    | 1 (10%)            | 1 (10%)            |
| Active Treatment             | 7 (70%)            | 4 (40%)            |
| Born in Country of Interview | 6 (60%)            | 9 (90%)            |
| Type of Spanish Spoken       |                    |                    |
| Mexican                      | 5 (50%)            | 8 (80%)            |
| Central American             | 2 (20%)            | 0                  |
| South American               | 1 (10%)            | 1 (10%)            |
| Other                        | 2 (20%)            | 1 (10%)            |
| Inpatient at Interview       | 0                  | 1 (10%)            |
| Attending School             | 5 (50%)            | 9 (90%)            |

Abbreviation: SSPedi – Symptom Screening in Pediatrics Tool

\*Other - primary immunodeficiency (n=1)

None of the child respondents reported that it was hard or very hard to complete Spanish SSPedi overall. Table 2 shows self-reported difficulty with understanding and adjudicated incorrect understanding of SSPedi items. It shows that after enrolling the first 10 participants, two participants found two items (mouth sores and tingly or numb hands or feet) hard to understand and therefore, criteria were not met to consider that version satisfactory. Changes made were additions to the synonym list only, based on alternative words given by children during the interview process. No changes to the instrument itself were required. In the last 10

enrolled participants, at most one participant found each item hard to understand and none were incorrect in their understanding of each item. None of the respondents were incorrect in their understanding of the response scale. In terms of cultural relevance, no issues were identified by any of the 20 respondents. None of the children interviewed indicated that there were additional symptoms they felt were missing from the tool.

**Table 2: Self-reported Difficulty with Understanding and Rater-Adjudicated Incorrectness with North American Spanish SSPedi\***

|                                 | Cohort 1<br>(n=10) |           | Cohort 2<br>(n=10) |           |
|---------------------------------|--------------------|-----------|--------------------|-----------|
|                                 | Hard to Understand | Incorrect | Hard to Understand | Incorrect |
| Disappointed or Sad             | 0                  | 0         | 0                  | 0         |
| Scared or Worried               | 0                  | 0         | 0                  | 0         |
| Cranky or Angry                 | 1                  | 0         | 1                  | 0         |
| Difficulty Thinking/Remembering | 0                  | 0         | 1                  | 0         |
| Changes in your face/body       | 0                  | 0         | 1                  | 0         |
| Tired                           | 0                  | 0         | 0                  | 0         |
| Mouth sores                     | 2                  | 1         | 1                  | 0         |
| Headache                        | 0                  | 0         | 0                  | 0         |
| Hurt or Pain                    | 0                  | 1         | 0                  | 0         |
| Tingly or numb hands or feet    | 2                  | 0         | 1                  | 0         |
| Throwing Up                     | 0                  | 0         | 0                  | 0         |
| More or less hungry             | 0                  | 0         | 0                  | 0         |
| Changes in Taste                | 0                  | 0         | 1                  | 0         |
| Constipation                    | 0                  | 0         | 1                  | 0         |
| Diarrhea                        | 0                  | 0         | 0                  | 0         |

\* Hard = rated as hard or very hard to understand by participant  
Incorrect = rated as partially or completely incorrect by rater

Thus, after 20 participants, the North American Spanish version of SSPedi was considered satisfactory and appropriate for utilization. Figure 2 shows the final version.

## DISCUSSION

We translated a self-report symptom screening tool for pediatric patients with cancer and HSCT recipients named SSPedi into Spanish appropriate for use in North America. The final version was acceptable based upon self-reported difficulty with understanding, adjudicated incorrect understanding of different aspects of SSPedi and cultural relevance. Many patient-reported outcomes incorporated into oncology clinical trials are only validated in English,(15) leading to potential disparities in clinical trial participation. Consequently, translation into non-English languages should be a priority.

We found that at least two versions of Spanish SSPedi will be needed since Argentinian Spanish was considered sufficiently different from North American Spanish to require a distinct version. Interestingly, different quality of life instruments have taken alternate approaches to Spanish translation. For example, the developers of the PedsQL modules have chosen to translate Spanish for several different countries including the United States, Argentina, Columbia and Spain.(16) In contrast, the Patient-Reported Outcome Measurement Information System has a single Spanish translation version.(17) It is possible that the Argentinian version would be appropriate for other countries where voseo conjugation is prominent, such as several countries in Central America. However, we cannot be sure without explicit evaluation of the Argentinian version in those countries.

We termed this version of Spanish SSPedi “North American” even though we did not include a site in Mexico. However, we noted that the majority of children self-identified their Spanish type as Mexican, thus providing reassurance that this version should be appropriate in that country. Ideally, further testing in Mexico would be conducted to confirm understandability and cultural relevance in that setting. Some could argue that North American Spanish is not a distinct form of Spanish as it reflects the Spanish spoken in several different originating countries. However, a study conducted in the United States or Canada is unlikely to use multiple

1  
2  
3 versions of Spanish. Thus, creating a North America Spanish version addresses a practical  
4 clinical and research need in these geographic locations.  
5  
6

7 During the creation of English SSPedi, we found four items more difficult to understand by  
8 children 8-18 years of age, namely 'changes in how your body and face look', 'tingly or numb  
9 hands or feet', 'feeling more or less hungry than you usually do', and 'constipation (hard to  
10 poop).(18) Interestingly, three of these four items were similarly hard to understand by at least  
11 one participant in this current study focused on Spanish translation. This may suggest that  
12 difficulty with understanding was not related to Spanish translation but rather, that these are  
13 more difficult concepts for children in general to understand, particularly if respondents had no  
14 previous experience with the symptom. This hypothesis is supported by the absence or limited  
15 number of self-reported instruments for at least peripheral neuropathy among pediatric cancer  
16 patients.(19)  
17  
18  
19  
20  
21  
22  
23  
24  
25  
26  
27

28 The main implication of this work is that there is now a symptom assessment tool that can  
29 be used among North American Spanish speaking children receiving cancer treatments. Given  
30 known disparities based upon race, ethnicity and language,(20, 21) development of such a tool  
31 may be an important step toward reducing disparities in terms of both clinical trial enrollment  
32 and routine clinical care. Future efforts could evaluate barriers to utilization of the translated tool  
33 as well as translating SSPedi to other Spanish-speaking populations.  
34  
35  
36  
37  
38  
39  
40

41 The strengths of this study were conduct of the translation according to internationally  
42 recognized standards (13) and evaluation in two countries. Other strengths include its multi-  
43 center conduct to improve generalizability, multiple approaches to assessing understandability  
44 to improve validity and use of external adjudicators to improve reliability. However, weaknesses  
45 included enrollment of a limited number of children and in only two centers. Evaluation in other  
46 locations and with additional children may influence the synonym list further although based  
47 upon the initial results, it is less likely that changes to the instrument itself will be required. In  
48 addition, throughout the SSPedi program, ease or difficulty in understanding has focused on the  
49  
50  
51  
52  
53  
54  
55  
56  
57  
58  
59  
60

1  
2  
3 number of children describing an item as hard or very hard to understand. Focusing on those  
4 who find an item neither easy nor hard to understand could lead to different results.  
5  
6

7 In summary, we translated and finalized Spanish SSPedi appropriate for use in North  
8 America based upon self-reported difficulty with understanding, adjudicated incorrect  
9 understanding of different aspects of SSPedi and cultural relevance. This work is important as  
10 translation of patient-reported outcomes to non-English languages may reduce disparities in  
11 clinical trial enrollment and cancer care delivery. Future research will translate and evaluate  
12 SSPedi for use in Argentina and other Spanish-speaking countries.  
13  
14  
15  
16  
17  
18  
19  
20  
21

## 22 **ACKNOWLEDGMENTS**

23  
24 We thank all the translators who worked with us on this project and whose expertise and  
25 insights greatly assisted the translation and evaluation process.  
26  
27  
28  
29

## 30 **AUTHOR CONTRIBUTORSHIP**

31  
32 LD and LS developed the study concept and design. EP, DN, CS, SG, GG, and GD were  
33 involved in data collection. LS drafted the manuscript. All authors EP, AG, AS, AML, DN, CS,  
34 SG, GG, GD, LD, and LS participated in data interpretation, reviewed, revised, and approved  
35 the manuscript.  
36  
37  
38  
39  
40  
41  
42

## 43 **COMPETING INTERESTS**

44  
45 The authors declare that they have no competing interests.  
46  
47  
48  
49

## 50 **FUNDING**

51  
52 This research received no specific grant from any funding agency in the public, commercial or  
53 not-for-profit sectors. LS is supported by a Canada Research Chair in Pediatric Oncology  
54 Supportive Care.  
55  
56  
57  
58  
59  
60

## DATA SHARING

The datasets used or analyzed during the current study are available from the corresponding author on reasonable request.

## FIGURE LEGEND

Figure 1: North American Spanish SSPedi Participant Flow Diagram

Figure 2: North American Spanish SSPedi



## REFERENCES

1. Baggott C, Dodd M, Kennedy C, et al. Changes in children's reports of symptom occurrence and severity during a course of myelosuppressive chemotherapy. *J Pediatr Oncol Nurs*. 2010;27(6):307-15. doi:10.1177/1043454210377619
2. Miller E, Jacob E, Hockenberry MJ. Nausea, pain, fatigue, and multiple symptoms in hospitalized children with cancer. *Oncol Nurs Forum*. 2011;38(5):E382-93. doi:10.1188/11.ONF.E382-E393
3. Poder U, Ljungman G, von Essen L. Parents' perceptions of their children's cancer-related symptoms during treatment: a prospective, longitudinal study. *J Pain Symptom Manage*. 2010;40(5):661-70. doi:10.1016/j.jpainsymman.2010.02.012
4. Loves R, Plenert E, Tomlinson V, et al. Changes in hunger among pediatric patients with cancer and hematopoietic stem cell transplantation recipients. *Support Care Cancer*. 2020. doi:10.1007/s00520-020-05425-w
5. Loves R, Plenert E, Tomlinson V, et al. Changes in taste among pediatric patients with cancer and hematopoietic stem cell transplantation recipients. *Qual Life Res*. 2019;28(11):2941-9. doi:10.1007/s11136-019-02242-5
6. Loves R, Tomlinson D, Baggott C, et al. Taste changes in children with cancer and hematopoietic stem cell transplant recipients. *Support Care Cancer*. 2019;27(6):2247-54. doi:10.1007/s00520-018-4509-2
7. Johnston DL, Hyslop S, Tomlinson D, et al. Describing symptoms using the Symptom Screening in Pediatrics Tool in hospitalized children with cancer and hematopoietic stem cell transplant recipients. *Cancer Med*. 2018;7(5):1750-5. doi:10.1002/cam4.1433
8. Dupuis LL, Johnston DL, Baggott C, et al. Validation of the Symptom Screening in Pediatrics Tool in Children Receiving Cancer Treatments. *J Natl Cancer Inst*. 2018;110(6):661-8. doi:10.1093/jnci/djx250
9. Dupuis LL, Ethier MC, Tomlinson D, et al. A systematic review of symptom assessment scales in children with cancer. *BMC Cancer*. 2012;12:430. doi:10.1186/1471-2407-12-430
10. Tomlinson D, Dupuis LL, Gibson P, et al. Initial development of the Symptom Screening in Pediatrics Tool (SSPedi). *Support Care Cancer*. 2014;22(1):71-5. doi:10.1007/s00520-013-1945-x
11. Gonzalez-Barrera A, Lopez M. Spanish is the most spoken non-English language in U.S. homes, even among non-Hispanics Washington, D.C.: Pew Research Center; 2013 [updated 20Jan2020]. [Available from: <https://www.pewresearch.org/fact-tank/2013/08/13/spanish-is-the-most-spoken-non-english-language-in-u-s-homes-even-among-non-hispanics/>.]
12. Yang L. Treatment of cultural differences in translation. *Studies in Literature and Language*. 2014;8(1):39-42. doi:10.3968/j.sll.1923156320140801.2941
13. Wild D, Grove A, Martin M, et al. Principles of Good Practice for the Translation and Cultural Adaptation Process for Patient-Reported Outcomes (PRO) Measures: report of the ISPOR Task Force for Translation and Cultural Adaptation. *Value Health*. 2005;8(2):94-104. doi:10.1111/j.1524-4733.2005.04054.x
14. Willis G, editor. *Cognitive Interviewing: A Tool for Improving Questionnaire Design*: Sage Publications; 2009.
15. Grant SR, Noticewala SS, Mainwaring W, et al. Non-English language validation of patient-reported outcome measures in cancer clinical trials. *Support Care Cancer*. 2020;28(6):2503-5. doi:10.1007/s00520-020-05399-9
16. Varni JW. PedsQL Translations 2019 [updated 20Jan2020]. [Available from: <https://www.pedsql.org/translations.html>.]

- 1  
2  
3 17. HealthMeasures. Available Translations 2019 [updated 20Jan2020]. [Available from:  
4 [http://www.healthmeasures.net/explore-measurement-systems/promis/intro-to-promis/available-](http://www.healthmeasures.net/explore-measurement-systems/promis/intro-to-promis/available-translations/117-available-translations.)  
5 [translations/117-available-translations.](http://www.healthmeasures.net/explore-measurement-systems/promis/intro-to-promis/available-translations/117-available-translations.)]  
6  
7 18. O'Sullivan C, Lee Dupuis L, Gibson P, et al. Evaluation of the electronic self-report  
8 Symptom Screening in Pediatrics Tool (SSPedi). *BMJ Support Palliat Care*. 2018;8(1):110-6.  
9 doi:10.1136/bmjspcare-2015-001084  
10 19. Johnston DL, Sung L, Stark D, et al. A systematic review of patient-reported outcome  
11 measures of neuropathy in children, adolescents and young adults. *Support Care Cancer*.  
12 2016;24(9):3723-8. doi:10.1007/s00520-016-3199-x  
13 20. Bhatia S. Disparities in cancer outcomes: lessons learned from children with cancer.  
14 *Pediatr Blood Cancer*. 2011;56(6):994-1002. doi:10.1002/pbc.23078  
15 21. Vega WA, Rodriguez MA, Gruskin E. Health disparities in the Latino population.  
16 *Epidemiol Rev*. 2009;31:99-112. doi:10.1093/epirev/mxp008  
17  
18  
19  
20  
21  
22  
23  
24  
25  
26  
27  
28  
29  
30  
31  
32  
33  
34  
35  
36  
37  
38  
39  
40  
41  
42  
43  
44  
45  
46  
47  
48  
49  
50  
51  
52  
53  
54  
55  
56  
57  
58  
59  
60

1  
2  
3 **Figure 1: North American Spanish SSPedi Participant Flow Diagram**  
4  
5  
6



Figure 2: North American Spanish SSPedi

## Spanish SSPedi (North America): detección de síntomas en pediatría

Marca el círculo que mejor describe cuánto te **molestó** cada una de estas cosas **ayer u hoy**:

|                                                            | No me molestó para nada | Un poco               | Más o menos           | Mucho                 | Me molestó muchísimo  |
|------------------------------------------------------------|-------------------------|-----------------------|-----------------------|-----------------------|-----------------------|
| Te sientes decepcionado o triste                           | <input type="radio"/>   | <input type="radio"/> | <input type="radio"/> | <input type="radio"/> | <input type="radio"/> |
| Te sientes asustado o preocupado                           | <input type="radio"/>   | <input type="radio"/> | <input type="radio"/> | <input type="radio"/> | <input type="radio"/> |
| Estas de mal humor o enojado                               | <input type="radio"/>   | <input type="radio"/> | <input type="radio"/> | <input type="radio"/> | <input type="radio"/> |
| Te cuesta pensar o recordar cosas                          | <input type="radio"/>   | <input type="radio"/> | <input type="radio"/> | <input type="radio"/> | <input type="radio"/> |
| Notas algún cambio en el cuerpo o la cara                  | <input type="radio"/>   | <input type="radio"/> | <input type="radio"/> | <input type="radio"/> | <input type="radio"/> |
| Te sientes cansado                                         | <input type="radio"/>   | <input type="radio"/> | <input type="radio"/> | <input type="radio"/> | <input type="radio"/> |
| Tienes llagas en la boca                                   | <input type="radio"/>   | <input type="radio"/> | <input type="radio"/> | <input type="radio"/> | <input type="radio"/> |
| Tienes dolor de cabeza                                     | <input type="radio"/>   | <input type="radio"/> | <input type="radio"/> | <input type="radio"/> | <input type="radio"/> |
| Sientes malestar o dolor (que no sea dolor de cabeza)      | <input type="radio"/>   | <input type="radio"/> | <input type="radio"/> | <input type="radio"/> | <input type="radio"/> |
| Sientes hormigueo o entumecimiento en las manos o los pies | <input type="radio"/>   | <input type="radio"/> | <input type="radio"/> | <input type="radio"/> | <input type="radio"/> |
| Tienes vómitos o ganas de vomitar                          | <input type="radio"/>   | <input type="radio"/> | <input type="radio"/> | <input type="radio"/> | <input type="radio"/> |
| Tienes más o menos hambre que de costumbre                 | <input type="radio"/>   | <input type="radio"/> | <input type="radio"/> | <input type="radio"/> | <input type="radio"/> |
| Notas cambios en el gusto                                  | <input type="radio"/>   | <input type="radio"/> | <input type="radio"/> | <input type="radio"/> | <input type="radio"/> |
| Tienes estreñimiento (dificultad para hacer popó)          | <input type="radio"/>   | <input type="radio"/> | <input type="radio"/> | <input type="radio"/> | <input type="radio"/> |
| Tienes diarrea (popó aguada)                               | <input type="radio"/>   | <input type="radio"/> | <input type="radio"/> | <input type="radio"/> | <input type="radio"/> |

Cuéntanos cualquier otra cosa que te haya molestado recientemente y escríbelo aquí.

Fecha de la versión: 27 febrero 2018

## Appendix 1: Guidelines for Conducting Translation of SSPedi

| Step | Description                            | Details                                                                                                                                                                                                                                                                                                                                                                                                                                                                                                                                                                                             |
|------|----------------------------------------|-----------------------------------------------------------------------------------------------------------------------------------------------------------------------------------------------------------------------------------------------------------------------------------------------------------------------------------------------------------------------------------------------------------------------------------------------------------------------------------------------------------------------------------------------------------------------------------------------------|
| 1    | Forward translation                    | Two native speakers of the target language independently produce a forward translation of SSPedi from English into the target language. Both must be professional medical translators and at least one must reside in the country targeted for translation.                                                                                                                                                                                                                                                                                                                                         |
| 2    | Reconciliation of forward translations | Translation panel consists of the two forward translators and investigators from enrollment sites where translation will be tested. Discrepancies between translators identified and resolved by consensus. Goal is to produce a single translated version of the tool.                                                                                                                                                                                                                                                                                                                             |
| 3    | Back translation                       | Forward translation is back translated into English by an independent translator. Back translator must be a native English speaker with no knowledge of English SSPedi.                                                                                                                                                                                                                                                                                                                                                                                                                             |
| 4    | Back translation review                | Comparison of back translated version of SSPedi with original SSPedi tool by the research team to detect mistranslations or inaccuracies. Goal is to produce a final translated version of the tool ready for testing.                                                                                                                                                                                                                                                                                                                                                                              |
| 5    | Cognitive interviewing                 | Goals are to determine if<br>a) SSPedi items and response scale are: <ul style="list-style-type: none"> <li>• Easy to understand as rated by children</li> <li>• Correctly interpreted as rated by the interviewer and a second adjudicator</li> </ul> b) there are any issues with cultural relevancy<br>A minimum of <b>10</b> children from target population must be enrolled.                                                                                                                                                                                                                  |
| 6    | Review interview findings              | Interview findings are summarized by iterations of 10 children. Translation panel decides whether revisions required or whether translated version is satisfactory. In general, criteria to consider the translation satisfactory are: <ol style="list-style-type: none"> <li>a) No more than one participants in the last 10 finds an item hard or very hard to understand</li> <li>b) No more than one participant in the last 10 is incorrect in their understanding of an item</li> <li>c) Comments do not indicate other modification or additions to the synonym list are required</li> </ol> |
| 7    | <i>Further cognitive interviewing</i>  | <i>If any changes were made, additional cognitive interviews conducted in iterations of 10 children until the translated version is considered satisfactory</i>                                                                                                                                                                                                                                                                                                                                                                                                                                     |
| 8    | Finalization                           | The final translated version of SSPedi reviewed by the translation panel to ensure cohesiveness and freedom from minor error.                                                                                                                                                                                                                                                                                                                                                                                                                                                                       |

# BMJ Open

## Translating the Symptom Screening in Pediatrics Tool (SSPedi) into North American Spanish and Among Spanish-speaking Children Receiving Cancer Treatments, Evaluating Understandability and Cultural Relevance in a Multiple-Phase Descriptive Study

|                                 |                                                                                                                                                                                                                                                                                                                                                                                                                                                                                                                                                                                                                                                                                                                                                                                                                                                                                                                                                                                                                                                                                                                                                    |
|---------------------------------|----------------------------------------------------------------------------------------------------------------------------------------------------------------------------------------------------------------------------------------------------------------------------------------------------------------------------------------------------------------------------------------------------------------------------------------------------------------------------------------------------------------------------------------------------------------------------------------------------------------------------------------------------------------------------------------------------------------------------------------------------------------------------------------------------------------------------------------------------------------------------------------------------------------------------------------------------------------------------------------------------------------------------------------------------------------------------------------------------------------------------------------------------|
| Journal:                        | <i>BMJ Open</i>                                                                                                                                                                                                                                                                                                                                                                                                                                                                                                                                                                                                                                                                                                                                                                                                                                                                                                                                                                                                                                                                                                                                    |
| Manuscript ID                   | bmjopen-2020-037406.R3                                                                                                                                                                                                                                                                                                                                                                                                                                                                                                                                                                                                                                                                                                                                                                                                                                                                                                                                                                                                                                                                                                                             |
| Article Type:                   | Original research                                                                                                                                                                                                                                                                                                                                                                                                                                                                                                                                                                                                                                                                                                                                                                                                                                                                                                                                                                                                                                                                                                                                  |
| Date Submitted by the Author:   | 28-Sep-2020                                                                                                                                                                                                                                                                                                                                                                                                                                                                                                                                                                                                                                                                                                                                                                                                                                                                                                                                                                                                                                                                                                                                        |
| Complete List of Authors:       | Plenert, Erin; Hospital for Sick Children Research Institute, Child Health Evaluative Sciences<br>Grimes, Allison; University of Texas Health Science Center at San Antonio, Division of Hematology-Oncology<br>Sugalski, Aaron; University of Texas Health Science Center at San Antonio, Division of Hematology-Oncology<br>Langevin, Anne-Marie; University of Texas Health Science Center at San Antonio, Division of Hematology-Oncology<br>Nieto, Dominica; University of Texas Health Science Center at San Antonio, Division of Hematology-Oncology<br>Salaverria, Carmen; Hospital Nacional De Ninos Benjamin Bloom, Department of Oncology<br>Gomez, Sergio; Hospital de Niños Sor María Ludovica, Stem Cell Transplantation Unit<br>Gonzalez, Gisela; Hospital de Niños Sor María Ludovica, Stem Cell Transplantation Unit<br>D'Angelo, Gisela; Hospital de Niños Sor María Ludovica, Stem Cell Transplantation Unit<br>Dupuis, Lee; University of Toronto Leslie Dan Faculty of Pharmacy,<br>Sung, Lillian; Hospital for Sick Children, Division of Haematology/Oncology; Hospital for Sick Children SickKids Learning Institute, CHES |
| <b>Primary Subject Heading</b>: | Oncology                                                                                                                                                                                                                                                                                                                                                                                                                                                                                                                                                                                                                                                                                                                                                                                                                                                                                                                                                                                                                                                                                                                                           |
| Secondary Subject Heading:      | Paediatrics                                                                                                                                                                                                                                                                                                                                                                                                                                                                                                                                                                                                                                                                                                                                                                                                                                                                                                                                                                                                                                                                                                                                        |
| Keywords:                       | Paediatric oncology < ONCOLOGY, Bone marrow transplantation < HAEMATOLOGY, Paediatric oncology < PAEDIATRICS                                                                                                                                                                                                                                                                                                                                                                                                                                                                                                                                                                                                                                                                                                                                                                                                                                                                                                                                                                                                                                       |
|                                 |                                                                                                                                                                                                                                                                                                                                                                                                                                                                                                                                                                                                                                                                                                                                                                                                                                                                                                                                                                                                                                                                                                                                                    |

1  
2  
3  
4  
5  
6  
7  
8  
9  
10  
11  
12  
13  
14  
15  
16  
17  
18  
19  
20  
21  
22  
23  
24  
25  
26  
27  
28  
29  
30  
31  
32  
33  
34  
35  
36  
37  
38  
39  
40  
41  
42  
43  
44  
45  
46  
47  
48  
49  
50  
51  
52  
53  
54  
55  
56  
57  
58  
59  
60

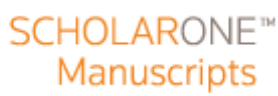



I, the Submitting Author has the right to grant and does grant on behalf of all authors of the Work (as defined in the below author licence), an exclusive licence and/or a non-exclusive licence for contributions from authors who are: i) UK Crown employees; ii) where BMJ has agreed a CC-BY licence shall apply, and/or iii) in accordance with the terms applicable for US Federal Government officers or employees acting as part of their official duties; on a worldwide, perpetual, irrevocable, royalty-free basis to BMJ Publishing Group Ltd ("BMJ") its licensees and where the relevant Journal is co-owned by BMJ to the co-owners of the Journal, to publish the Work in this journal and any other BMJ products and to exploit all rights, as set out in our [licence](#).

The Submitting Author accepts and understands that any supply made under these terms is made by BMJ to the Submitting Author unless you are acting as an employee on behalf of your employer or a postgraduate student of an affiliated institution which is paying any applicable article publishing charge ("APC") for Open Access articles. Where the Submitting Author wishes to make the Work available on an Open Access basis (and intends to pay the relevant APC), the terms of reuse of such Open Access shall be governed by a Creative Commons licence – details of these licences and which [Creative Commons](#) licence will apply to this Work are set out in our licence referred to above.

Other than as permitted in any relevant BMJ Author's Self Archiving Policies, I confirm this Work has not been accepted for publication elsewhere, is not being considered for publication elsewhere and does not duplicate material already published. I confirm all authors consent to publication of this Work and authorise the granting of this licence.



1  
2  
3 TITLE: Translating the Symptom Screening in Pediatrics Tool (SSPedi) into North American  
4 Spanish and Among Spanish-speaking Children Receiving Cancer Treatments, Evaluating  
5 Understandability and Cultural Relevance in a Multiple-Phase Descriptive Study  
6  
7  
8  
9

10  
11 AUTHORS: Erin Plenert BA, MPH<sup>1</sup>; Allison Grimes MD, MSCI<sup>2</sup>; Aaron Sugalski DO<sup>2</sup>; Anne-  
12 Marie Langevin MD<sup>2</sup>; Dominica Nieto BA<sup>2</sup>; Carmen Salaverria MSc<sup>3</sup>; Sergio Gomez MD<sup>4</sup>; Gisela  
13 Gonzalez<sup>4</sup>; Gisela D'Angelo<sup>4</sup>; L. Lee Dupuis RPh, PhD<sup>1,5</sup>; Lillian Sung MD, PhD<sup>1,6</sup>  
14  
15  
16  
17  
18  
19

#### 20 AFFILIATIONS

21  
22 <sup>1</sup>Program in Child Health Evaluative Sciences, The Hospital for Sick Children, Peter Gilgan  
23 Centre for Research and Learning, 686 Bay Street, Toronto, Ontario, M5G 0A4, Canada  
24

25  
26 <sup>2</sup>Pediatric Hematology Oncology, University of Texas Health Science Center at San Antonio,  
27 7703 Floyd Curl Drive, San Antonio, TX, 78229, US  
28

29  
30 <sup>3</sup>Department of Oncology, Benjamin Bloom Children's Hospital, Bulevar De Los Heroes, San  
31 Salvador, El Salvador  
32

33  
34 <sup>4</sup>Stem Cell Transplantation Unit, Hospital de Niños Sor María Ludovica, Calle 14 1631, La Plata,  
35 Argentina  
36

37  
38 <sup>5</sup>Department of Pharmacy, The Hospital for Sick Children, 555 University Avenue, Toronto,  
39 Ontario, M5G 1X8, Canada  
40

41  
42 <sup>6</sup>Division of Haematology/Oncology, The Hospital for Sick Children, 555 University Avenue,  
43 Toronto, Ontario, M5G 1X8, Canada  
44  
45  
46  
47  
48  
49  
50  
51  
52  
53  
54  
55  
56  
57  
58  
59  
60

## CORRESPONDING AUTHOR:

Lillian Sung MD, PhD

Division of Haematology/Oncology

The Hospital for Sick Children

555 University Avenue

Toronto, Ontario

M5G 1X8

Telephone: 416-813-5287

Fax: 416-813-5979

Email: [lillian.sung@sickkids.ca](mailto:lillian.sung@sickkids.ca)

KEY WORDS: SSPedi, symptoms, translation, Spanish

WORD COUNTS: Abstract 276; Text 2,747; Tables 2; Figures 2; Appendix 1

## ABSTRACT

**Objectives:** Symptom screening is important to achieving symptom control. Symptom Screening in Pediatrics Tool (SSPedi) is validated for English-speaking children. Objectives were to translate SSPedi into Spanish, and to evaluate the understandability and cultural relevance of the translated version among Spanish-speaking children with cancer and pediatric hematopoietic stem cell transplant recipients.

**Methods:** We conducted a multi-phase, descriptive study to translate SSPedi into Spanish. The first step was to determine whether one Spanish version would be appropriate for both North America and Argentina. Once this decision was made, forward and backward translations were performed. The translated version was evaluated by Spanish-speaking children 8-18 years of age receiving cancer treatments.

**Primary and Secondary Outcome Measures:** Primary outcome was child self-reported difficulty with understanding of the entire instrument and each symptom using a 5-point Likert scale. Secondary outcomes were incorrect understanding of SSPedi items identified by cognitive interviews with the children using a 4-point Likert scale and cultural relevance, which was assessed qualitatively.

**Results:** This report focuses on North American Spanish as a separate version will be required for Argentinian Spanish SSPedi based on different common vocabulary and grammatical structure. There were 20 children from Toronto and San Antonio included in cognitive interviews. The most common types of Spanish spoken were Mexican (13, 65%), Central American (2, 10%) and South American (2, 10%). No child reported that it was hard or very hard to complete Spanish SSPedi. Changes to the instrument itself were not required based upon understanding or cultural relevance.

**Conclusions:** We translated and finalized Spanish SSPedi appropriate for use in North America. Future research will translate and evaluate SSPedi for use in Argentina and other Spanish-speaking countries.

## STRENGTHS AND LIMITATIONS OF THIS STUDY

- Multi-center conduct is a strength as it improves generalizability of the study.
- Multiple approaches to assessing understandability is a strength as it improves robustness and validity of the findings.
- Use of external adjudicators is a strength as it improves reliability of the results.
- The study is limited by conduct in only two countries; this version of SSPedi may not be well-understood in other Spanish-speaking countries.

## BACKGROUND

Pediatric cancer patients experience prevalent and severely bothersome symptoms during treatment.(1-3) Common symptoms experienced include pain, nausea and fatigue.(1) More recent studies have also highlighted the prevalence of changes in hunger and taste as bothersome symptoms in this population.(4-7) Symptoms are important because there is strong correlation between increasing symptom burden and worse quality of life.(8) Active symptom screening and reporting are likely to be central in optimizing symptom control. Active symptom screening may identify symptoms early, improve communication of the extent of bother to the healthcare team and increase earlier and more consistent management strategies.

In prior research, we identified the lack of appropriate symptom screening measures for children with cancer based upon length, content validity or appropriateness(9) and consequently, developed a new instrument named the Symptom Screening in Pediatrics Tool (SSPedi).(10) SSPedi asks about the degree to which 15 symptoms bothered the child yesterday or today on a 5-point Likert scale. These symptoms are disappointed or sad, scared or worried, cranky or angry, problems thinking, body or face changes, tiredness, mouth sores, headache, other pain, tingling or numbness, throwing up, hunger changes, taste changes, constipation and diarrhea.

To evaluate the psychometric properties of SSPedi, we conducted a multi-center study with 502 English-speaking children with sites in both Canada and the United States. All children enrolled in the study were between the ages of 8-18 and were receiving cancer therapies. SSPedi was found to be reliable (internal consistency and test re-test and inter-rater reliability), valid (construct validity), and responsive to change.(10) More precisely, the intraclass correlation coefficients were 0.88 (95% confidence interval (CI) 0.82 to 0.92) for test re-test reliability, and 0.76 (95% CI 0.71 to 0.80) for inter-rater reliability between children and their parents. The mean difference in SSPedi scores between groups that were hypothesized to be more and less symptomatic was 7.8 (95% CI 6.4 to 9.2;  $P < 0.001$ ).(10) Construct validity was

1  
2  
3 demonstrated as all hypothesized relationships among measures were observed. SSPedi was  
4 responsive to change; those who reported they were much better or worse on a global symptom  
5 change scale had significantly changed from their baseline score (mean absolute difference 5.6,  
6 95% CI 3.8 to 7.5;  $P < 0.001$ ).  
7  
8  
9

10  
11 Translation into other languages will be an important component of SSPedi adoption within  
12 and outside of North America. We initially chose to focus translation on Spanish as it is a  
13 common first language of children in the United States.<sup>(11)</sup> The process of translation to  
14 Spanish must consider both cultural and linguistic perspectives.<sup>(12)</sup> Consequently, objectives  
15 were to translate SSPedi into Spanish and to evaluate the understandability and cultural  
16 relevance of the translated version of SSPedi among children with cancer and pediatric  
17 hematopoietic stem cell transplant (HSCT) recipients.  
18  
19  
20  
21  
22  
23  
24  
25  
26  
27

## 28 **METHODS**

29  
30 To translate SSPedi into Spanish, we conducted a multi-phase, descriptive study that was  
31 approved by The Hospital for Sick Children's Research Ethics Board (#1000057560) and the  
32 Research Ethics Boards of all participating sites. Written informed consent and verbal assent  
33 were obtained from all study participants or guardians (in the case of children providing assent).  
34 Both Spanish and English consent/assent forms were available. The following reflect the  
35 specific steps taken for translation of SSPedi into Spanish. The target countries were the United  
36 States, Canada and Argentina. We first determined whether one Spanish version would be  
37 appropriate for North America and Argentina by identification of a single translation that would  
38 be acceptable and understood in both regions. Next, we conducted translation followed by  
39 cognitive interviews as further described below.  
40  
41  
42  
43  
44  
45  
46  
47  
48  
49  
50

51 With Spanish-speaking investigators and translators from the United States, Canada and  
52 Argentina, we identified that at least two versions of Spanish would be required, namely one  
53 appropriate for North America and one appropriate for Argentina. More specifically, the local  
54  
55  
56  
57  
58  
59  
60

1  
2  
3 investigators and translators determined that for some symptoms, language that would be  
4 commonly used and well understood in one region would not be commonly used or well  
5 understood in the other region. In addition, they identified regional differences in terms of  
6 grammatical structure and the use of voseo conjugation. Voseo is the use of *vos* as a second-  
7 person singular pronoun, instead of, or alongside *tu*. In some countries such as Argentina, *vos*  
8 is the written and spoken standard. It can also be found in more casual speech in many other  
9 parts of Central and South America. Only the North American version is presented in this  
10 manuscript; the Argentinian version will be reported separately. Thus, enrollment sites for this  
11 report were The Hospital for Sick Children, Toronto, Canada and University of Texas Health  
12 Sciences Center San Antonio, San Antonio, United States.  
13  
14  
15  
16  
17  
18  
19  
20  
21  
22  
23  
24  
25  
26

## 27 Translation

28 Translation of SSPedi included four distinct steps, namely forward translation,  
29 reconciliation, back translation and back translation review. We followed the guiding principles  
30 for the translation and cultural adaptation process for patient-reported outcomes from the  
31 ISPOR Task Force.(13) The generic methods that will be used for SSPedi translations are  
32 provided as Appendix 1.  
33  
34  
35  
36  
37  
38

39 Forward translation involved the independent translation of SSPedi from English (source  
40 language) by two professional medical translators, at least one of whom resided in the country  
41 targeted for translation. Reconciliation between the translated versions of SSPedi occurred via a  
42 translation panel, which consisted of investigators from the enrollment sites, both translators  
43 and the Toronto-based team. The Toronto-based research team included one pediatric  
44 oncologist, one pediatric pharmacist, one clinical research manager and one clinical research  
45 project assistant.  
46  
47  
48  
49  
50  
51  
52  
53  
54  
55  
56  
57  
58  
59  
60

1  
2  
3 Next, the product of reconciliation was back translated to English by a third translator who  
4 did not have knowledge of English SSPedi and who was a native English speaker. The  
5 translation panel then reviewed the back translation against the source instrument to identify  
6 any discrepancies in meaning.  
7  
8  
9  
10

11 In addition to translating SSPedi itself, the professional medical translators also translated  
12 the synonym list. The synonym list was created for the English version of SSPedi to facilitate  
13 child self-report. It provides alternative words for each SSPedi symptom and was derived  
14 primarily through cognitive interviews with children themselves. Examples of synonyms for “te  
15 sientes decepcionado” (you feel disappointed) included “te sientes desilusionado” (you feel  
16 disillusioned) and “desencantado” (disenchanted).  
17  
18  
19  
20  
21  
22  
23  
24  
25

## 26 **Cognitive Interviewing**

27  
28 *Overview:* The interviews were audio-recorded and sent to Toronto for evaluation and  
29 adjudication. The goals were to determine whether children found the Spanish translated  
30 version of SSPedi difficult to understand, whether they incorrectly understood it, and whether  
31 there were cultural issues with the instrument. Interviews were conducted by trained research  
32 associates or nurses with experience in cognitive interviewing who are fluent in Spanish and  
33 English.  
34  
35  
36  
37  
38  
39  
40  
41  
42

43 *Eligibility Criteria:* Children were eligible to participate if they were 8 to 18 years of age; they had  
44 a diagnosis of cancer or were HSCT recipients; and Spanish was their first language  
45 (permissible for both English and Spanish to be their first language). We excluded participants  
46 who had visual or cognitive impairments that precluded completion of SSPedi according to their  
47 healthcare provider.  
48  
49  
50  
51  
52  
53  
54  
55  
56  
57  
58  
59  
60



1  
2  
3 *Primary and Secondary Outcome Measures:* Primary outcome was child self-reported difficulty  
4 with understanding of the entire instrument and each symptom using a 5-point Likert scale.  
5  
6  
7 Secondary outcomes were incorrect understanding of SSPedi items identified by cognitive  
8 interviews with the children using a 4-point Likert scale and cultural relevance, which was  
9 assessed qualitatively.  
10  
11  
12

13  
14  
15  
16 *Procedures:* Sampling was purposive to ensure that children of varying age, underlying  
17 diagnosis and gender were included. Potential participants were identified on the inpatient ward  
18 or outpatient clinic by the healthcare team. Upon confirmation of eligibility, the patient or family  
19 was approached to request participation in this study.  
20  
21  
22

23  
24 First, the respondent completed the translated version of SSPedi on paper in the presence  
25 of the interviewer. SSPedi could be read aloud if the child was having difficulty with reading. We  
26 evaluated four aspects, namely ease or difficulty with understanding as reported by the child,  
27 correct or incorrect understanding as evaluated by two raters, cultural relevance and missing  
28 items. Child respondents rated how easy or hard the translated version of SSPedi was to  
29 understand using a 5-point Likert scale ranging from 1="very hard" to 5="very easy". The  
30 instrument overall, each of the 15 items and the response scale were evaluated. We reported  
31 the number of children who found SSPedi hard or very hard to understand (score of 1 or 2). We  
32 also evaluated the child's understanding of each item and the response scale using cognitive  
33 probing. Both the interviewer and an independent rater in Toronto who listened to the audio-  
34 recording adjudicated understanding using a 4-point Likert scale ranging from 1="completely  
35 incorrect" to 4="completely correct". Discrepancies were resolved by consensus. We described  
36 the number of items that were rated as partially or completely incorrect (score of 1 or 2). Next,  
37 we asked children whether any questions within SSPedi did not make sense to them in thinking  
38 about their day-to-day life in order to assess cultural relevance. These data were evaluated by  
39 the Toronto rater and dichotomized into issues with cultural relevance identified vs. not  
40  
41  
42  
43  
44  
45  
46  
47  
48  
49  
50  
51  
52  
53  
54  
55  
56  
57  
58  
59  
60

1  
2  
3 identified. Finally, we asked whether any important symptoms were missing from Spanish  
4 SSPedi. Children could have responded to questions in English or Spanish according to their  
5 preference.  
6  
7  
8  
9

10  
11 *Evaluation of Responses and Sample Size Justification:* After each group of five children were  
12 interviewed, the study team met to review the responses to identify whether the translated  
13 version of SSPedi should be modified. Modification could be made to the script, the instrument  
14 itself or a synonym list of terms available for each SSPedi item. Formal evaluation of difficulty  
15 with understanding and incorrect understanding was performed after each group of 10 children  
16 were interviewed (considered one iteration).  
17  
18  
19  
20  
21  
22  
23

24 Criteria to consider Spanish SSPedi satisfactory were as follows: no more than one of the  
25 last 10 participants found the entire instrument and each item hard to understand, no more than  
26 one of the last 10 participants were incorrect in their understanding of each item as adjudicated  
27 by the raters, and other comments including those pertaining to cultural relevance did not  
28 suggest that modification was required. Sample size was based upon the suggestion that seven  
29 to 10 interviews are sufficient to determine understandability of an item.<sup>(14)</sup> We therefore  
30 intended to enroll up to 10-30 children to allow for up to three iterations consisting of 10 children  
31 each. All analyses were descriptive.  
32  
33  
34  
35  
36  
37  
38  
39  
40  
41  
42

### 43 **Finalization**

44  
45 The final version of Spanish SSPedi was reviewed by all members of the translation panel  
46 to ensure cohesiveness and freedom from minor error. The final version was then formatted.  
47  
48  
49  
50

### 51 **Patient and Public Involvement**

52  
53 No patients were involved in study design or conduct apart from being participants in the  
54 research.  
55  
56  
57  
58  
59  
60

## RESULTS

Between January 2018 and April 2019, we identified 38 children and enrolled 20 participants (Figure 1). Table 1 shows the demographics of the included participants. The number of children who were 8-10, 11-14 and 15-18 years of age were 4 (20%), 7 (35%) and 9 (45%) respectively. The most common types of Spanish spoken were Mexican (13, 65%) followed by Central American (2, 10%), South American (2, 10%) and other (3, 15%). After enrollment of 20 children, the North American Spanish SSPedi was considered satisfactory

**Table 1: Demographic Characteristics of Participants Evaluating North American Spanish SSPedi**

|                              | Cohort 1<br>(n=10) | Cohort 2<br>(n=10) |
|------------------------------|--------------------|--------------------|
| Sex                          |                    |                    |
| Male                         | 6 (60%)            | 6 (60%)            |
| Female                       | 4 (40%)            | 4 (40%)            |
| Age in Years                 |                    |                    |
| 8-10                         | 1 (10%)            | 3 (30%)            |
| 11-14                        | 4 (40%)            | 3 (30%)            |
| 15-18                        | 5 (50%)            | 4 (40%)            |
| Diagnosis                    |                    |                    |
| Leukemia/lymphoma            | 9 (90%)            | 4 (40%)            |
| Solid tumor                  | 1 (10%)            | 3 (30%)            |
| Brain tumor                  | 0                  | 2 (20%)            |
| Other*                       | 0                  | 1 (10%)            |
| Metastatic Disease           | 0                  | 0                  |
| Relapse                      | 1 (10%)            | 1 (10%)            |
| Stem Cell Transplantation    | 1 (10%)            | 1 (10%)            |
| Active Treatment             | 7 (70%)            | 4 (40%)            |
| Born in Country of Interview | 6 (60%)            | 9 (90%)            |
| Type of Spanish Spoken       |                    |                    |
| Mexican                      | 5 (50%)            | 8 (80%)            |
| Central American             | 2 (20%)            | 0                  |
| South American               | 1 (10%)            | 1 (10%)            |
| Other                        | 2 (20%)            | 1 (10%)            |
| Inpatient at Interview       | 0                  | 1 (10%)            |
| Attending School             | 5 (50%)            | 9 (90%)            |

Abbreviation: SSPedi – Symptom Screening in Pediatrics Tool

\*Other - primary immunodeficiency (n=1)

1  
2  
3 None of the child respondents reported that it was hard or very hard to complete Spanish  
4 SSPedi overall. Table 2 shows self-reported difficulty with understanding and adjudicated  
5 incorrect understanding of SSPedi items. It shows that after enrolling the first 10 participants,  
6 two participants found two items (mouth sores and tingly or numb hands or feet) hard to  
7 understand and therefore, criteria were not met to consider that version satisfactory. Changes  
8 made were additions to the synonym list only, based on alternative words given by children  
9 during the interview process. No changes to the instrument itself were required. In the last 10  
10 enrolled participants, at most one participant found each item hard to understand and none  
11 were incorrect in their understanding of each item. None of the respondents were incorrect in  
12 their understanding of the response scale. In terms of cultural relevance, no issues were  
13 identified by any of the 20 respondents. None of the children interviewed indicated that there  
14 were additional symptoms they felt were missing from the tool.  
15  
16  
17  
18  
19  
20  
21  
22  
23  
24  
25  
26  
27  
28  
29  
30  
31  
32  
33  
34  
35  
36  
37  
38  
39  
40  
41  
42  
43  
44  
45  
46  
47  
48  
49  
50  
51  
52  
53  
54  
55  
56  
57  
58  
59  
60

**Table 2: Self-reported Difficulty with Understanding and Rater-Adjudicated Incorrectness with North American Spanish SSPedi\***

|                                 | Cohort 1<br>(n=10) |           | Cohort 2<br>(n=10) |           |
|---------------------------------|--------------------|-----------|--------------------|-----------|
|                                 | Hard to Understand | Incorrect | Hard to Understand | Incorrect |
| Disappointed or Sad             | 0                  | 0         | 0                  | 0         |
| Scared or Worried               | 0                  | 0         | 0                  | 0         |
| Cranky or Angry                 | 1                  | 0         | 1                  | 0         |
| Difficulty Thinking/Remembering | 0                  | 0         | 1                  | 0         |
| Changes in your face/body       | 0                  | 0         | 1                  | 0         |
| Tired                           | 0                  | 0         | 0                  | 0         |
| Mouth sores                     | 2                  | 1         | 1                  | 0         |
| Headache                        | 0                  | 0         | 0                  | 0         |
| Hurt or Pain                    | 0                  | 1         | 0                  | 0         |
| Tingly or numb hands or feet    | 2                  | 0         | 1                  | 0         |
| Throwing Up                     | 0                  | 0         | 0                  | 0         |
| More or less hungry             | 0                  | 0         | 0                  | 0         |
| Changes in Taste                | 0                  | 0         | 1                  | 0         |
| Constipation                    | 0                  | 0         | 1                  | 0         |
| Diarrhea                        | 0                  | 0         | 0                  | 0         |

\* Hard = rated as hard or very hard to understand by participant  
Incorrect = rated as partially or completely incorrect by rater

Thus, after 20 participants, the North American Spanish version of SSPedi was considered satisfactory and appropriate for utilization. Figure 2 shows the final version.

## DISCUSSION

We translated a self-report symptom screening tool for pediatric patients with cancer and HSCT recipients named SSPedi into Spanish appropriate for use in North America. The final version was acceptable based upon self-reported difficulty with understanding, adjudicated incorrect understanding of different aspects of SSPedi and cultural relevance. Many patient-reported outcomes incorporated into oncology clinical trials are only validated in English,<sup>(15)</sup> leading to potential disparities in clinical trial participation. Consequently, translation into non-English languages should be a priority.

1  
2  
3 We found that at least two versions of Spanish SSPedi will be needed since Argentinian  
4 Spanish was considered sufficiently different from North American Spanish to require a distinct  
5 version. Interestingly, different quality of life instruments have taken alternate approaches to  
6 Spanish translation. For example, the developers of the PedsQL modules have chosen to  
7 translate Spanish for several different countries including the United States, Argentina,  
8 Columbia and Spain.(16) In contrast, the Patient-Reported Outcome Measurement Information  
9 System has a single Spanish translation version.(17) It is possible that the Argentinian version  
10 would be appropriate for other countries where voseo conjugation is prominent, such as several  
11 countries in Central America. However, we cannot be sure without explicit evaluation of the  
12 Argentinian version in those countries.

13  
14 We termed this version of Spanish SSPedi “North American” even though we did not  
15 include a site in Mexico. However, we noted that the majority of children self-identified their  
16 Spanish type as Mexican, thus providing reassurance that this version should be appropriate in  
17 that country. Ideally, further testing in Mexico would be conducted to confirm understandability  
18 and cultural relevance in that setting. Some could argue that North American Spanish is not a  
19 distinct form of Spanish as it reflects the Spanish spoken in several different originating  
20 countries. However, a study conducted in the United States or Canada is unlikely to use multiple  
21 versions of Spanish. Thus, creating a North America Spanish version addresses a practical  
22 clinical and research need in these geographic locations.

23  
24 During the creation of English SSPedi, we found four items more difficult to understand by  
25 children 8-18 years of age, namely ‘changes in how your body and face look’, ‘tingly or numb  
26 hands or feet’, ‘feeling more or less hungry than you usually do’, and ‘constipation (hard to  
27 poop).(18) Interestingly, three of these four items were similarly hard to understand by at least  
28 one participant in this current study focused on Spanish translation. This may suggest that  
29 difficulty with understanding was not related to Spanish translation but rather, that these are  
30 more difficult concepts for children in general to understand, particularly if respondents had no  
31

1  
2  
3 previous experience with the symptom. This hypothesis is supported by the absence or limited  
4 number of self-reported instruments for at least peripheral neuropathy among pediatric cancer  
5 patients.(19)  
6  
7  
8

9 The main implication of this work is that there is now a symptom assessment tool that can  
10 be used among North American Spanish speaking children receiving cancer treatments. Given  
11 known disparities based upon race, ethnicity and language,(20, 21) development of such a tool  
12 may be an important step toward reducing disparities in terms of both clinical trial enrollment  
13 and routine clinical care. Future efforts could evaluate barriers to utilization of the translated tool  
14 as well as translating SSPedi to other Spanish-speaking populations.  
15  
16  
17  
18  
19  
20  
21

22 The strengths of this study were conduct of the translation according to internationally  
23 recognized standards(13) and evaluation in two countries. Other strengths include its multi-  
24 center conduct to improve generalizability, multiple approaches to assessing understandability  
25 to improve validity and use of external adjudicators to improve reliability. However, weaknesses  
26 included enrollment of a limited number of children and in only two centers. Evaluation in other  
27 locations and with additional children may influence the synonym list further although based  
28 upon the initial results, it is less likely that changes to the instrument itself will be required. In  
29 addition, throughout the SSPedi program, ease or difficulty in understanding has focused on the  
30 number of children describing an item as hard or very hard to understand. Focusing on those  
31 who find an item neither easy nor hard to understand could lead to different results.  
32  
33  
34  
35  
36  
37  
38  
39  
40  
41  
42

43 In summary, we translated and finalized Spanish SSPedi appropriate for use in North  
44 America based upon self-reported difficulty with understanding, adjudicated incorrect  
45 understanding of different aspects of SSPedi and cultural relevance. This work is important as  
46 translation of patient-reported outcomes to non-English languages may reduce disparities in  
47 clinical trial enrollment and cancer care delivery. Future research will translate and evaluate  
48 SSPedi for use in Argentina and other Spanish-speaking countries.  
49  
50  
51  
52  
53  
54  
55  
56  
57  
58  
59  
60

## ACKNOWLEDGMENTS

We thank all the translators who worked with us on this project and whose expertise and insights greatly assisted the translation and evaluation process.

## AUTHOR CONTRIBUTORSHIP

LD and LS developed the study concept and design. EP, DN, CS, SG, GG, and GD were involved in data collection. LS drafted the manuscript. All authors EP, AG, AS, AML, DN, CS, SG, GG, GD, LD, and LS participated in data interpretation, reviewed, revised, and approved the manuscript.

## COMPETING INTERESTS

The authors declare that they have no competing interests.

## FUNDING

This research received no specific grant from any funding agency in the public, commercial or not-for-profit sectors. LS is supported by a Canada Research Chair in Pediatric Oncology Supportive Care.

## DATA SHARING

The datasets used or analyzed during the current study are available from the corresponding author on reasonable request.

## FIGURE LEGEND

Figure 1: North American Spanish SSPedi Participant Flow Diagram

Figure 2: North American Spanish SSPedi



## REFERENCES

1. Baggott C, Dodd M, Kennedy C, et al. Changes in children's reports of symptom occurrence and severity during a course of myelosuppressive chemotherapy. *J Pediatr Oncol Nurs*. 2010;27(6):307-15. doi:10.1177/1043454210377619
2. Miller E, Jacob E, Hockenberry MJ. Nausea, pain, fatigue, and multiple symptoms in hospitalized children with cancer. *Oncol Nurs Forum*. 2011;38(5):E382-93. doi:10.1188/11.ONF.E382-E393
3. Poder U, Ljungman G, von Essen L. Parents' perceptions of their children's cancer-related symptoms during treatment: a prospective, longitudinal study. *J Pain Symptom Manage*. 2010;40(5):661-70. doi:10.1016/j.jpainsymman.2010.02.012
4. Loves R, Plenert E, Tomlinson V, et al. Changes in hunger among pediatric patients with cancer and hematopoietic stem cell transplantation recipients. *Support Care Cancer*. 2020. doi:10.1007/s00520-020-05425-w
5. Loves R, Plenert E, Tomlinson V, et al. Changes in taste among pediatric patients with cancer and hematopoietic stem cell transplantation recipients. *Qual Life Res*. 2019;28(11):2941-9. doi:10.1007/s11136-019-02242-5
6. Loves R, Tomlinson D, Baggott C, et al. Taste changes in children with cancer and hematopoietic stem cell transplant recipients. *Support Care Cancer*. 2019;27(6):2247-54. doi:10.1007/s00520-018-4509-2
7. Johnston DL, Hyslop S, Tomlinson D, et al. Describing symptoms using the Symptom Screening in Pediatrics Tool in hospitalized children with cancer and hematopoietic stem cell transplant recipients. *Cancer Med*. 2018;7(5):1750-5. doi:10.1002/cam4.1433
8. Dupuis LL, Johnston DL, Baggott C, et al. Validation of the Symptom Screening in Pediatrics Tool in Children Receiving Cancer Treatments. *J Natl Cancer Inst*. 2018;110(6):661-8. doi:10.1093/jnci/djx250
9. Dupuis LL, Ethier MC, Tomlinson D, et al. A systematic review of symptom assessment scales in children with cancer. *BMC Cancer*. 2012;12:430. doi:10.1186/1471-2407-12-430
10. Tomlinson D, Dupuis LL, Gibson P, et al. Initial development of the Symptom Screening in Pediatrics Tool (SSPedi). *Support Care Cancer*. 2014;22(1):71-5. doi:10.1007/s00520-013-1945-x
11. Gonzalez-Barrera A, Lopez M. Spanish is the most spoken non-English language in U.S. homes, even among non-Hispanics Washington, D.C.: Pew Research Center; 2013 [updated 20Jan2020]. [Available from: <https://www.pewresearch.org/fact-tank/2013/08/13/spanish-is-the-most-spoken-non-english-language-in-u-s-homes-even-among-non-hispanics/>.]
12. Yang L. Treatment of cultural differences in translation. *Studies in Literature and Language*. 2014;8(1):39-42. doi:10.3968/j.sll.1923156320140801.2941
13. Wild D, Grove A, Martin M, et al. Principles of Good Practice for the Translation and Cultural Adaptation Process for Patient-Reported Outcomes (PRO) Measures: report of the ISPOR Task Force for Translation and Cultural Adaptation. *Value Health*. 2005;8(2):94-104. doi:10.1111/j.1524-4733.2005.04054.x
14. Willis G, editor. *Cognitive Interviewing: A Tool for Improving Questionnaire Design*: Sage Publications; 2009.
15. Grant SR, Noticewala SS, Mainwaring W, et al. Non-English language validation of patient-reported outcome measures in cancer clinical trials. *Support Care Cancer*. 2020;28(6):2503-5. doi:10.1007/s00520-020-05399-9
16. Varni JW. PedsQL Translations 2019 [updated 20Jan2020]. [Available from: <https://www.pedsql.org/translations.html>.]

- 1  
2  
3 17. HealthMeasures. Available Translations 2019 [updated 20Jan2020]. [Available from:  
4 [http://www.healthmeasures.net/explore-measurement-systems/promis/intro-to-promis/available-](http://www.healthmeasures.net/explore-measurement-systems/promis/intro-to-promis/available-translations/117-available-translations.)  
5 [translations/117-available-translations.](http://www.healthmeasures.net/explore-measurement-systems/promis/intro-to-promis/available-translations/117-available-translations.)]  
6  
7 18. O'Sullivan C, Lee Dupuis L, Gibson P, et al. Evaluation of the electronic self-report  
8 Symptom Screening in Pediatrics Tool (SSPedi). *BMJ Support Palliat Care*. 2018;8(1):110-6.  
9 doi:10.1136/bmjspcare-2015-001084  
10  
11 19. Johnston DL, Sung L, Stark D, et al. A systematic review of patient-reported outcome  
12 measures of neuropathy in children, adolescents and young adults. *Support Care Cancer*.  
13 2016;24(9):3723-8. doi:10.1007/s00520-016-3199-x  
14  
15 20. Bhatia S. Disparities in cancer outcomes: lessons learned from children with cancer.  
16 *Pediatr Blood Cancer*. 2011;56(6):994-1002. doi:10.1002/pbc.23078  
17  
18 21. Vega WA, Rodriguez MA, Gruskin E. Health disparities in the Latino population.  
19 *Epidemiol Rev*. 2009;31:99-112. doi:10.1093/epirev/mxp008  
20  
21  
22  
23  
24  
25  
26  
27  
28  
29  
30  
31  
32  
33  
34  
35  
36  
37  
38  
39  
40  
41  
42  
43  
44  
45  
46  
47  
48  
49  
50  
51  
52  
53  
54  
55  
56  
57  
58  
59  
60

**Figure 1: North American Spanish SSPedi Participant Flow Diagram**



For peer review only

Figure 2: North American Spanish SSPedi

## Spanish SSPedi (North America): detección de síntomas en pediatría

Marca el círculo que mejor describe cuánto te **molestó** cada una de estas cosas **ayer u hoy**:

|                                                            | No me molestó para nada | Un poco               | Más o menos           | Mucho                 | Me molestó muchísimo  |
|------------------------------------------------------------|-------------------------|-----------------------|-----------------------|-----------------------|-----------------------|
| Te sientes decepcionado o triste                           | <input type="radio"/>   | <input type="radio"/> | <input type="radio"/> | <input type="radio"/> | <input type="radio"/> |
| Te sientes asustado o preocupado                           | <input type="radio"/>   | <input type="radio"/> | <input type="radio"/> | <input type="radio"/> | <input type="radio"/> |
| Estas de mal humor o enojado                               | <input type="radio"/>   | <input type="radio"/> | <input type="radio"/> | <input type="radio"/> | <input type="radio"/> |
| Te cuesta pensar o recordar cosas                          | <input type="radio"/>   | <input type="radio"/> | <input type="radio"/> | <input type="radio"/> | <input type="radio"/> |
| Notas algún cambio en el cuerpo o la cara                  | <input type="radio"/>   | <input type="radio"/> | <input type="radio"/> | <input type="radio"/> | <input type="radio"/> |
| Te sientes cansado                                         | <input type="radio"/>   | <input type="radio"/> | <input type="radio"/> | <input type="radio"/> | <input type="radio"/> |
| Tienes llagas en la boca                                   | <input type="radio"/>   | <input type="radio"/> | <input type="radio"/> | <input type="radio"/> | <input type="radio"/> |
| Tienes dolor de cabeza                                     | <input type="radio"/>   | <input type="radio"/> | <input type="radio"/> | <input type="radio"/> | <input type="radio"/> |
| Sientes malestar o dolor (que no sea dolor de cabeza)      | <input type="radio"/>   | <input type="radio"/> | <input type="radio"/> | <input type="radio"/> | <input type="radio"/> |
| Sientes hormigueo o entumecimiento en las manos o los pies | <input type="radio"/>   | <input type="radio"/> | <input type="radio"/> | <input type="radio"/> | <input type="radio"/> |
| Tienes vómitos o ganas de vomitar                          | <input type="radio"/>   | <input type="radio"/> | <input type="radio"/> | <input type="radio"/> | <input type="radio"/> |
| Tienes más o menos hambre que de costumbre                 | <input type="radio"/>   | <input type="radio"/> | <input type="radio"/> | <input type="radio"/> | <input type="radio"/> |
| Notas cambios en el gusto                                  | <input type="radio"/>   | <input type="radio"/> | <input type="radio"/> | <input type="radio"/> | <input type="radio"/> |
| Tienes estreñimiento (dificultad para hacer popó)          | <input type="radio"/>   | <input type="radio"/> | <input type="radio"/> | <input type="radio"/> | <input type="radio"/> |
| Tienes diarrea (popó aguada)                               | <input type="radio"/>   | <input type="radio"/> | <input type="radio"/> | <input type="radio"/> | <input type="radio"/> |

Cuéntanos cualquier otra cosa que te haya molestado recientemente y escríbelo aquí.

Fecha de la versión: 27 febrero 2018

## Appendix 1: Guidelines for Conducting Translation of SSPedi

| Step | Description                            | Details                                                                                                                                                                                                                                                                                                                                                                                                                                                                                                                                  |
|------|----------------------------------------|------------------------------------------------------------------------------------------------------------------------------------------------------------------------------------------------------------------------------------------------------------------------------------------------------------------------------------------------------------------------------------------------------------------------------------------------------------------------------------------------------------------------------------------|
| 1    | Forward translation                    | Two native speakers of the target language independently produce a forward translation of SSPedi from English into the target language. Both must be professional medical translators and at least one must reside in the country targeted for translation.                                                                                                                                                                                                                                                                              |
| 2    | Reconciliation of forward translations | Translation panel consists of the two forward translators and investigators from enrollment sites where translation will be tested. Discrepancies between translators identified and resolved by consensus. Goal is to produce a single translated version of the tool.                                                                                                                                                                                                                                                                  |
| 3    | Back translation                       | Forward translation is back translated into English by an independent translator. Back translator must be a native English speaker with no knowledge of English SSPedi.                                                                                                                                                                                                                                                                                                                                                                  |
| 4    | Back translation review                | Comparison of back translated version of SSPedi with original SSPedi tool by the research team to detect mistranslations or inaccuracies. Goal is to produce a final translated version of the tool ready for testing.                                                                                                                                                                                                                                                                                                                   |
| 5    | Cognitive interviewing                 | Goals are to determine if<br>a) SSPedi items and response scale are: <ul style="list-style-type: none"> <li>• Easy to understand as rated by children</li> <li>• Correctly interpreted as rated by the interviewer and a second adjudicator</li> </ul> b) there are any issues with cultural relevancy<br>A minimum of <b>10</b> children from target population must be enrolled.                                                                                                                                                       |
| 6    | Review interview findings              | Interview findings are summarized by iterations of 10 children. Translation panel decides whether revisions required or whether translated version is satisfactory. In general, criteria to consider the translation satisfactory are:<br>a) No more than one participants in the last 10 finds an item hard or very hard to understand<br>b) No more than one participant in the last 10 is incorrect in their understanding of an item<br>c) Comments do not indicate other modification or additions to the synonym list are required |
| 7    | <i>Further cognitive interviewing</i>  | <i>If any changes were made, additional cognitive interviews conducted in iterations of 10 children until the translated version is considered satisfactory</i>                                                                                                                                                                                                                                                                                                                                                                          |
| 8    | Finalization                           | The final translated version of SSPedi reviewed by the translation panel to ensure cohesiveness and freedom from minor error.                                                                                                                                                                                                                                                                                                                                                                                                            |

# BMJ Open

## Translating the Symptom Screening in Pediatrics Tool (SSPedi) into North American Spanish and Among Spanish-speaking Children Receiving Cancer Treatments, Evaluating Understandability and Cultural Relevance in a Multiple-Phase Descriptive Study

|                                 |                                                                                                                                                                                                                                                                                                                                                                                                                                                                                                                                                                                                                                                                                                                                                                                                                                                                                                                                                                                                                                                                                                                                                    |
|---------------------------------|----------------------------------------------------------------------------------------------------------------------------------------------------------------------------------------------------------------------------------------------------------------------------------------------------------------------------------------------------------------------------------------------------------------------------------------------------------------------------------------------------------------------------------------------------------------------------------------------------------------------------------------------------------------------------------------------------------------------------------------------------------------------------------------------------------------------------------------------------------------------------------------------------------------------------------------------------------------------------------------------------------------------------------------------------------------------------------------------------------------------------------------------------|
| Journal:                        | <i>BMJ Open</i>                                                                                                                                                                                                                                                                                                                                                                                                                                                                                                                                                                                                                                                                                                                                                                                                                                                                                                                                                                                                                                                                                                                                    |
| Manuscript ID                   | bmjopen-2020-037406.R4                                                                                                                                                                                                                                                                                                                                                                                                                                                                                                                                                                                                                                                                                                                                                                                                                                                                                                                                                                                                                                                                                                                             |
| Article Type:                   | Original research                                                                                                                                                                                                                                                                                                                                                                                                                                                                                                                                                                                                                                                                                                                                                                                                                                                                                                                                                                                                                                                                                                                                  |
| Date Submitted by the Author:   | 16-Oct-2020                                                                                                                                                                                                                                                                                                                                                                                                                                                                                                                                                                                                                                                                                                                                                                                                                                                                                                                                                                                                                                                                                                                                        |
| Complete List of Authors:       | Plenert, Erin; Hospital for Sick Children Research Institute, Child Health Evaluative Sciences<br>Grimes, Allison; University of Texas Health Science Center at San Antonio, Division of Hematology-Oncology<br>Sugalski, Aaron; University of Texas Health Science Center at San Antonio, Division of Hematology-Oncology<br>Langevin, Anne-Marie; University of Texas Health Science Center at San Antonio, Division of Hematology-Oncology<br>Nieto, Dominica; University of Texas Health Science Center at San Antonio, Division of Hematology-Oncology<br>Salaverria, Carmen; Hospital Nacional De Ninos Benjamin Bloom, Department of Oncology<br>Gomez, Sergio; Hospital de Niños Sor María Ludovica, Stem Cell Transplantation Unit<br>Gonzalez, Gisela; Hospital de Niños Sor María Ludovica, Stem Cell Transplantation Unit<br>D'Angelo, Gisela; Hospital de Niños Sor María Ludovica, Stem Cell Transplantation Unit<br>Dupuis, Lee; University of Toronto Leslie Dan Faculty of Pharmacy,<br>Sung, Lillian; Hospital for Sick Children, Division of Haematology/Oncology; Hospital for Sick Children SickKids Learning Institute, CHES |
| <b>Primary Subject Heading</b>: | Oncology                                                                                                                                                                                                                                                                                                                                                                                                                                                                                                                                                                                                                                                                                                                                                                                                                                                                                                                                                                                                                                                                                                                                           |
| Secondary Subject Heading:      | Paediatrics                                                                                                                                                                                                                                                                                                                                                                                                                                                                                                                                                                                                                                                                                                                                                                                                                                                                                                                                                                                                                                                                                                                                        |
| Keywords:                       | Paediatric oncology < ONCOLOGY, Bone marrow transplantation < HAEMATOLOGY, Paediatric oncology < PAEDIATRICES                                                                                                                                                                                                                                                                                                                                                                                                                                                                                                                                                                                                                                                                                                                                                                                                                                                                                                                                                                                                                                      |
|                                 |                                                                                                                                                                                                                                                                                                                                                                                                                                                                                                                                                                                                                                                                                                                                                                                                                                                                                                                                                                                                                                                                                                                                                    |

1  
2  
3  
4  
5  
6  
7  
8  
9  
10  
11  
12  
13  
14  
15  
16  
17  
18  
19  
20  
21  
22  
23  
24  
25  
26  
27  
28  
29  
30  
31  
32  
33  
34  
35  
36  
37  
38  
39  
40  
41  
42  
43  
44  
45  
46  
47  
48  
49  
50  
51  
52  
53  
54  
55  
56  
57  
58  
59  
60





I, the Submitting Author has the right to grant and does grant on behalf of all authors of the Work (as defined in the below author licence), an exclusive licence and/or a non-exclusive licence for contributions from authors who are: i) UK Crown employees; ii) where BMJ has agreed a CC-BY licence shall apply, and/or iii) in accordance with the terms applicable for US Federal Government officers or employees acting as part of their official duties; on a worldwide, perpetual, irrevocable, royalty-free basis to BMJ Publishing Group Ltd ("BMJ") its licensees and where the relevant Journal is co-owned by BMJ to the co-owners of the Journal, to publish the Work in this journal and any other BMJ products and to exploit all rights, as set out in our [licence](#).

The Submitting Author accepts and understands that any supply made under these terms is made by BMJ to the Submitting Author unless you are acting as an employee on behalf of your employer or a postgraduate student of an affiliated institution which is paying any applicable article publishing charge ("APC") for Open Access articles. Where the Submitting Author wishes to make the Work available on an Open Access basis (and intends to pay the relevant APC), the terms of reuse of such Open Access shall be governed by a Creative Commons licence – details of these licences and which [Creative Commons](#) licence will apply to this Work are set out in our licence referred to above.

Other than as permitted in any relevant BMJ Author's Self Archiving Policies, I confirm this Work has not been accepted for publication elsewhere, is not being considered for publication elsewhere and does not duplicate material already published. I confirm all authors consent to publication of this Work and authorise the granting of this licence.



1  
2  
3 TITLE: Translating the Symptom Screening in Pediatrics Tool (SSPedi) into North American  
4 Spanish and Among Spanish-speaking Children Receiving Cancer Treatments, Evaluating  
5 Understandability and Cultural Relevance in a Multiple-Phase Descriptive Study  
6  
7  
8  
9

10  
11 AUTHORS: Erin Plenert BA, MPH<sup>1</sup>; Allison Grimes MD, MSCI<sup>2</sup>; Aaron Sugalski DO<sup>2</sup>; Anne-  
12 Marie Langevin MD<sup>2</sup>; Dominica Nieto BA<sup>2</sup>; Carmen Salaverria MSc<sup>3</sup>; Sergio Gomez MD<sup>4</sup>; Gisela  
13 Gonzalez<sup>4</sup>; Gisela D'Angelo<sup>4</sup>; L. Lee Dupuis RPh, PhD<sup>1,5</sup>; Lillian Sung MD, PhD<sup>1,6</sup>  
14  
15  
16  
17  
18  
19

#### 20 AFFILIATIONS

21  
22 <sup>1</sup>Program in Child Health Evaluative Sciences, The Hospital for Sick Children, Peter Gilgan  
23 Centre for Research and Learning, 686 Bay Street, Toronto, Ontario, M5G 0A4, Canada  
24  
25

26 <sup>2</sup>Pediatric Hematology Oncology, University of Texas Health Science Center at San Antonio,  
27 7703 Floyd Curl Drive, San Antonio, TX, 78229, US  
28  
29

30 <sup>3</sup>Department of Oncology, Benjamin Bloom Children's Hospital, Bulevar De Los Heroes, San  
31 Salvador, El Salvador  
32  
33

34 <sup>4</sup>Stem Cell Transplantation Unit, Hospital de Niños Sor María Ludovica, Calle 14 1631, La Plata,  
35 Argentina  
36  
37

38 <sup>5</sup>Department of Pharmacy, The Hospital for Sick Children, 555 University Avenue, Toronto,  
39 Ontario, M5G 1X8, Canada  
40  
41  
42

43 <sup>6</sup>Division of Haematology/Oncology, The Hospital for Sick Children, 555 University Avenue,  
44 Toronto, Ontario, M5G 1X8, Canada  
45  
46  
47  
48  
49  
50  
51  
52  
53  
54  
55  
56  
57  
58  
59  
60

## CORRESPONDING AUTHOR:

Lillian Sung MD, PhD

Division of Haematology/Oncology

The Hospital for Sick Children

555 University Avenue

Toronto, Ontario

M5G 1X8

Telephone: 416-813-5287

Fax: 416-813-5979

Email: [lillian.sung@sickkids.ca](mailto:lillian.sung@sickkids.ca)

KEY WORDS: SSPedi, symptoms, translation, Spanish

WORD COUNTS: Abstract 276; Text 3,086; Tables 2; Figures 2; Appendix 1

## ABSTRACT

**Objectives:** Symptom screening is important to achieving symptom control. Symptom Screening in Pediatrics Tool (SSPedi) is validated for English-speaking children. Objectives were to translate SSPedi into Spanish, and to evaluate the understandability and cultural relevance of the translated version among Spanish-speaking children with cancer and pediatric hematopoietic stem cell transplant recipients.

**Methods:** We conducted a multi-phase, descriptive study to translate SSPedi into Spanish. The first step was to determine whether one Spanish version would be appropriate for both North America and Argentina. Once this decision was made, forward and backward translations were performed. The translated version was evaluated by Spanish-speaking children 8-18 years of age receiving cancer treatments.

**Primary and Secondary Outcome Measures:** Primary outcome was child self-reported difficulty with understanding of the entire instrument and each symptom using a 5-point Likert scale. Secondary outcomes were incorrect understanding of SSPedi items identified by cognitive interviews with the children using a 4-point Likert scale and cultural relevance, which was assessed qualitatively.

**Results:** This report focuses on North American Spanish as a separate version will be required for Argentinian Spanish SSPedi based on different common vocabulary and grammatical structure. There were 20 children from Toronto and San Antonio included in cognitive interviews. The most common types of Spanish spoken were Mexican (13, 65%), Central American (2, 10%) and South American (2, 10%). No child reported that it was hard or very hard to complete Spanish SSPedi. Changes to the instrument itself were not required based upon understanding or cultural relevance.

**Conclusions:** We translated and finalized Spanish SSPedi appropriate for use in North America. Future research will translate and evaluate SSPedi for use in Argentina and other Spanish-speaking countries.

## STRENGTHS AND LIMITATIONS OF THIS STUDY

- Multi-center conduct is a strength as it improves generalizability of the study.
- Multiple approaches to assessing understandability is a strength as it improves robustness and validity of the findings.
- Use of external adjudicators is a strength as it improves reliability of the results.
- The study is limited by conduct in only two countries; this version of SSPedi may not be well-understood in other Spanish-speaking countries.

## BACKGROUND

Pediatric cancer patients experience prevalent and severely bothersome symptoms during treatment.(1-3) Common symptoms experienced include pain, nausea and fatigue.(1) More recent studies have also highlighted the prevalence of changes in hunger and taste as bothersome symptoms in this population.(4-7) Symptoms are important because there is strong correlation between increasing symptom burden and worse quality of life.(8) Active symptom screening and reporting are likely to be central in optimizing symptom control. Active symptom screening may identify symptoms early, improve communication of the extent of bother to the healthcare team and increase earlier and more consistent management strategies.

In prior research, we identified the lack of appropriate symptom screening measures for children with cancer based upon length, content validity or appropriateness(9) and consequently, developed a new instrument named the Symptom Screening in Pediatrics Tool (SSPedi).(10) SSPedi asks about the degree to which 15 symptoms bothered the child yesterday or today on a 5-point Likert scale. These symptoms are disappointed or sad, scared or worried, cranky or angry, problems thinking, body or face changes, tiredness, mouth sores, headache, other pain, tingling or numbness, throwing up, hunger changes, taste changes, constipation and diarrhea.

To evaluate the psychometric properties of SSPedi, we conducted a multi-center study with 502 English-speaking children with sites in both Canada and the United States. All children enrolled in the study were between the ages of 8-18 and were receiving cancer therapies. SSPedi was found to be reliable (internal consistency and test re-test and inter-rater reliability), valid (construct validity), and responsive to change.(10) More precisely, the intraclass correlation coefficients were 0.88 (95% confidence interval (CI) 0.82 to 0.92) for test re-test reliability, and 0.76 (95% CI 0.71 to 0.80) for inter-rater reliability between children and their parents. The mean difference in SSPedi scores between groups that were hypothesized to be more and less symptomatic was 7.8 (95% CI 6.4 to 9.2;  $P < 0.001$ ).(10) Construct validity was

1  
2  
3 demonstrated as all hypothesized relationships among measures were observed. SSPedi was  
4 responsive to change; those who reported they were much better or worse on a global symptom  
5 change scale had significantly changed from their baseline score (mean absolute difference 5.6,  
6 95% CI 3.8 to 7.5;  $P < 0.001$ ).  
7  
8  
9

10  
11 Translation into other languages will be an important component of SSPedi adoption within  
12 and outside of North America. We initially chose to focus translation on Spanish as it is a  
13 common first language of children in the United States.<sup>(11)</sup> The process of translation to  
14 Spanish must consider both cultural and linguistic perspectives.<sup>(12)</sup> Consequently, objectives  
15 were to translate SSPedi into Spanish and to evaluate the understandability and cultural  
16 relevance of the translated version of SSPedi among children with cancer and pediatric  
17 hematopoietic stem cell transplant (HSCT) recipients.  
18  
19  
20  
21  
22  
23  
24  
25  
26  
27

## 28 **METHODS**

29  
30 To translate SSPedi into Spanish, we conducted a multi-phase, descriptive study that was  
31 approved by The Hospital for Sick Children's Research Ethics Board (#1000057560) and the  
32 Research Ethics Boards of all participating sites. Written informed consent and verbal assent  
33 were obtained from all study participants or guardians (in the case of children providing assent).  
34 Both Spanish and English consent/assent forms were available. The following reflect the  
35 specific steps taken for translation of SSPedi into Spanish. The target countries were the United  
36 States, Canada and Argentina. We first determined whether one Spanish version would be  
37 appropriate for North America and Argentina by identification of a single translation that would  
38 be acceptable and understood in both regions. Next, we conducted translation followed by  
39 cognitive interviews as further described below.  
40  
41  
42  
43  
44  
45  
46  
47  
48  
49  
50

51 With Spanish-speaking investigators and translators from the United States, Canada and  
52 Argentina, we identified that at least two versions of Spanish would be required, namely one  
53 appropriate for North America and one appropriate for Argentina. More specifically, the local  
54  
55  
56  
57  
58  
59  
60

1  
2  
3 investigators and translators determined that for some symptoms, language that would be  
4 commonly used and well understood in one region would not be commonly used or well  
5 understood in the other region. In addition, they identified regional differences in terms of  
6 grammatical structure and the use of voseo conjugation. Voseo is the use of *vos* as a second-  
7 person singular pronoun, instead of, or alongside *tu*. In some countries such as Argentina, *vos*  
8 is the written and spoken standard. It can also be found in more casual speech in many other  
9 parts of Central and South America. Only the North American version is presented in this  
10 manuscript; the Argentinian version will be reported separately. Thus, enrollment sites for this  
11 report were The Hospital for Sick Children, Toronto, Canada and University of Texas Health  
12 Sciences Center San Antonio, San Antonio, United States.  
13  
14  
15  
16  
17  
18  
19  
20  
21  
22  
23  
24  
25  
26

## 27 Translation

28 Translation of SSPedi included four distinct steps, namely forward translation,  
29 reconciliation, back translation and back translation review. We followed the guiding principles  
30 for the translation and cultural adaptation process for patient-reported outcomes from the  
31 ISPOR Task Force.(13) The generic methods that will be used for SSPedi translations are  
32 provided as Appendix 1.  
33  
34  
35  
36  
37  
38

39 Forward translation involved the independent translation of SSPedi from English (source  
40 language) by two professional medical translators, at least one of whom resided in the country  
41 targeted for translation. Reconciliation between the translated versions of SSPedi occurred via a  
42 translation panel, which consisted of investigators from the enrollment sites, both translators  
43 and the Toronto-based team. The Toronto-based research team included one pediatric  
44 oncologist, one pediatric pharmacist, one clinical research manager and one clinical research  
45 project assistant.  
46  
47  
48  
49  
50  
51  
52  
53  
54  
55  
56  
57  
58  
59  
60

1  
2  
3 Next, the product of reconciliation was back translated to English by a third translator who  
4 did not have knowledge of English SSPedi and who was a native English speaker. The  
5 translation panel then reviewed the back translation against the source instrument to identify  
6 any discrepancies in meaning.  
7  
8  
9  
10

11 In addition to translating SSPedi itself, the professional medical translators also translated  
12 the synonym list. The synonym list was created for the English version of SSPedi to facilitate  
13 child self-report. It provides alternative words for each SSPedi symptom and was derived  
14 primarily through cognitive interviews with children themselves. Examples of synonyms for “te  
15 sientes decepcionado” (you feel disappointed) included “te sientes desilusionado” (you feel  
16 disillusioned) and “desencantado” (disenchanted).  
17  
18  
19  
20  
21  
22  
23  
24  
25

## 26 **Cognitive Interviewing**

27  
28 *Overview:* The interviews were audio-recorded and sent to Toronto for evaluation and  
29 adjudication. The goals were to determine whether children found the Spanish translated  
30 version of SSPedi difficult to understand, whether they incorrectly understood it, and whether  
31 there were cultural issues with the instrument. Interviews were conducted by trained research  
32 associates or nurses with experience in cognitive interviewing who are fluent in Spanish and  
33 English.  
34  
35  
36  
37  
38  
39  
40  
41  
42

43 *Eligibility Criteria:* Children were eligible to participate if they were 8 to 18 years of age; they had  
44 a diagnosis of cancer or were HSCT recipients; and Spanish was their first language  
45 (permissible for both English and Spanish to be their first language). We excluded participants  
46 who had visual or cognitive impairments that precluded completion of SSPedi according to their  
47 healthcare provider.  
48  
49  
50  
51  
52  
53  
54  
55  
56  
57  
58  
59  
60



1  
2  
3 *Primary and Secondary Outcome Measures:* Primary outcome was child self-reported difficulty  
4 with understanding of the entire instrument and each symptom using a 5-point Likert scale.  
5  
6  
7 Secondary outcomes were incorrect understanding of SSPedi items identified by cognitive  
8 interviews with the children using a 4-point Likert scale and cultural relevance, which was  
9  
10 assessed qualitatively.  
11  
12  
13

14  
15  
16 *Procedures:* Sampling was purposive to ensure that children of varying age, underlying  
17 diagnosis and gender were included. Potential participants were identified on the inpatient ward  
18 or outpatient clinic by the healthcare team. Upon confirmation of eligibility, the patient or family  
19  
20 was approached to request participation in this study.  
21  
22  
23

24 First, the respondent completed the translated version of SSPedi on paper in the presence  
25 of the interviewer. SSPedi could be read aloud if the child was having difficulty with reading. We  
26 evaluated four aspects, namely ease or difficulty with understanding as reported by the child,  
27 correct or incorrect understanding as evaluated by two raters, cultural relevance and missing  
28 items. Child respondents rated how easy or hard the translated version of SSPedi was to  
29 understand using a 5-point Likert scale ranging from 1="very hard" to 5="very easy". The  
30 instrument overall, each of the 15 items and the response scale were evaluated. We reported  
31 the number of children who found SSPedi hard or very hard to understand (score of 1 or 2). We  
32 also evaluated the child's understanding of each item and the response scale using cognitive  
33 probing. Both the interviewer and an independent rater in Toronto who listened to the audio-  
34 recording adjudicated understanding using a 4-point Likert scale ranging from 1="completely  
35 incorrect" to 4="completely correct". Discrepancies were resolved by consensus. We described  
36 the number of items that were rated as partially or completely incorrect (score of 1 or 2). Next,  
37 we asked children whether any questions within SSPedi did not make sense to them in thinking  
38 about their day-to-day life in order to assess cultural relevance. These data were evaluated by  
39 the Toronto rater and dichotomized into issues with cultural relevance identified vs. not  
40  
41  
42  
43  
44  
45  
46  
47  
48  
49  
50  
51  
52  
53  
54  
55  
56  
57  
58  
59  
60

1  
2  
3 identified. Finally, we asked whether any important symptoms were missing from Spanish  
4 SSPedi. Children could have responded to questions in English or Spanish according to their  
5 preference.  
6  
7  
8  
9

10  
11 *Evaluation of Responses and Sample Size Justification:* After each group of five children were  
12 interviewed, the study team met to review the responses to identify whether the translated  
13 version of SSPedi should be modified. Modification could be made to the script, the instrument  
14 itself or a synonym list of terms available for each SSPedi item. Formal evaluation of difficulty  
15 with understanding and incorrect understanding was performed after each group of 10 children  
16 were interviewed (considered one iteration).  
17  
18  
19  
20  
21  
22  
23

24 Criteria to consider Spanish SSPedi satisfactory were as follows: no more than one of the  
25 last 10 participants found the entire instrument and each item hard to understand, no more than  
26 one of the last 10 participants were incorrect in their understanding of each item as adjudicated  
27 by the raters, and other comments including those pertaining to cultural relevance did not  
28 suggest that modification was required. Sample size was based upon the suggestion that seven  
29 to 10 interviews are sufficient to determine understandability of an item.<sup>(14)</sup> We therefore  
30 intended to enroll up to 10-30 children to allow for up to three iterations consisting of 10 children  
31 each. All analyses were descriptive.  
32  
33  
34  
35  
36  
37  
38  
39  
40  
41  
42

### 43 **Finalization**

44  
45 The final version of Spanish SSPedi was reviewed by all members of the translation panel  
46 to ensure cohesiveness and freedom from minor error. The final version was then formatted.  
47  
48  
49  
50

### 51 **Patient and Public Involvement**

52  
53 No patients were involved in study design or conduct apart from being participants in the  
54 research.  
55  
56  
57  
58  
59  
60

## RESULTS

Between January 2018 and April 2019, we identified 38 children and enrolled 20 participants (Figure 1). Table 1 shows the demographics of the included participants. The number of children who were 8-10, 11-14 and 15-18 years of age were 4 (20%), 7 (35%) and 9 (45%) respectively. The most common types of Spanish spoken were Mexican (13, 65%) followed by Central American (2, 10%), South American (2, 10%) and other (3, 15%). After enrollment of 20 children, the North American Spanish SSPedi was considered satisfactory

**Table 1: Demographic Characteristics of Participants Evaluating North American Spanish SSPedi**

|                              | Cohort 1<br>(n=10) | Cohort 2<br>(n=10) |
|------------------------------|--------------------|--------------------|
| Sex                          |                    |                    |
| Male                         | 6 (60%)            | 6 (60%)            |
| Female                       | 4 (40%)            | 4 (40%)            |
| Age in Years                 |                    |                    |
| 8-10                         | 1 (10%)            | 3 (30%)            |
| 11-14                        | 4 (40%)            | 3 (30%)            |
| 15-18                        | 5 (50%)            | 4 (40%)            |
| Diagnosis                    |                    |                    |
| Leukemia/lymphoma            | 9 (90%)            | 4 (40%)            |
| Solid tumor                  | 1 (10%)            | 3 (30%)            |
| Brain tumor                  | 0                  | 2 (20%)            |
| Other*                       | 0                  | 1 (10%)            |
| Metastatic Disease           | 0                  | 0                  |
| Relapse                      | 1 (10%)            | 1 (10%)            |
| Stem Cell Transplantation    | 1 (10%)            | 1 (10%)            |
| Active Treatment             | 7 (70%)            | 4 (40%)            |
| Born in Country of Interview | 6 (60%)            | 9 (90%)            |
| Type of Spanish Spoken       |                    |                    |
| Mexican                      | 5 (50%)            | 8 (80%)            |
| Central American             | 2 (20%)            | 0                  |
| South American               | 1 (10%)            | 1 (10%)            |
| Other                        | 2 (20%)            | 1 (10%)            |
| Inpatient at Interview       | 0                  | 1 (10%)            |
| Attending School             | 5 (50%)            | 9 (90%)            |

Abbreviation: SSPedi – Symptom Screening in Pediatrics Tool

\*Other - primary immunodeficiency (n=1)

1  
2  
3 None of the child respondents reported that it was hard or very hard to complete Spanish  
4 SSPedi overall. Table 2 shows self-reported difficulty with understanding and adjudicated  
5 incorrect understanding of SSPedi items. It shows that after enrolling the first 10 participants,  
6 two participants found two items (mouth sores and tingly or numb hands or feet) hard to  
7 understand and therefore, criteria were not met to consider that version satisfactory. Changes  
8 made were additions to the synonym list only, based on alternative words given by children  
9 during the interview process. No changes to the instrument itself were required. In the last 10  
10 enrolled participants, at most one participant found each item hard to understand and none  
11 were incorrect in their understanding of each item. None of the respondents were incorrect in  
12 their understanding of the response scale. In terms of cultural relevance, no issues were  
13 identified by any of the 20 respondents. None of the children interviewed indicated that there  
14 were additional symptoms they felt were missing from the tool.  
15  
16  
17  
18  
19  
20  
21  
22  
23  
24  
25  
26  
27  
28  
29  
30  
31  
32  
33  
34  
35  
36  
37  
38  
39  
40  
41  
42  
43  
44  
45  
46  
47  
48  
49  
50  
51  
52  
53  
54  
55  
56  
57  
58  
59  
60

**Table 2: Self-reported Difficulty with Understanding and Rater-Adjudicated Incorrectness with North American Spanish SSPedi\***

|                                 | Cohort 1<br>(n=10) |           | Cohort 2<br>(n=10) |           |
|---------------------------------|--------------------|-----------|--------------------|-----------|
|                                 | Hard to Understand | Incorrect | Hard to Understand | Incorrect |
| Disappointed or Sad             | 0                  | 0         | 0                  | 0         |
| Scared or Worried               | 0                  | 0         | 0                  | 0         |
| Cranky or Angry                 | 1                  | 0         | 1                  | 0         |
| Difficulty Thinking/Remembering | 0                  | 0         | 1                  | 0         |
| Changes in your face/body       | 0                  | 0         | 1                  | 0         |
| Tired                           | 0                  | 0         | 0                  | 0         |
| Mouth sores                     | 2                  | 1         | 1                  | 0         |
| Headache                        | 0                  | 0         | 0                  | 0         |
| Hurt or Pain                    | 0                  | 1         | 0                  | 0         |
| Tingly or numb hands or feet    | 2                  | 0         | 1                  | 0         |
| Throwing Up                     | 0                  | 0         | 0                  | 0         |
| More or less hungry             | 0                  | 0         | 0                  | 0         |
| Changes in Taste                | 0                  | 0         | 1                  | 0         |
| Constipation                    | 0                  | 0         | 1                  | 0         |
| Diarrhea                        | 0                  | 0         | 0                  | 0         |

\* Hard = rated as hard or very hard to understand by participant  
Incorrect = rated as partially or completely incorrect by rater

Thus, after 20 participants, the North American Spanish version of SSPedi was considered satisfactory and appropriate for utilization. Figure 2 shows the final version.

## DISCUSSION

We translated a self-report symptom screening tool for pediatric patients with cancer and HSCT recipients named SSPedi into Spanish appropriate for use in North America. The final version was acceptable based upon self-reported difficulty with understanding, adjudicated incorrect understanding of different aspects of SSPedi and cultural relevance. Many patient-reported outcomes incorporated into oncology clinical trials are only validated in English,<sup>(15)</sup> leading to potential disparities in clinical trial participation. Consequently, translation into non-English languages should be a priority.

1  
2  
3 We found that at least two versions of Spanish SSPedi will be needed since Argentinian  
4 Spanish was considered sufficiently different from North American Spanish to require a distinct  
5 version. Interestingly, different quality of life instruments have taken alternate approaches to  
6 Spanish translation. For example, the developers of the PedsQL modules have chosen to  
7 translate Spanish for several different countries including the United States, Argentina,  
8 Columbia and Spain.(16) In contrast, the Patient-Reported Outcome Measurement Information  
9 System has a single Spanish translation version.(17) It is possible that the Argentinian version  
10 would be appropriate for other countries where voseo conjugation is prominent, such as several  
11 countries in Central America. However, we cannot be sure without explicit evaluation of the  
12 Argentinian version in those countries.

13  
14 We termed this version of Spanish SSPedi “North American” even though we did not  
15 include a site in Mexico. However, we noted that the majority of children self-identified their  
16 Spanish type as Mexican, thus providing reassurance that this version should be appropriate in  
17 that country. Ideally, further testing in Mexico would be conducted to confirm understandability  
18 and cultural relevance in that setting. Some could argue that North American Spanish is not a  
19 distinct form of Spanish as it reflects the Spanish spoken in several different originating  
20 countries. To emphasize this point, four children identified their Spanish type as Central or  
21 South American. However, regardless of Spanish type of origin, there is likely to be changes in  
22 how Spanish is understood and used upon moving to North America. In addition, a study  
23 conducted in the United States or Canada is unlikely to use multiple versions of Spanish. Thus,  
24 creating a North America Spanish version addresses a practical clinical and research need in  
25 these geographic locations.

26  
27 During the creation of English SSPedi, we found four items more difficult to understand by  
28 children 8-18 years of age, namely ‘changes in how your body and face look’, ‘tingly or numb  
29 hands or feet’, ‘feeling more or less hungry than you usually do’, and ‘constipation (hard to  
30 poop).(18) Interestingly, three of these four items were similarly hard to understand by at least  
31  
32  
33  
34  
35  
36  
37  
38  
39  
40  
41  
42  
43  
44  
45  
46  
47  
48  
49  
50  
51  
52  
53  
54  
55  
56  
57  
58  
59  
60

1  
2  
3 one participant in this current study focused on Spanish translation. This may suggest that  
4  
5 difficulty with understanding was not related to Spanish translation but rather, that these are  
6  
7 more difficult concepts for children in general to understand, particularly if respondents had no  
8  
9 previous experience with the symptom. This hypothesis is supported by the absence or limited  
10  
11 number of self-reported instruments for at least peripheral neuropathy among pediatric cancer  
12  
13 patients.(19)  
14

15  
16 The main implication of this work is that there is now a symptom assessment tool that can  
17  
18 be used among North American Spanish speaking children receiving cancer treatments. Given  
19  
20 known disparities based upon race, ethnicity and language,(20, 21) development of such a tool  
21  
22 may be an important step toward reducing disparities in terms of both clinical trial enrollment  
23  
24 and routine clinical care. Future efforts could evaluate barriers to utilization of the translated tool  
25  
26 as well as translating SSPedi to other Spanish-speaking populations.  
27

28  
29 The strengths of this study were conduct of the translation according to internationally  
30  
31 recognized standards(13) and evaluation in two countries. Other strengths include its multi-  
32  
33 center conduct to improve generalizability, multiple approaches to assessing understandability  
34  
35 to improve validity and use of external adjudicators to improve reliability. However, weaknesses  
36  
37 included enrollment of a limited number of children and in only two centers. Evaluation in other  
38  
39 locations and with additional children may influence the synonym list further although based  
40  
41 upon the initial results, it is less likely that changes to the instrument itself will be required. In  
42  
43 addition, throughout the SSPedi program, ease or difficulty in understanding has focused on the  
44  
45 number of children describing an item as hard or very hard to understand. Focusing on those  
46  
47 who find an item neither easy nor hard to understand could lead to different results.  
48

49  
50 In summary, we translated and finalized Spanish SSPedi appropriate for use in North  
51  
52 America based upon self-reported difficulty with understanding, adjudicated incorrect  
53  
54 understanding of different aspects of SSPedi and cultural relevance. This work is important as  
55  
56 translation of patient-reported outcomes to non-English languages may reduce disparities in  
57

1  
2  
3 clinical trial enrollment and cancer care delivery. Future research will translate and evaluate  
4  
5 SSPedi for use in Argentina and other Spanish-speaking countries.  
6  
7

## 8 9 **ACKNOWLEDGMENTS**

10  
11 We thank all the translators who worked with us on this project and whose expertise and  
12  
13 insights greatly assisted the translation and evaluation process.  
14  
15

## 16 17 **AUTHOR CONTRIBUTORSHIP**

18  
19 LD and LS developed the study concept and design. EP, DN, CS, SG, GG, and GD were  
20  
21 involved in data collection. LS drafted the manuscript. All authors EP, AG, AS, AML, DN, CS,  
22  
23 SG, GG, GD, LD, and LS participated in data interpretation, reviewed, revised, and approved  
24  
25 the manuscript.  
26  
27

## 28 29 **COMPETING INTERESTS**

30  
31 The authors declare that they have no competing interests.  
32  
33  
34  
35

## 36 37 **FUNDING**

38  
39 This research received no specific grant from any funding agency in the public, commercial or  
40  
41 not-for-profit sectors. LS is supported by a Canada Research Chair in Pediatric Oncology  
42  
43 Supportive Care.  
44  
45

## 46 47 **DATA SHARING**

48  
49 The datasets used or analyzed during the current study are available from the corresponding  
50  
51 author on reasonable request.  
52  
53

## 54 55 **FIGURE LEGEND**



Figure 1: North American Spanish SSPedi Participant Flow Diagram

Figure 2: North American Spanish SSPedi

## REFERENCES

1. Baggott C, Dodd M, Kennedy C, et al. Changes in children's reports of symptom occurrence and severity during a course of myelosuppressive chemotherapy. *J Pediatr Oncol Nurs*. 2010;27(6):307-15. doi:10.1177/1043454210377619
2. Miller E, Jacob E, Hockenberry MJ. Nausea, pain, fatigue, and multiple symptoms in hospitalized children with cancer. *Oncol Nurs Forum*. 2011;38(5):E382-93. doi:10.1188/11.ONF.E382-E393
3. Poder U, Ljungman G, von Essen L. Parents' perceptions of their children's cancer-related symptoms during treatment: a prospective, longitudinal study. *J Pain Symptom Manage*. 2010;40(5):661-70. doi:10.1016/j.jpainsymman.2010.02.012
4. Loves R, Plenert E, Tomlinson V, et al. Changes in hunger among pediatric patients with cancer and hematopoietic stem cell transplantation recipients. *Support Care Cancer*. 2020. doi:10.1007/s00520-020-05425-w
5. Loves R, Plenert E, Tomlinson V, et al. Changes in taste among pediatric patients with cancer and hematopoietic stem cell transplantation recipients. *Qual Life Res*. 2019;28(11):2941-9. doi:10.1007/s11136-019-02242-5
6. Loves R, Tomlinson D, Baggott C, et al. Taste changes in children with cancer and hematopoietic stem cell transplant recipients. *Support Care Cancer*. 2019;27(6):2247-54. doi:10.1007/s00520-018-4509-2
7. Johnston DL, Hyslop S, Tomlinson D, et al. Describing symptoms using the Symptom Screening in Pediatrics Tool in hospitalized children with cancer and hematopoietic stem cell transplant recipients. *Cancer Med*. 2018;7(5):1750-5. doi:10.1002/cam4.1433
8. Dupuis LL, Johnston DL, Baggott C, et al. Validation of the Symptom Screening in Pediatrics Tool in Children Receiving Cancer Treatments. *J Natl Cancer Inst*. 2018;110(6):661-8. doi:10.1093/jnci/djx250
9. Dupuis LL, Ethier MC, Tomlinson D, et al. A systematic review of symptom assessment scales in children with cancer. *BMC Cancer*. 2012;12:430. doi:10.1186/1471-2407-12-430
10. Tomlinson D, Dupuis LL, Gibson P, et al. Initial development of the Symptom Screening in Pediatrics Tool (SSPedi). *Support Care Cancer*. 2014;22(1):71-5. doi:10.1007/s00520-013-1945-x
11. Gonzalez-Barrera A, Lopez M. Spanish is the most spoken non-English language in U.S. homes, even among non-Hispanics Washington, D.C.: Pew Research Center; 2013 [updated 20Jan2020]. [Available from: <https://www.pewresearch.org/fact-tank/2013/08/13/spanish-is-the-most-spoken-non-english-language-in-u-s-homes-even-among-non-hispanics/>.]
12. Yang L. Treatment of cultural differences in translation. *Studies in Literature and Language*. 2014;8(1):39-42. doi:10.3968/j.sll.1923156320140801.2941
13. Wild D, Grove A, Martin M, et al. Principles of Good Practice for the Translation and Cultural Adaptation Process for Patient-Reported Outcomes (PRO) Measures: report of the ISPOR Task Force for Translation and Cultural Adaptation. *Value Health*. 2005;8(2):94-104. doi:10.1111/j.1524-4733.2005.04054.x
14. Willis G, editor. Cognitive Interviewing: A Tool for Improving Questionnaire Design: Sage Publications; 2009.

- 1  
2  
3 15. Grant SR, Noticewala SS, Mainwaring W, et al. Non-English language validation of  
4 patient-reported outcome measures in cancer clinical trials. *Support Care Cancer*.  
5 2020;28(6):2503-5. doi:10.1007/s00520-020-05399-9  
6 16. Varni JW. PedsQL Translations 2019 [updated 20Jan2020]. [Available from:  
7 <https://www.pedsq.org/translations.html>.]  
8 17. HealthMeasures. Available Translations 2019 [updated 20Jan2020]. [Available from:  
9 [http://www.healthmeasures.net/explore-measurement-systems/promis/intro-to-promis/available-](http://www.healthmeasures.net/explore-measurement-systems/promis/intro-to-promis/available-translations/117-available-translations)  
10 [translations/117-available-translations](http://www.healthmeasures.net/explore-measurement-systems/promis/intro-to-promis/available-translations/117-available-translations).]  
11 18. O'Sullivan C, Lee Dupuis L, Gibson P, et al. Evaluation of the electronic self-report  
12 Symptom Screening in Pediatrics Tool (SSPedi). *BMJ Support Palliat Care*. 2018;8(1):110-6.  
13 doi:10.1136/bmjspcare-2015-001084  
14 19. Johnston DL, Sung L, Stark D, et al. A systematic review of patient-reported outcome  
15 measures of neuropathy in children, adolescents and young adults. *Support Care Cancer*.  
16 2016;24(9):3723-8. doi:10.1007/s00520-016-3199-x  
17 20. Bhatia S. Disparities in cancer outcomes: lessons learned from children with cancer.  
18 *Pediatr Blood Cancer*. 2011;56(6):994-1002. doi:10.1002/pbc.23078  
19 21. Vega WA, Rodriguez MA, Gruskin E. Health disparities in the Latino population.  
20 *Epidemiol Rev*. 2009;31:99-112. doi:10.1093/epirev/mxp008  
21  
22  
23  
24  
25  
26  
27  
28  
29  
30  
31  
32  
33  
34  
35  
36  
37  
38  
39  
40  
41  
42  
43  
44  
45  
46  
47  
48  
49  
50  
51  
52  
53  
54  
55  
56  
57  
58  
59  
60

**Figure 1: North American Spanish SSPedi Participant Flow Diagram**



1  
2  
3  
4  
5  
6  
7  
8  
9  
10  
11  
12  
13  
14  
15  
16  
17  
18  
19  
20  
21  
22  
23  
24  
25  
26  
27  
28  
29  
30  
31  
32  
33  
34  
35  
36  
37  
38  
39  
40  
41  
42  
43  
44  
45  
46  
47  
48  
49  
50  
51  
52  
53  
54  
55  
56  
57  
58  
59  
60

Figure 2: North American Spanish SSPedi

## Spanish SSPedi (North America): detección de síntomas en pediatría

Marca el círculo que mejor describe cuánto te **molestó** cada una de estas cosas **ayer u hoy**:

|                                                            | No me molestó para nada | Un poco               | Más o menos           | Mucho                 | Me molestó muchísimo  |
|------------------------------------------------------------|-------------------------|-----------------------|-----------------------|-----------------------|-----------------------|
| Te sientes decepcionado o triste                           | <input type="radio"/>   | <input type="radio"/> | <input type="radio"/> | <input type="radio"/> | <input type="radio"/> |
| Te sientes asustado o preocupado                           | <input type="radio"/>   | <input type="radio"/> | <input type="radio"/> | <input type="radio"/> | <input type="radio"/> |
| Estas de mal humor o enojado                               | <input type="radio"/>   | <input type="radio"/> | <input type="radio"/> | <input type="radio"/> | <input type="radio"/> |
| Te cuesta pensar o recordar cosas                          | <input type="radio"/>   | <input type="radio"/> | <input type="radio"/> | <input type="radio"/> | <input type="radio"/> |
| Notas algún cambio en el cuerpo o la cara                  | <input type="radio"/>   | <input type="radio"/> | <input type="radio"/> | <input type="radio"/> | <input type="radio"/> |
| Te sientes cansado                                         | <input type="radio"/>   | <input type="radio"/> | <input type="radio"/> | <input type="radio"/> | <input type="radio"/> |
| Tienes llagas en la boca                                   | <input type="radio"/>   | <input type="radio"/> | <input type="radio"/> | <input type="radio"/> | <input type="radio"/> |
| Tienes dolor de cabeza                                     | <input type="radio"/>   | <input type="radio"/> | <input type="radio"/> | <input type="radio"/> | <input type="radio"/> |
| Sientes malestar o dolor (que no sea dolor de cabeza)      | <input type="radio"/>   | <input type="radio"/> | <input type="radio"/> | <input type="radio"/> | <input type="radio"/> |
| Sientes hormigueo o entumecimiento en las manos o los pies | <input type="radio"/>   | <input type="radio"/> | <input type="radio"/> | <input type="radio"/> | <input type="radio"/> |
| Tienes vómitos o ganas de vomitar                          | <input type="radio"/>   | <input type="radio"/> | <input type="radio"/> | <input type="radio"/> | <input type="radio"/> |
| Tienes más o menos hambre que de costumbre                 | <input type="radio"/>   | <input type="radio"/> | <input type="radio"/> | <input type="radio"/> | <input type="radio"/> |
| Notas cambios en el gusto                                  | <input type="radio"/>   | <input type="radio"/> | <input type="radio"/> | <input type="radio"/> | <input type="radio"/> |
| Tienes estreñimiento (dificultad para hacer popó)          | <input type="radio"/>   | <input type="radio"/> | <input type="radio"/> | <input type="radio"/> | <input type="radio"/> |
| Tienes diarrea (popó aguada)                               | <input type="radio"/>   | <input type="radio"/> | <input type="radio"/> | <input type="radio"/> | <input type="radio"/> |

Cuéntanos cualquier otra cosa que te haya molestado recientemente y escríbelo aquí.

Fecha de la versión: 27 febrero 2018

## Appendix 1: Guidelines for Conducting Translation of SSPedi

| Step | Description                            | Details                                                                                                                                                                                                                                                                                                                                                                                                                                                                                                                                  |
|------|----------------------------------------|------------------------------------------------------------------------------------------------------------------------------------------------------------------------------------------------------------------------------------------------------------------------------------------------------------------------------------------------------------------------------------------------------------------------------------------------------------------------------------------------------------------------------------------|
| 1    | Forward translation                    | Two native speakers of the target language independently produce a forward translation of SSPedi from English into the target language. Both must be professional medical translators and at least one must reside in the country targeted for translation.                                                                                                                                                                                                                                                                              |
| 2    | Reconciliation of forward translations | Translation panel consists of the two forward translators and investigators from enrollment sites where translation will be tested. Discrepancies between translators identified and resolved by consensus. Goal is to produce a single translated version of the tool.                                                                                                                                                                                                                                                                  |
| 3    | Back translation                       | Forward translation is back translated into English by an independent translator. Back translator must be a native English speaker with no knowledge of English SSPedi.                                                                                                                                                                                                                                                                                                                                                                  |
| 4    | Back translation review                | Comparison of back translated version of SSPedi with original SSPedi tool by the research team to detect mistranslations or inaccuracies. Goal is to produce a final translated version of the tool ready for testing.                                                                                                                                                                                                                                                                                                                   |
| 5    | Cognitive interviewing                 | Goals are to determine if<br>a) SSPedi items and response scale are:<br><ul style="list-style-type: none"> <li>• Easy to understand as rated by children</li> <li>• Correctly interpreted as rated by the interviewer and a second adjudicator</li> </ul> b) there are any issues with cultural relevancy<br>A minimum of <b>10</b> children from target population must be enrolled.                                                                                                                                                    |
| 6    | Review interview findings              | Interview findings are summarized by iterations of 10 children. Translation panel decides whether revisions required or whether translated version is satisfactory. In general, criteria to consider the translation satisfactory are:<br>a) No more than one participants in the last 10 finds an item hard or very hard to understand<br>b) No more than one participant in the last 10 is incorrect in their understanding of an item<br>c) Comments do not indicate other modification or additions to the synonym list are required |
| 7    | <i>Further cognitive interviewing</i>  | <i>If any changes were made, additional cognitive interviews conducted in iterations of 10 children until the translated version is considered satisfactory</i>                                                                                                                                                                                                                                                                                                                                                                          |
| 8    | Finalization                           | The final translated version of SSPedi reviewed by the translation panel to ensure cohesiveness and freedom from minor error.                                                                                                                                                                                                                                                                                                                                                                                                            |
