# Supplementary material for: Translating the Symptom Screening in Paediatrics Tool (SSPedi) into North American Spanish and Among Spanish-speaking children receiving cancer treatments: evaluating understandability and cultural relevance in a multiple-phase descriptive study
Source: PubMed Central journal article supplement — BMJ Open. 2020 Nov 12;10(11):e037406. doi: 10.1136/bmjopen-2020-037406 (PMC7662419; doi:10.1136/bmjopen-2020-037406), 2020-11-12
Supplement: bmjopen-2020-037406supp001.pdf [file bmjopen-2020-037406supp001.pdf]

### Appendix 1: Guidelines for Conducting Translation of SSPedi

| Step | Description                            | Details                                                                                                                                                                                                                                                                                                                                                                                                                                                                                                                                  |
|------|----------------------------------------|------------------------------------------------------------------------------------------------------------------------------------------------------------------------------------------------------------------------------------------------------------------------------------------------------------------------------------------------------------------------------------------------------------------------------------------------------------------------------------------------------------------------------------------|
| 1    | Forward translation                    | Two native speakers of the target language independently produce a forward translation of SSPedi from English into the target language. Both must be professional medical translators and at least one must reside in the country targeted for translation.                                                                                                                                                                                                                                                                              |
| 2    | Reconciliation of forward translations | Translation panel consists of the two forward translators and investigators from enrollment sites where translation will be tested. Discrepancies between translators identified and resolved by consensus. Goal is to produce a single translated version of the tool.                                                                                                                                                                                                                                                                  |
| 3    | Back translation                       | Forward translation is back translated into English by an independent translator. Back translator must be a native English speaker with no knowledge of English SSPedi.                                                                                                                                                                                                                                                                                                                                                                  |
| 4    | Back translation review                | Comparison of back translated version of SSPedi with original SSPedi tool by the research team to detect mistranslations or inaccuracies. Goal is to produce a final translated version of the tool ready for testing.                                                                                                                                                                                                                                                                                                                   |
| 5    | Cognitive interviewing                 | Goals are to determine if<br>a) SSPedi items and response scale are:<br><ul style="list-style-type: none"> <li>• Easy to understand as rated by children</li> <li>• Correctly interpreted as rated by the interviewer and a second adjudicator</li> </ul> b) there are any issues with cultural relevancy<br>A minimum of <b>10</b> children from target population must be enrolled.                                                                                                                                                    |
| 6    | Review interview findings              | Interview findings are summarized by iterations of 10 children. Translation panel decides whether revisions required or whether translated version is satisfactory. In general, criteria to consider the translation satisfactory are:<br>a) No more than one participants in the last 10 finds an item hard or very hard to understand<br>b) No more than one participant in the last 10 is incorrect in their understanding of an item<br>c) Comments do not indicate other modification or additions to the synonym list are required |
| 7    | <i>Further cognitive interviewing</i>  | <i>If any changes were made, additional cognitive interviews conducted in iterations of 10 children until the translated version is considered satisfactory</i>                                                                                                                                                                                                                                                                                                                                                                          |
| 8    | Finalization                           | The final translated version of SSPedi reviewed by the translation panel to ensure cohesiveness and freedom from minor error.                                                                                                                                                                                                                                                                                                                                                                                                            |
